# Supplementary material for: The Fly Homologue of MFSD11 Is Possibly Linked to Nutrient Homeostasis and Has a Potential Role in Locomotion: A First Characterization of the Atypical Solute Carrier CG18549 in Drosophila Melanogaster
Source: Insects. 2021 Nov 13;12(11):1024. doi: 10.3390/insects12111024 (PMC8621210; doi:10.3390/insects12111024)
Supplement: Supplementary file 1 [file insects-12-01024-s001.zip › RNA sec data 2020-12-25_supplementary data.xlsx]

## Sheet: Information
Information
Driver ctrl = Da-Gal4>w1118
RNAi ctrl = CG18549RNAi (Stock no. 34391)>w1118
CG18549 RNAi KD (KnockDown) = CG18549RNAi (Stock no. 34391)>w1118
SRA submission details
Submission ID:
BioProject ID:
Number of samples
SL-2415-2	CG18549 KD 2
SL-2415-3	CG18549 KD 3
SL-2415-4	CG18549 KD 4
SL-2415-5	DRIVER CTRL 1
SL-2415-6	DRIVER CTRL 2
SL-2415-7	DRIVER CTRL 3
SL-2415-8	DRIVER CTRL 4
SL-2415-9	RNAI CTRL 1
SL-2415-10	RNAI CTRL 2
SL-2415-12	RNAI CTRL 4
For RNA-sequencing approximately 1g of total RNA (diluted in water) per sample was collected from whole flies. RNA was obtained using the Trizol protocol and RNA quality was tested using with a RIN value obtained from a Bioanalyzer/TapeStation or equivalent. RNA with RIN value of 8 or higher was used for RNA sequencing. TruSeq stranded mRNA protocol with a poly-A selection was used before the lib…
Transcripts were aligned against D. melanogaster genome assembly 6.09.
Deseq2 was used to calculate relative expression.
ANOVA with FDR correction
baseMean: The average of the normalized count values, dividing by size factors, taken over all samples.
log2FoldChange: The effect size estimate. This value indicates how much the gene or transcript's expression seems to have changed compared with the control group.
lfcSE = standard error of the log2FoldChange estimate
stat = Wald statistic
pvalue = Wald test p-value
padj = Benjamini-Hochberg adjusted p-value

## Sheet: Driver ctrl vs RNAi ctrl
Flybase Gene ID	baseMean	log2FoldChange	lfcSE	stat	pvalue	padj
FBgn0000003	78.5440088637727	-2.524614755651	0.950591648657336	-2.65583519402563	0.00791122669638122	0.862280468618376
FBgn0000008	477.693103492774	-0.00359891207537384	0.223137948256849	-0.0161286419611209	0.987131763503947	1
FBgn0000014	443.953265425064	-0.414233331781251	0.190318989742569	-2.17652128324954	0.0295163040029145	0.862280468618376
FBgn0000015	385.135541828673	-0.454767539221629	0.258308176615578	-1.76056191941004	0.0783125787110157	0.862280468618376
FBgn0000017	1552.1051924553	-0.182492019049558	0.37582499364071	-0.485577122696692	0.627267019870712	0.907500711149188
FBgn0000018	271.650303050588	0.038733196088096	0.176002100039886	0.22007235186011	0.825814806979505	0.962268594860431
FBgn0000022	0.0925714499852765	0	3.81693625648277	0	1	1
FBgn0000024	1751.62902151555	-0.453667278841205	0.34091514782664	-1.33073370817744	0.183276647480896	0.862280468618376
FBgn0000028	329.533140834814	0.211189301692821	0.218337261949319	0.967261839812955	0.333413155026933	0.862280468618376
FBgn0000032	656.987733059461	-0.23441059912819	0.285862736381028	-0.820011037800125	0.412209814851396	0.863505398638206
FBgn0000036	551.905864781056	-0.421309078230227	0.389317117321038	-1.08217455510133	0.279174972534742	0.862280468618376
FBgn0000037	464.757646261603	-0.200363473671038	0.275181901805832	-0.72811283138967	0.46654451976878	0.872908603164001
FBgn0000038	2045.87344745171	0.00320692353088097	0.162559254885014	0.0197277204127773	0.984260577388592	1
FBgn0000039	218.893281448045	0.354023651632969	0.287656720612811	1.23071573255362	0.218429201847957	0.862280468618376
FBgn0000042	22124.6373580345	-0.176364207470495	0.168846104873746	-1.04452636086791	0.296241929575047	0.862280468618376
FBgn0000043	4658.81851072365	0.157183206775389	0.105389681154804	1.4914477874215	0.135843969691433	0.862280468618376
FBgn0000044	20571.3360494901	-0.117097454128179	0.120131307883873	-0.974745519639003	0.329686507409911	0.862280468618376
FBgn0000045	19586.4733492135	-0.334136081566036	0.225418531732966	-1.48229197926752	0.138262621546514	0.862280468618376
FBgn0000046	11401.3241190141	-0.105324162271498	0.0956837073012717	-1.10075335960669	0.271004015831794	0.862280468618376
FBgn0000047	1347.34274128362	-1.39488735816723	0.680816423651215	-2.04884504795942	0.0404772691974667	0.862280468618376
FBgn0000052	1809.44911291357	-0.100861202155051	0.335220584296709	-0.300880097702404	0.763505927244412	0.947820762446549
FBgn0000053	1303.81974309547	0.0871697644105728	0.444725517623969	0.196008011584975	0.84460389529369	0.96678208028489
FBgn0000054	648.332624487099	-0.10588872534293	0.124182902041579	-0.852683611045558	0.393834781803498	0.862280468618376
FBgn0000055	408.336345883852	-0.319351249323465	0.26077510829184	-1.22462320662167	0.220717220055568	0.862280468618376
FBgn0000056	0	NA	NA	NA	NA	NA
FBgn0000057	1166.23096209425	0.0190785581443694	0.155897519495876	0.122378843525308	0.90259899298073	0.979489247123994
FBgn0000061	17.3035010742168	-0.330178820799508	0.501990487906156	-0.657739197761917	0.510705730260369	0.880871907382998
FBgn0000063	207.917268346762	0.0989500409030697	0.199446123780697	0.496124161389425	0.619806813476772	0.90507352214699
FBgn0000064	35690.5454381055	-0.261599033163886	0.175648101334042	-1.48933595738895	0.136398923605295	0.862280468618376
FBgn0000071	15.4295785686771	-0.390876310565557	0.540292800969932	-0.723452746110733	0.469401775526994	0.873720776466731
FBgn0000075	80.2661516402602	0.395058688959698	0.306775998212223	1.2877757427633	0.197824038567259	0.862280468618376
FBgn0000077	175.826887062962	-0.0897419314775966	0.246382987725355	-0.364237532412881	0.71568064229844	0.936777213174396
FBgn0000078	9666.70162996427	0.456408373836169	0.424513298471727	1.07513327728311	0.282315062690751	0.862280468618376
FBgn0000079	23175.1011124737	0.220425285800622	0.263671354881234	0.83598495521028	0.403163366859784	0.862985245685179
FBgn0000083	4759.35647093081	-0.141196097667134	0.145427831969395	-0.970901482577617	0.331597339821325	0.862280468618376
FBgn0000084	1613.04019371466	0.0416161212137375	0.14861979204787	0.28001735596786	0.779464189203807	0.948108195342305
FBgn0000092	59.506385799586	-0.0350028407640255	0.543974257470466	-0.0643465022164692	0.948694326733954	0.995527833059428
FBgn0000094	9443.63997886063	0.539039088323261	0.458732385235224	1.17506220548797	0.239969829861937	0.862280468618376
FBgn0000097	860.078828230872	-0.594500708864073	0.375854160582601	-1.58173241435602	0.113710669639489	0.862280468618376
FBgn0000099	831.4094173387	-0.476795851143551	0.246840106481237	-1.9315979803298	0.0534091453349271	0.862280468618376
FBgn0000100	22373.0223542138	0.146099075407251	0.220198038990023	0.663489448304627	0.507017135154305	0.880871907382998
FBgn0000108	3493.29315073493	-0.387242465702503	0.342675532535905	-1.13005577852842	0.25845272176067	0.862280468618376
FBgn0000109	316.042163299429	0.069152608165732	0.239922183056873	0.288229322043721	0.773171204986559	0.947820762446549
FBgn0000114	9116.66319581728	-0.0478858192351527	0.219927780755145	-0.217734290187132	0.827636144877362	0.96292168829682
FBgn0000115	700.988310018153	0.0432150753286391	0.158879931545576	0.271998325453977	0.785623306917882	0.949326006325744
FBgn0000116	34420.2330094948	-0.0812963645322727	0.14420063794497	-0.563772571958363	0.572908920486454	0.89137639634554
FBgn0000117	3585.02488756114	-0.146394293600656	0.205345945846996	-0.712915431550495	0.475898089529647	0.874543640863165
FBgn0000119	840.481356297124	-0.359046901491821	0.4129503003784	-0.869467587655981	0.384591429005463	0.862280468618376
FBgn0000120	28369.2919559965	0.301320547275971	0.19656341510762	1.53294318330293	0.125289854638595	0.862280468618376
FBgn0000121	37761.6834391142	0.271440427024371	0.214624293923268	1.26472368091478	0.205970397923133	0.862280468618376
FBgn0000137	1.10043962318205	0.133548531935165	1.58580478868331	0.0842149884324982	0.932885501476078	0.989409210982161
FBgn0000139	654.872221109424	0.0745286039218114	0.133871429674552	0.556717770946305	0.577720273219691	0.893427115943538
FBgn0000140	733.733236849472	-0.275164121873815	0.412993426231384	-0.666267558747174	0.505240097470462	0.880871907382998
FBgn0000146	198.284261618378	-0.35820463056643	0.40709756217424	-0.879898736443715	0.378914169295731	0.862280468618376
FBgn0000147	699.214532876297	0.148122648132778	0.178692961349429	0.828922678398778	0.4071481616877	0.863505398638206
FBgn0000150	10422.0616148544	0.304900201950082	0.304644597037258	1.00083902657493	0.316904638465503	0.862280468618376
FBgn0000152	336.896590076425	0.0852963850834876	0.116002886854321	0.735295365455899	0.46215963012108	0.871781705246879
FBgn0000153	1013.39727401114	0.116972833883696	0.201808615853754	0.579622596333865	0.562169151541932	0.889825455846315
FBgn0000157	246.300793676573	-0.337171072129664	0.238884132636888	-1.41144189196599	0.158114358012131	0.862280468618376
FBgn0000158	55.3773012520994	-0.187408065647336	0.621414535942698	-0.301583009098804	0.762969962034702	0.947820762446549
FBgn0000163	1425.22010072026	-0.321896876765915	0.355370953957931	-0.905805252738865	0.36503894028478	0.862280468618376
FBgn0000166	51.8768040988636	-3.19888867293152	1.86444878080296	-1.71572890919206	0.0862116710120085	0.862280468618376
FBgn0000173	1939.53469293206	-0.302007121901621	0.244450925734206	-1.23545092330719	0.216662730622788	0.862280468618376
FBgn0000179	184.283266572207	-0.303379161305126	0.37212048481171	-0.81527132659368	0.414917017835253	0.863658987555832
FBgn0000180	96.4916980366964	-0.0928152992271813	0.338640235947909	-0.274082313247203	0.784021365566441	0.948857848022038
FBgn0000181	11853.5730047907	-0.0418843764740626	0.159381925294441	-0.262792511739871	0.792710507510176	0.95004556916597
FBgn0000182	120.100240590119	-0.384533731070704	0.603148808495501	-0.637543713349758	0.523770745811575	0.881876796477609
FBgn0000183	1591.29057468156	-0.426301520162194	0.363269725684763	-1.1735123794272	0.240590395478802	0.862280468618376
FBgn0000206	707.849297699716	0.156658816089188	0.209167799325684	0.748962395713993	0.453879870843722	0.871330352614604
FBgn0000210	307.515473291586	-0.136545052823404	0.328262538638237	-0.415962946578817	0.677437117184287	0.924926268867383
FBgn0000212	1320.00853317494	-0.236556862737286	0.361891195953772	-0.653668465500619	0.513325423944294	0.880871907382998
FBgn0000216	1.40244667144912	-2.9664744410022	3.67776648093726	-0.806596736464411	0.419898854590919	0.864415509334833
FBgn0000221	157.423846309431	0.18867898605919	0.233725096951313	0.807268832146397	0.419511616743953	0.864415509334833
FBgn0000227	0	NA	NA	NA	NA	NA
FBgn0000228	1007.77778542462	-0.291334347506973	0.342258058735507	-0.851212528299042	0.394651304604098	0.862280468618376
FBgn0000229	1345.49455898436	-0.0877135388179724	0.168038845948619	-0.521983701582863	0.601681678554949	0.901194794138944
FBgn0000233	25.3320484772135	-0.0189383882976432	0.32765058987674	-0.0578005621926937	0.953907490364458	0.99673369313533
FBgn0000239	2084.8761118621	-0.237809793415672	0.320807557077517	-0.74128488612321	0.458520723712883	0.871330352614604
FBgn0000241	153.166411726633	0.227141522069761	0.217619116910845	1.04375720889823	0.29659773399081	0.862280468618376
FBgn0000244	2064.69025657775	-0.270662802060244	0.23337111509153	-1.15979564117902	0.2461320191826	0.862280468618376
FBgn0000246	137.431266304568	-0.273105064035034	0.47135086563498	-0.579409276499621	0.562313046258112	0.889825455846315
FBgn0000247	1381.72695739282	-0.192531589370968	0.332924966725821	-0.578303247318567	0.563059402403925	0.889825455846315
FBgn0000250	2689.57126776352	-0.178719003275081	0.156210306458111	-1.1440922646356	0.252585375322385	0.862280468618376
FBgn0000251	1258.98247883285	-0.00235545530656508	0.23851592405753	-0.00987546351830559	0.992120648200188	1
FBgn0000253	19564.5591896243	-0.347388752109977	0.320612300900218	-1.08351660598978	0.278579184104446	0.862280468618376
FBgn0000256	6880.61073390781	0.060582580056346	0.194812922927147	0.310978240796693	0.755817163395244	0.947820762446549
FBgn0000257	435.192360048555	-0.219761152395151	0.199744155494147	-1.10021317946192	0.271239249563301	0.862280468618376
FBgn0000259	2252.38876811773	-0.323316095851593	0.219542528484947	-1.47268093377071	0.140837090021763	0.862280468618376
FBgn0000261	17232.619081856	-0.035634081646403	0.126986895674996	-0.280612274652363	0.779007800362904	0.947882805300357
FBgn0000273	3546.86408147485	-0.549539323068044	0.429988453992431	-1.27803274242735	0.201237881672037	0.862280468618376
FBgn0000274	1875.14359046269	0.415312335881987	0.317011980572825	1.31008403887934	0.190167407346925	0.862280468618376
FBgn0000276	1070.68794300901	0.372375795188346	0.41163449705125	0.904627279433248	0.365662878341839	0.862280468618376
FBgn0000277	106.10187661539	0.725101426720429	0.545540023750727	1.32914432516825	0.183800359006781	0.862280468618376
FBgn0000278	6.54666137020702	0.875972302905633	0.893997758569508	0.979837247363217	0.327166462852958	0.862280468618376
FBgn0000279	54.016172899482	1.26123364937335	0.80809670245239	1.56074594234304	0.118583706671268	0.862280468618376
FBgn0000280	0.0783871076844186	0.603499852806475	3.81693625648277	0.158111064019337	0.874369282450895	0.970151593571103
FBgn0000281	0.525892543760648	-1.56003190273027	2.81273523822827	-0.554631620327313	0.579146656259077	0.893966966489364
FBgn0000283	1295.32056442426	-0.386951650962123	0.33737000311901	-1.14696519365897	0.251396006464304	0.862280468618376
FBgn0000286	2010.21361217905	-0.289837855887867	0.256013113483556	-1.13212113217194	0.257583511635835	0.862280468618376
FBgn0000287	830.542692684859	-0.0158064128516134	0.219620063130444	-0.0719716251161679	0.942624489150938	0.993555784575335
FBgn0000289	1885.77498657452	-0.248573158727772	0.22161160587013	-1.121661285526	0.262006483231431	0.862280468618376
FBgn0000299	3361.52958431464	-0.467748297500676	0.439194931832618	-1.06501296713265	0.286870061792935	0.862280468618376
FBgn0000303	465.543163587415	-0.316844179286881	0.290138701401716	-1.09204383198844	0.274813835666833	0.862280468618376
FBgn0000307	864.822148997251	-0.48720631096546	0.499554003041181	-0.975282568049599	0.329420114934065	0.862280468618376
FBgn0000308	6670.16865609458	-0.234167779557209	0.198080309164724	-1.18218605647709	0.237131884013586	0.862280468618376
FBgn0000316	428.044690850574	-0.220481533101756	0.327903359701931	-0.672397908036614	0.501330414231506	0.880871907382998
FBgn0000317	833.464407181312	-0.515386815205071	0.381346727480481	-1.35149138058737	0.176538079148649	0.862280468618376
FBgn0000318	2980.11320237584	0.104751580421096	0.12930480312462	0.810113606685896	0.417874884691443	0.864415509334833
FBgn0000319	5901.99532994765	-0.292133339882983	0.286626192912401	-1.01921369053758	0.308101528489283	0.862280468618376
FBgn0000320	496.404403630724	0.0910771880484663	0.203713466232691	0.447084769273101	0.654813855539996	0.917514857397842
FBgn0000326	404.712035838093	-0.0734313654823956	0.170072091326318	-0.431766111122267	0.665911412290054	0.921284658521606
FBgn0000330	207.502068222147	-0.193241426308877	0.222518060630053	-0.868430300721302	0.385158813031702	0.862280468618376
FBgn0000337	8.09229464154649	-0.892869090973618	0.568751094112366	-1.56987670039931	0.116443799096124	0.862280468618376
FBgn0000339	1006.99060161747	0.151322131304036	0.132056599529768	1.14588844361334	0.251841313496218	0.862280468618376
FBgn0000346	2363.52701313403	-0.00193336895464937	0.199189755591532	-0.00970616660936135	0.992255721115661	1
FBgn0000351	51.2151216649629	-0.449488310621395	0.682696210998215	-0.658401648317586	NA	NA
FBgn0000352	390.150943581456	-0.306858269625224	0.451370709205079	-0.679836470039539	0.496608011515366	0.879885315017845
FBgn0000355	210.311424236677	0.640198784260969	0.392435256212666	1.63134879989996	0.102816741802082	0.862280468618376
FBgn0000356	1.68682656657019	0.638445405953911	1.94431372893881	0.328365426037684	0.742635381034572	0.944874345859293
FBgn0000357	27.3183600028083	0.377645970768429	0.63269420227333	0.596885461272621	0.550583854647	0.886594960767225
FBgn0000358	1.58472493174498	-0.37459859519533	2.59645785397955	-0.144272934999191	0.885284949433945	0.973282688840611
FBgn0000359	0.359047485198135	0.603486131328208	3.81693625647447	0.158107469126461	0.874372115131773	0.970151593571103
FBgn0000360	1.56454444013411	0.0868210924226276	1.59403934767274	0.054466091159785	0.956563823805564	0.997232234149335
FBgn0000370	13718.3512803672	-0.2980583903631	0.231523164838655	-1.28738042506811	0.197961723740256	0.862280468618376
FBgn0000376	364.462530709217	-0.273702205434033	0.363116852040319	-0.753757926397871	0.450994591963372	0.871108747421259
FBgn0000377	444.381960447242	0.0105397549028526	0.153813996932182	0.0685227294854033	0.945369527084447	0.994587218958431
FBgn0000382	3674.60867394861	-0.361346691511301	0.327353694950534	-1.10384179890166	0.269661769420065	0.862280468618376
FBgn0000384	522.710748980156	-0.579908738891115	0.446623649530339	-1.29842819452337	0.194140235899218	0.862280468618376
FBgn0000392	0	NA	NA	NA	NA	NA
FBgn0000394	505.657375237763	-0.162319861748374	0.212066990219824	-0.765417859611802	0.444022761430638	0.868898993853825
FBgn0000395	475.17231861369	-0.256319376846761	0.27809596219591	-0.921693989451711	0.356688216621292	0.862280468618376
FBgn0000404	1273.33620776131	-0.694087449061061	0.557943676064836	-1.24400988636782	0.213495924356893	0.862280468618376
FBgn0000405	2688.92837518608	-0.502710472124437	0.535770082198327	-0.938295154633789	0.348092749130555	0.862280468618376
FBgn0000406	8478.93907094571	-0.19443149393271	0.235222403219738	-0.826585781249236	0.408471879216865	0.863505398638206
FBgn0000409	7167.5058515994	-0.211119841324406	0.256062554613176	-0.824485413899494	0.409663800269288	0.863505398638206
FBgn0000411	296.822263788533	-0.145722366542859	0.216445598824737	-0.673251696195749	0.500787177535416	0.880871907382998
FBgn0000412	2523.89548718891	-0.0782612485609188	0.140518005435508	-0.556948188371756	0.577562829238587	0.893288422450284
FBgn0000413	1533.35673411256	-0.230079346835805	0.296404513918939	-0.77623428804707	0.437610664313771	0.867489664718233
FBgn0000414	1713.52842747959	-0.261202915315461	0.452285876340267	-0.577517293772294	0.563590059572447	0.889825455846315
FBgn0000416	16634.7890263307	-0.269993541614959	0.241695642517192	-1.11708071690103	0.263959814569968	0.862280468618376
FBgn0000422	1438.50132846248	0.161319257770579	0.165979799390789	0.971921031129591	0.331089836151464	0.862280468618376
FBgn0000426	345.969051891718	0.46840497278061	0.287707673793893	1.62805867012141	0.103512445989313	0.862280468618376
FBgn0000427	52.8956413637024	0.380420033351744	0.418373947983079	0.90928231833195	0.363201121519288	0.862280468618376
FBgn0000439	96.2462555670372	-0.0864319017611912	0.30298960748002	-0.285263585375253	0.775442208937898	0.947820762446549
FBgn0000442	423.23890897737	0.108037460094506	0.26039481769116	0.414898656787569	0.678216093175842	0.925293480061426
FBgn0000447	3474.95685260795	0.355508350040697	0.241726775994987	1.47070322920316	0.141371392537728	0.862280468618376
FBgn0000448	230.019298158114	-0.21422527272931	0.216457469719959	-0.989687595472974	0.32232683993873	0.862280468618376
FBgn0000449	2.67128514307026	0.476979308555315	1.20816177570031	0.394797549590439	0.69299230348373	0.929200127588175
FBgn0000451	186.569780229819	0.015403355636481	0.185172884985332	0.0831836455845095	0.933705516599693	0.989526755697971
FBgn0000454	3060.10557378505	0.0595707115683354	0.135018003787773	0.441205690331277	0.659064094068918	0.91956758068858
FBgn0000455	1011.72694776429	0.176773366790563	0.15856314033507	1.1148452686861	0.26491673383787	0.862280468618376
FBgn0000459	187.030996101437	-0.2034510389698	0.241044228719512	-0.844040282775418	0.398646895875171	0.862280468618376
FBgn0000463	281.008983020135	-0.553456831440709	0.397301568163012	-1.39303963485396	0.163607805566325	0.862280468618376
FBgn0000464	1683.97808901679	-0.324990498356761	0.370650795269314	-0.876810470946442	0.38058959076522	0.862280468618376
FBgn0000473	1162.17248354864	0.00281541628176216	0.209634488676527	0.0134301197266564	0.989284636939643	1
FBgn0000477	927.541567166085	-0.133379184717219	0.15050179615887	-0.886229853206698	0.375493679863597	0.862280468618376
FBgn0000479	2906.64018312091	-0.630345050258945	0.329701152183078	-1.91186790244798	0.0558931395751168	0.862280468618376
FBgn0000482	383.328943191574	-0.0330924923571773	0.191325417123043	-0.172964433344971	0.862679384291311	0.970151593571103
FBgn0000489	3686.49160326754	-0.195466373557336	0.262378434812347	-0.744978807793917	0.456284531311118	0.871330352614604
FBgn0000490	425.715702384017	-0.444269749414021	0.184871689413889	-2.40312484200539	0.0162556368469839	0.862280468618376
FBgn0000492	314.788901836889	-0.0212616889559576	0.250678281393408	-0.0848166376351929	0.932407166283357	0.989094273738726
FBgn0000497	244.535303487238	-0.397699846230095	0.338229894330015	-1.17582701262371	0.239664009666062	0.862280468618376
FBgn0000499	1149.57594109072	-0.0546980850631678	0.149609170966195	-0.365606497983517	0.714658725643222	0.936266776013432
FBgn0000500	482.073388138912	0.599423512540276	0.379407320758765	1.5798944293998	0.114131045172907	0.862280468618376
FBgn0000504	1821.98720012907	-0.419278206817414	0.25599851655954	-1.63781498600949	0.101460294452053	0.862280468618376
FBgn0000520	217.959408496319	0.108387167037814	0.20457156026075	0.529825196130203	0.596233134122	0.89992502088346
FBgn0000524	262.538738454047	-0.442898380982023	0.486400376208838	-0.910563401356957	0.362525461551944	0.862280468618376
FBgn0000527	313.924308543209	-0.39716597248221	0.243561635939373	-1.6306589950031	0.102962293396265	0.862280468618376
FBgn0000529	16.5474796734636	-0.143750327425217	0.481304133157404	-0.298668383506703	0.765193082843009	0.947820762446549
FBgn0000533	186.347806890833	-0.233907419340669	0.194150212582811	-1.20477549949063	0.22828998070034	0.862280468618376
FBgn0000535	733.390579021524	-0.167972143662382	0.291747410618996	-0.575745105349858	0.564787482838247	0.890231605529048
FBgn0000536	3274.33030160681	-0.307152515465971	0.236119023380882	-1.30083764987671	0.193314031702675	0.862280468618376
FBgn0000541	2802.31311978762	-0.542374435012952	0.475706915705421	-1.14014410366238	0.254226270225927	0.862280468618376
FBgn0000542	243.205943165511	-0.18884388518987	0.481092004553081	-0.392531747363582	0.694665358688838	0.929851132035743
FBgn0000543	569.977347634963	-0.0860834999980539	0.113057526702021	-0.761413260215212	0.446410269706561	0.868898993853825
FBgn0000546	841.828893566344	-0.52979771660338	0.48313405026487	-1.0965853396442	0.272822699029076	0.862280468618376
FBgn0000547	1239.11961819754	-0.581735757117445	0.451801409834281	-1.28759172604358	0.197888121019463	0.862280468618376
FBgn0000551	25.1763223327659	0.783396520995725	0.669047849080874	1.17091254694555	0.241633931259537	0.862280468618376
FBgn0000552	0.814259333295386	-0.0807976200653455	2.72833348947994	-0.0296142756656727	0.976374679972701	0.999515521823451
FBgn0000556	116740.242045554	-0.162379083064606	0.138819265110995	-1.16971576628628	0.242115371206897	0.862280468618376
FBgn0000557	5116.0525452315	-0.289249136016406	0.169625514071064	-1.70522186830471	0.0881530529736424	0.862280468618376
FBgn0000559	63780.2901239645	-0.0545844129990463	0.110987759213171	-0.49180570349391	0.622856704172668	0.905788140417906
FBgn0000560	90.6043639434322	0.0540102835843205	0.367341879623706	0.147030019119103	0.883108325975186	0.972246830727722
FBgn0000562	1569.22777502247	-0.484543000650816	0.346816137223879	-1.39711780579008	0.162378148192073	0.862280468618376
FBgn0000564	2.95405503531649	-1.64798895387841	1.06099502276965	-1.55324852474469	0.120363772652107	0.862280468618376
FBgn0000565	1338.26606699882	0.0959093155969018	0.117097540053422	0.819054913990051	0.412755083659348	0.863505398638206
FBgn0000566	1484.12613548357	0.0850571180432157	0.195993257185711	0.433979817798634	0.66430309685206	0.920619671142457
FBgn0000567	699.756655004988	-0.160269584073086	0.381105713380586	-0.420538392488058	0.674092188822439	0.923413146361918
FBgn0000568	2998.46572309028	-0.229790042376132	0.35104172278208	-0.654594674829526	0.512728753561916	0.880871907382998
FBgn0000575	1518.29564095278	-0.491538651289948	0.334729979956743	-1.46846318143797	0.141978450307721	0.862280468618376
FBgn0000576	58.1696789328181	-0.191124456087725	0.333025169106052	-0.573903938254175	0.566032807911716	0.890231605529048
FBgn0000577	106.006655992074	0.128056638258721	0.360093708139144	0.355620315946311	0.722124927067912	0.938738929742342
FBgn0000578	810.318115037488	-0.356659596069756	0.382930544269444	-0.931395004674262	0.351649273902467	0.862280468618376
FBgn0000579	23384.7447370173	-0.161394617370106	0.120880212635622	-1.33516159387153	0.18182346384308	0.862280468618376
FBgn0000581	2206.20398402976	-0.298720845278734	0.42123750304405	-0.70915064095681	0.478230999975651	0.874917310219372
FBgn0000588	137.392325831047	-0.263926590452885	0.460278466626509	-0.573406338965335	0.566369599276707	0.890231605529048
FBgn0000591	0.674591929350861	-1.88527113901509	2.67968275701181	-0.70354266156394	0.481717630032647	0.87636988870685
FBgn0000592	16153.901094727	-0.187797270437092	0.190197445179541	-0.98738061523285	0.323456083752711	0.862280468618376
FBgn0000594	56.8582789832619	0.115460865886508	0.345422780636094	0.334259557733534	0.738183705262896	0.94383757117881
FBgn0000606	6.86428571778412	0.261426270013504	0.731607882447034	0.357331128170875	0.720843929257593	0.938288534615005
FBgn0000611	1975.07654602649	-0.521258952623287	0.394947341501823	-1.31981886658903	0.186895500968523	0.862280468618376
FBgn0000615	24765.3577930013	0.000477425881844725	0.201613524904395	0.00236802507208344	0.998110591121214	1
FBgn0000617	223.874544568095	0.0632303703546385	0.189837044496522	0.333077089997558	0.739076092495648	0.944259345717444
FBgn0000618	164.025365741432	0.272395374686706	0.311130461605499	0.87550210699746	0.381300764285604	0.862280468618376
FBgn0000625	135.188723716923	0.278117466247019	0.184185308156588	1.50998724616284	0.131046678553522	0.862280468618376
FBgn0000629	535.441359404384	-0.0859378217758066	0.140810037225332	-0.610310340578095	0.541656248316257	0.885297275953961
FBgn0000633	472.029791577497	-0.280161149840105	0.22783329541393	-1.22967606350558	0.21881843378891	0.862280468618376
FBgn0000635	1856.29633700613	-0.364602609901468	0.307177610923976	-1.18694395989591	0.235249725975092	0.862280468618376
FBgn0000636	1022.82585534315	-0.326309060954162	0.201079365594289	-1.62278740033697	0.104634860082491	0.862280468618376
FBgn0000639	23.9150858205392	-0.71927341900424	1.07671689357158	-0.668024643523831	0.504117861974324	0.880871907382998
FBgn0000640	16.7681232130876	0.0583068552012134	0.813190770239652	0.0717013243817684	0.942839602173219	0.993559833709372
FBgn0000644	14.3737644215409	-0.084772701930099	0.561151198376239	-0.151069270056625	0.879921073197147	0.970955889932188
FBgn0000658	28.9149401228932	-1.13356562179988	0.526864199563486	-2.15153282902701	0.0314341674962954	0.862280468618376
FBgn0000659	1082.54581616505	-0.33316640598689	0.41131427102715	-0.810004489158361	0.417937595658921	0.864415509334833
FBgn0000662	989.687593139759	-0.072803161396067	0.235408757694464	-0.309262756870575	0.757121658911051	0.947820762446549
FBgn0000667	6190.65850929929	-0.378946158567349	0.256433681545583	-1.47775501362908	0.139473363456412	0.862280468618376
FBgn0000709	578.874780272486	-0.189445933716062	0.368632949011049	-0.513914814788798	0.607311549247635	0.901676720310392
FBgn0000711	1761.36857578442	-0.4641504539134	0.335839835299409	-1.38205896122954	0.166953597955023	0.862280468618376
FBgn0000715	416.345768591566	0.437163841753837	0.319459645560393	1.36844777682943	0.171171958053592	0.862280468618376
FBgn0000719	695.292448699564	-0.373272103091464	0.229446218052059	-1.62683920554651	0.103771252545476	0.862280468618376
FBgn0000721	3772.42369140092	-0.412176796758681	0.346944958403676	-1.18801783042227	0.234826384999185	0.862280468618376
FBgn0000723	1960.31698444469	-0.266036894271896	0.299187368389607	-0.889198283015272	0.373896525432668	0.862280468618376
FBgn0000808	13.7296826714848	-0.599147905348259	0.756490620404123	-0.792009694750993	0.428355023396812	0.865018364870926
FBgn0000810	407.009705045551	-0.169980685911059	0.281331405581027	-0.604200890974123	0.545710088648972	0.885297275953961
FBgn0000826	38.7826664047902	-1.28664818255361	0.690245278791713	-1.86404488677693	0.0623154011082649	0.862280468618376
FBgn0000927	119.782318105344	-2.10160689206448	1.16018177767652	-1.81144621687933	0.0700718073084578	0.862280468618376
FBgn0000928	65.1352613303937	0.17336622757048	0.327718138202982	0.529010168680686	0.596798395861301	0.89992502088346
FBgn0000964	86.7292100701176	-0.480030243523481	0.526971585560563	-0.91092244188622	0.36233624018397	0.862280468618376
FBgn0000996	275.939635426126	-0.832404809735742	0.586616826354398	-1.41899238538523	0.155901236054098	0.862280468618376
FBgn0001075	207.085444111884	-0.0413405070872403	0.530367214467822	-0.0779469506400805	0.937870251782581	0.991039701728319
FBgn0001077	68.5728427066911	-0.269786699935119	0.493708943681831	-0.546448881244051	0.584757417281877	0.894854747929663
FBgn0001078	1029.60095178832	-0.510639485875142	0.407221958936948	-1.25395862052274	0.209857046160177	0.862280468618376
FBgn0001079	190.007240516049	-0.23376397010809	0.329999645176108	-0.708376428657491	0.478711526239002	0.875100962878463
FBgn0001083	149.151945837295	-0.314299158489278	0.363503656911976	-0.864638229940522	0.387237382562687	0.862280468618376
FBgn0001084	78.2427227483327	-0.230226007668644	0.314170152105342	-0.732806748590961	0.463676304654885	0.872726997395385
FBgn0001085	203.86734252777	-0.49153747998726	0.414881297066518	-1.18476654277441	0.236109764371936	0.862280468618376
FBgn0001086	526.209568957474	-0.0221759428480632	0.266343540315374	-0.0832606746227257	0.933644268786024	0.989526755697971
FBgn0001087	801.723917111839	-0.338851840646249	0.365756561751847	-0.926440906550702	0.354216893802374	0.862280468618376
FBgn0001089	1091.55485950677	-0.172622209484427	0.259378822328635	-0.665521602475754	0.505716931183102	0.880871907382998
FBgn0001090	2234.24549625446	-0.303972463770048	0.214320756515586	-1.41830622806682	0.156101379165577	0.862280468618376
FBgn0001091	15792.3296258835	-0.135522692565144	0.21163588814074	-0.640357803942119	0.521940008903629	0.881876796477609
FBgn0001092	11501.300797909	-0.15220964348592	0.178477556640759	-0.852822317554967	0.393757845712062	0.862280468618376
FBgn0001098	9017.74929878801	-0.0125659514005727	0.156039412772854	-0.0805306247778882	0.935815240273352	0.990529205656926
FBgn0001099	282.692708341972	0.434572591451411	0.396715945726147	1.09542506706145	0.273330457151576	0.862280468618376
FBgn0001104	706.733284905935	-0.527955210952121	0.280214602859644	-1.88411026964418	0.059550061393417	0.862280468618376
FBgn0001105	3289.95881635354	-0.500507737839965	0.338262190243105	-1.47964434771813	0.138968184789204	0.862280468618376
FBgn0001108	1479.5427679601	-0.163972198210136	0.245948133014907	-0.666694218004887	0.504967472815416	0.880871907382998
FBgn0001112	1944.07997430134	-0.493726922222574	0.326954761300955	-1.51007717476886	0.13102373295578	0.862280468618376
FBgn0001114	2328.87763831025	-0.418435698077802	0.311607774491929	-1.34282817160148	0.179327619045934	0.862280468618376
FBgn0001120	160.99256189452	-3.55083697885943	1.6053273988112	-2.21190828829618	0.0269730024576408	0.862280468618376
FBgn0001122	1804.76225186207	-0.521083752569391	0.357707764554252	-1.45673033745501	0.145190832019032	0.862280468618376
FBgn0001123	1425.08362719045	-0.266850032560834	0.181025054411449	-1.47410552328472	0.140453181640256	0.862280468618376
FBgn0001124	8603.37615192125	0.0966435077615784	0.151904951283858	0.636210386460579	0.52463930430494	0.881876796477609
FBgn0001125	8281.92028802493	0.105670043635126	0.181163902508212	0.583284209338206	0.559701990757127	0.889641630341084
FBgn0001128	16661.3305186605	-0.221630208855702	0.191608041302296	-1.15668532149985	0.247400948884001	0.862280468618376
FBgn0001133	379.096371004355	-0.0102984304058487	0.134807307853235	-0.0763937101767551	0.939105873536183	0.991767718976702
FBgn0001134	32.3950140846379	-1.05397802459953	0.41436946619754	-2.54357067925723	0.0109725855473913	0.862280468618376
FBgn0001137	491.393777640188	-0.202051148572291	0.209925503312187	-0.962489766056745	0.335803641485732	0.862280468618376
FBgn0001138	112.501403773856	-0.602188251371625	0.313394208728107	-1.92150408208107	0.0546681882339143	0.862280468618376
FBgn0001139	1628.33393277681	-0.257423446457966	0.274442846788093	-0.937985629688252	0.348251795157429	0.862280468618376
FBgn0001142	2459.88819827554	-0.352139568250279	0.377862423177124	-0.931925342799204	0.351375109460135	0.862280468618376
FBgn0001145	10319.3889219711	-0.126573959987838	0.124615580666837	-1.01571536488873	0.309764949116036	0.862280468618376
FBgn0001147	160.892822279314	-0.0822239719027539	0.171777849660234	-0.47866457791495	0.632177269135206	0.90887847883747
FBgn0001148	32.0738954101422	0.229290437794552	0.40615541137239	0.564538675035216	0.572387587184268	0.89137639634554
FBgn0001149	11813.4489368687	0.170105642744047	0.207081573521324	0.821442680058302	0.411394161192206	0.863505398638206
FBgn0001150	31.7130661705824	0.854561395906521	0.751801808126706	1.13668441159495	0.255670238213917	0.862280468618376
FBgn0001168	2463.66008553576	-0.300168195845683	0.254506366511305	-1.17941330883112	0.238233638158553	0.862280468618376
FBgn0001169	688.41684369765	-0.452757242502917	0.334206275940065	-1.35472393876922	0.175505527910126	0.862280468618376
FBgn0001170	14.7306283385184	0.028756098019748	0.508802343861516	0.0565172278914948	0.954929771587378	0.996806553116626
FBgn0001174	1.37747846194615	-0.516585210597193	1.66581216176956	-0.310110120728399	0.756477216179192	0.947820762446549
FBgn0001179	304.087516417996	-0.0643214361390989	0.152536402626159	-0.421679251848753	0.673259150734229	0.923182985396011
FBgn0001180	184.367416247531	-0.688213826662899	0.432272290054492	-1.59208406945572	0.111365816056409	0.862280468618376
FBgn0001185	283.111477314719	-0.387903253860912	0.260985334036441	-1.48630288093794	0.13719902504103	0.862280468618376
FBgn0001186	5226.43298536992	-0.349500250675493	0.220928677658175	-1.58195963683921	0.113658785151341	0.862280468618376
FBgn0001187	4537.35779331624	-0.00245064598087178	0.204997680498577	-0.0119545058993425	0.990461911493136	1
FBgn0001189	855.545549825607	-0.148068602528754	0.140308339682345	-1.05530863570888	0.29128419283675	0.862280468618376
FBgn0001197	1701.25258977617	-0.167852181526526	0.341817306917586	-0.49105817092812	0.623385305136655	0.905788140417906
FBgn0001202	812.798984042553	-0.0191766208469675	0.185857948687165	-0.103178911541983	0.917820976723001	0.985457544765757
FBgn0001206	233.363069517414	-0.212602490715769	0.357244983907355	-0.595116797415703	0.551765401259277	0.887258762237686
FBgn0001208	2065.53788616429	-0.244757880939606	0.162605070281749	-1.50522908366577	0.132265190285609	0.862280468618376
FBgn0001215	8960.29714503683	0.0778670060719052	0.143053910655149	0.544319310917785	0.586221760524035	0.895124897631296
FBgn0001216	5240.28638720211	0.164526905328178	0.213370710789606	0.771084769410594	0.440656687639474	0.868756628323753
FBgn0001217	8077.52134513823	0.317523672215736	0.25699050787511	1.23554630418507	0.216627254553942	0.862280468618376
FBgn0001218	15314.3004748455	-0.332296100824436	0.149290628889477	-2.22583361927185	0.0260253280180384	0.862280468618376
FBgn0001220	8199.03119661157	-0.00821826936350108	0.0986709870489151	-0.0832896235184812	0.933621250859366	0.989526755697971
FBgn0001222	1089.99884694098	-0.325451959834439	0.275275914956919	-1.18227546309445	0.237096418223871	0.862280468618376
FBgn0001223	0	NA	NA	NA	NA	NA
FBgn0001224	2358.11515628204	-1.01897458984343	0.521091766761808	-1.95546092807335	0.0505286907513341	0.862280468618376
FBgn0001225	9626.52757352806	-1.1802168940566	0.608178725058875	-1.94057576404428	0.0523097561505521	0.862280468618376
FBgn0001226	4278.62891638689	-1.19926737768323	0.655747730260086	-1.82885479025229	0.0674213644753118	0.862280468618376
FBgn0001227	284.495488664469	-0.14860074659071	0.137316683005999	-1.08217547451403	0.279174564075408	0.862280468618376
FBgn0001228	297.892824640398	0.174450626606595	0.184255963570303	0.946784154098945	0.343748777912528	0.862280468618376
FBgn0001229	432.161585678522	-1.57259402071722	0.644776503981738	-2.43897538295186	0.0147289715798328	0.862280468618376
FBgn0001230	8931.5278293927	-1.29932390609838	0.663032726208979	-1.95966783348315	0.0500346271865042	0.862280468618376
FBgn0001233	40247.5324125547	-0.3907731284646	0.335606136339412	-1.16438016517492	0.244269982108549	0.862280468618376
FBgn0001234	14202.5581490891	-1.08447131206419	0.478682338111569	-2.26553441754817	0.0234799044382813	0.862280468618376
FBgn0001235	1646.73207316177	-0.830909531723959	0.491127847108232	-1.69183958233353	0.0906765642376406	0.862280468618376
FBgn0001247	1804.17995706333	-0.128902003025866	0.15575344852829	-0.827602882914356	0.407895435057581	0.863505398638206
FBgn0001248	14368.6574144712	0.0246099599641092	0.189719199130482	0.129717814943881	0.896789687371302	0.976795836366143
FBgn0001250	2329.5712817986	-0.377439031568718	0.315778042838592	-1.19526686585249	0.231982781061163	0.862280468618376
FBgn0001253	10.0624051965761	-0.672731674566336	0.616255869743719	-1.09164343513045	0.274989856716596	0.862280468618376
FBgn0001254	1.33995876651174	1.15480081610579	2.10107615395254	0.549623493624154	0.582577641406471	0.894335532220657
FBgn0001255	33.7442581481844	0.427805445866516	0.289829672286314	1.47605813611761	0.139928286084713	0.862280468618376
FBgn0001256	4.15582278328424	-0.976491553737546	0.836995224023271	-1.16666323260931	0.243346396501684	0.862280468618376
FBgn0001257	3442.79532006303	-0.585413739800978	0.30941136531085	-1.89202403477598	0.0584877785487241	0.862280468618376
FBgn0001258	813.965702826047	0.279027435138743	0.171002764183157	1.63171301043931	0.102739957961071	0.862280468618376
FBgn0001259	45.3880686143656	0.0338675793410734	0.385462462491249	0.0878621983634588	0.929986201703112	0.988539563165411
FBgn0001263	3114.46294108506	0.259234333521396	0.297209241258344	0.87222837494498	0.383083802812748	0.862280468618376
FBgn0001269	349.232393690728	0.0974013113920637	0.249159003903552	0.390920295337861	0.695856151805528	0.930366275358612
FBgn0001276	112.459648686895	0.0456069753920663	0.249976617155703	0.182444965897187	0.855233540237938	0.96899960065263
FBgn0001280	2015.07066257897	0.275694585354757	0.188562452634051	1.46208633534167	0.143717552789151	0.862280468618376
FBgn0001281	4242.44015286257	0.247571472748322	0.243007953036501	1.01877930189032	0.308307754220606	0.862280468618376
FBgn0001285	621.976493225403	0.251222836631873	0.509011942054712	0.493549985522481	0.621624030105214	0.905788140417906
FBgn0001291	1631.85626909962	0.143902359589822	0.151787591443679	0.94805087966112	0.343103552832451	0.862280468618376
FBgn0001296	602.863540533583	-0.0969099808903575	0.158281052490079	-0.612265203988529	0.540362307443607	0.885297275953961
FBgn0001297	6535.50739280273	-0.477749312874744	0.266197812395709	-1.79471539820379	0.0726990559409401	0.862280468618376
FBgn0001301	1101.47821602726	-0.337020371068359	0.306147508200721	-1.10084309700602	0.270964951184455	0.862280468618376
FBgn0001308	2039.24753387502	-0.215814452258059	0.251004593621491	-0.859802799400167	0.389897755888467	0.862280468618376
FBgn0001311	160.674149456164	-0.345515208105205	0.317199087629704	-1.08926923682882	0.276035174569601	0.862280468618376
FBgn0001313	303.934731485343	-0.36340498391536	0.368583837333299	-0.985949320362477	0.324157982797641	0.862280468618376
FBgn0001316	2743.25011716682	-0.37912045899815	0.390935476132009	-0.969777577489875	0.332157371766963	0.862280468618376
FBgn0001319	68.7054454263183	-0.239459488838497	0.317495580966967	-0.75421361175862	0.450720965488312	0.871108747421259
FBgn0001320	187.869398229081	-0.247992899113221	0.285484711833557	-0.868673133214242	0.38502594060364	0.862280468618376
FBgn0001321	87.7403344557628	-0.210741751900001	0.229391195252268	-0.918700265144189	0.358252371107651	0.862280468618376
FBgn0001323	224.108085220056	-0.463070175531781	0.34886021375355	-1.32738030097899	0.184382912671511	0.862280468618376
FBgn0001324	1255.04388074942	0.114379285781519	0.227911265123136	0.501858851600519	0.615766811875345	0.903229022485364
FBgn0001325	38.6241275480041	-0.38027407513285	0.361373418710871	-1.05230228744938	0.292660882541644	0.862280468618376
FBgn0001330	188.263448909344	-0.231712953962638	0.290276873445188	-0.798248069894523	0.424726546995356	0.865018364870926
FBgn0001332	791.958177482017	-0.236354896928997	0.237705139196098	-0.994319675747577	0.320067259618234	0.862280468618376
FBgn0001341	270.003131577103	-0.168411357699056	0.253264318434753	-0.664962829110265	0.506074268070772	0.880871907382998
FBgn0001404	2064.38511637966	-0.360296140139039	0.212456215027433	-1.69586067459837	0.0899122686339643	0.862280468618376
FBgn0001491	685.197134613759	-0.0780808000474335	0.253868887935853	-0.30756348555465	0.758414508457931	0.947820762446549
FBgn0001565	1765.84700739975	-0.0609678697001204	0.103657968782535	-0.588163847084688	0.556422321235152	0.888404620818608
FBgn0001612	344.731286745493	-0.286622441230405	0.336024182454471	-0.852981589410579	0.393669513901181	0.862280468618376
FBgn0001624	3172.46842151626	-0.497502644171396	0.325357441833403	-1.52909563515113	0.126240737272308	0.862280468618376
FBgn0001941	1899.02925165318	-0.316017360952354	0.251590126004611	-1.25608014102494	0.209086915444736	0.862280468618376
FBgn0001942	22997.6005682541	-0.0110632774773976	0.0990303764605715	-0.11171599940148	0.911048593057025	0.983380804352158
FBgn0001961	2062.86350249599	0.200361424295625	0.23740364591351	0.843969449267093	0.398686477647221	0.862280468618376
FBgn0001965	913.980430863309	-0.214679193311629	0.370329756961626	-0.579697389356357	0.562118704183164	0.889825455846315
FBgn0001967	5.91448041949365	-0.0722040214860531	0.764523803473259	-0.094443130688708	0.924757155559293	0.987954864004704
FBgn0001970	199.600502109085	-0.120838387863219	0.169754799521519	-0.711840773891645	0.476563380687369	0.874613974724891
FBgn0001974	346.526514268499	-0.157790813319681	0.247755862504633	-0.636880240590595	0.524202854383826	0.881876796477609
FBgn0001977	973.949204452367	0.0419225140577272	0.117075874118605	0.358079872333538	0.720283541276163	0.937936810109036
FBgn0001978	1964.05216360571	-0.00412101635690714	0.190519924092086	-0.0216303695088357	0.982742807830313	1
FBgn0001981	145.350025580188	0.232192927366763	0.260838914080761	0.890177480553656	0.373370594565227	0.862280468618376
FBgn0001983	2.79111202375383	0.748132109066765	1.04806087414043	0.713825053034583	0.475335365887806	0.87431292713936
FBgn0001986	599.176542733942	-0.129173008261973	0.235548321647468	-0.548392819607091	0.583422205733335	0.894361847427529
FBgn0001987	590.407002291785	-0.519616764590383	0.388692237380118	-1.33683339830177	0.181277024722187	0.862280468618376
FBgn0001989	2366.92455760045	0.0877892531105077	0.264041411385127	0.3324828959593	0.73952465287708	0.944380343857452
FBgn0001990	233.410305373613	-0.148224233932302	0.240997359092359	-0.61504505481115	0.538524966470634	0.884967356333787
FBgn0001991	2527.14609697161	-0.313792919980346	0.316319278846867	-0.992013263068471	0.321191055562838	0.862280468618376
FBgn0001992	4.2046991927632	0.168601235345151	0.814547663029549	0.20698756254247	0.836019571818599	0.964174743488626
FBgn0001994	1230.79195684821	-0.321907484741925	0.31304474444116	-1.02831141700394	0.303803362260192	0.862280468618376
FBgn0001995	546.157916020686	-0.120322795092922	0.218433301246034	-0.550844557155665	0.581740236788848	0.894305198646305
FBgn0002021	626.060246091919	0.139769221264404	0.148781738182723	0.939424575701282	0.347512800130571	0.862280468618376
FBgn0002022	1631.18699367919	-0.0273229947519162	0.12122237697196	-0.22539563597434	0.821671506295803	0.960765297365538
FBgn0002023	452.126633946403	0.0242359387500246	0.153281580060205	0.158113836903987	0.874367097491944	0.970151593571103
FBgn0002031	3027.94356290596	0.168022949314104	0.21293988275393	0.789062843188789	0.4300752775592	0.865024529685467
FBgn0002036	2611.70449617821	0.187856742394203	0.142939588190465	1.31423872681015	0.188765879812629	0.862280468618376
FBgn0002044	1721.20463535837	-0.249653981048283	0.252348341305574	-0.989322853309235	0.322505206195027	0.862280468618376
FBgn0002069	1703.17575381863	-0.150654854830453	0.157927097155293	-0.953951902771381	0.340107989125099	0.862280468618376
FBgn0002121	1703.69040698741	-0.736464753205922	0.460107405278417	-1.60063660083949	0.109457430714243	0.862280468618376
FBgn0002174	3108.99736599939	0.280209292007921	0.275252113604816	1.01800959250842	0.308673397437498	0.862280468618376
FBgn0002183	1343.30909912402	0.0136673106558307	0.211965663036143	0.0644788899299235	0.948588915523718	0.995527833059428
FBgn0002283	544.559466222655	0.0637376172853715	0.177112256441614	0.35987129612559	0.718943383280711	0.937430651140941
FBgn0002284	2982.48412101043	0.126234237407575	0.221559521066374	0.569753160685694	0.568845128295125	0.89137639634554
FBgn0002306	801.359711206941	-0.17353844842802	0.226918667355175	-0.764760565759876	0.444414133648073	0.868898993853825
FBgn0002354	334.802581021479	0.181150695912059	0.276139184448741	0.656012279726586	0.511816223243807	0.880871907382998
FBgn0002413	1746.22584209484	-0.143904427497396	0.254119234263343	-0.566287034173367	0.571198673017861	0.89137639634554
FBgn0002431	3553.65700052416	-0.430935969177166	0.390753075924228	-1.10283448993433	0.270099047263909	0.862280468618376
FBgn0002440	4.53494962829624	-1.08756891195383	0.978722163919913	-1.11121312262713	0.266476624074813	0.862280468618376
FBgn0002441	1111.53079310258	0.0169327750466318	0.151928760850106	0.111452071035699	0.911257870504316	0.983476667961827
FBgn0002466	259.354986049497	-0.133629640550556	0.508992994476752	-0.262537288333266	0.792907241298371	0.95004556916597
FBgn0002521	1531.38019700497	-0.404972519432879	0.417899297659954	-0.969067241080664	0.332511641087334	0.862280468618376
FBgn0002522	104.968170773946	0.0825648128635153	0.185192478683124	0.445832430402257	0.655718293880671	0.918073083732087
FBgn0002524	880.306281254613	-0.306434793844712	0.254019440057842	-1.20634386791395	0.227684929698224	0.862280468618376
FBgn0002525	1388.09615982487	-0.190081273380285	0.313495461270572	-0.606328629479677	0.544296551055185	0.885297275953961
FBgn0002526	858.824777744643	-0.580098497069887	0.436631537738625	-1.32857672186095	0.183987656136391	0.862280468618376
FBgn0002531	14.5069116393614	0.229119913566103	0.437090429306292	0.524193389294155	0.60014403838371	0.900740128571488
FBgn0002533	4.49132056897639	0.92707022441489	1.26543463290705	0.732610124858964	0.463796254024336	0.872738829151699
FBgn0002534	3.65409487802343	0.360965254909751	0.933995470479113	0.386474309907077	0.69914542520859	0.931383057636908
FBgn0002535	1.26531676080017	0.683248184327751	1.87680616759579	0.364048347732681	0.715821906553759	0.936777213174396
FBgn0002542	650.132721854688	-0.0724098121465295	0.393706171661306	-0.183918407580417	0.854077463974249	0.968815043255987
FBgn0002543	186.577326933457	-0.347240346213211	0.685360768424139	-0.506653374706035	0.612398050723547	0.902338086698664
FBgn0002552	474.097233589488	-0.107593315776602	0.274505353227387	-0.391953433736779	0.695092620872937	0.929851132035743
FBgn0002561	1.06889399305935	-1.90301908519849	3.11541449145238	-0.610839774424791	0.541305658855506	0.885297275953961
FBgn0002562	12.0622096874889	0.226983693415946	0.887258475532695	0.255825894793136	0.798085277943866	0.951967907198609
FBgn0002563	1015.95504493425	0.260079111020369	0.716998808112254	0.362732975393804	0.716804364215359	0.936836156041658
FBgn0002564	177.853471900508	-0.312371908265978	0.269219279366503	-1.16028803360969	0.24593155488973	0.862280468618376
FBgn0002565	1859.13646022296	0.317341104638336	0.963975215455365	0.329200481039785	0.74200415936504	0.944874345859293
FBgn0002566	1511.38041064009	-0.351104825864225	0.288681609378529	-1.21623551503707	0.223895218292805	0.862280468618376
FBgn0002567	2002.5425032616	-0.134705474119413	0.167948719627463	-0.802063120327507	0.4225164468585	0.865018364870926
FBgn0002569	1172.32477494031	-0.129372681708279	0.171097142088144	-0.756135842652651	0.449567754076633	0.870150780823692
FBgn0002570	15463.5681155346	-0.0731033327970044	0.197282692999058	-0.370551170433148	0.710971857054892	0.93453135420965
FBgn0002571	1649.09344772821	0.199331135036812	0.237270455397901	0.840100950211163	0.400851787386976	0.862502688959859
FBgn0002573	83.7012329699988	-0.169996228987221	0.225800196778506	-0.752861296901236	0.451533267640096	0.871330352614604
FBgn0002576	47.4648443854995	0.48419446924011	0.274892444634701	1.76139606122513	0.0781713912333448	0.862280468618376
FBgn0002577	8.10965975627327	-0.647278771739779	0.611448297983738	-1.05859935153012	0.28978228236753	0.862280468618376
FBgn0002578	584.150810901545	-0.590755905898565	0.269149846808922	-2.19489593957659	0.0281710631643633	0.862280468618376
FBgn0002579	16337.2545928217	0.228601826771677	0.218711867493525	1.04521912501362	0.29592170622286	0.862280468618376
FBgn0002590	16842.6580038715	0.262945194750273	0.301259813824549	0.872818685679099	0.382761913075925	0.862280468618376
FBgn0002592	13.3430565066435	0.252601821330011	0.507949469797102	0.497297145385173	0.618979524491307	0.904888322669358
FBgn0002593	30414.5607831464	0.224387369955627	0.304470556961019	0.736975595260449	0.461137190616224	0.871330352614604
FBgn0002607	24012.5414034186	0.182613794500062	0.246671909619741	0.740310458461085	0.459111636429749	0.871330352614604
FBgn0002609	37.1719409894387	-0.533902556478297	0.476914016074102	-1.1194943710678	0.262929290948328	0.862280468618376
FBgn0002622	17583.5517525712	0.17326604467898	0.22388746238547	0.773897934403606	0.43899115120978	0.867489664718233
FBgn0002626	14072.2651996873	0.425160284283777	0.381247159330147	1.1151828253115	0.264772084310908	0.862280468618376
FBgn0002629	4.18126796070328	-0.72299023973322	1.36851874811382	-0.528301304406457	0.597290226419812	0.89992502088346
FBgn0002631	1.13842643253369	-2.29984157913519	2.28840615538589	-1.00499711282561	0.314898240099969	0.862280468618376
FBgn0002632	1.4448215213585	-1.23369882444703	1.82982587834804	-0.674216513737803	0.50017367229132	0.880396980528435
FBgn0002633	2.54298394431857	-0.190339465227521	1.21428393557696	-0.156750377445357	0.875441582330942	0.970440762224252
FBgn0002638	1271.83081626933	-0.0731465491777872	0.277307485833976	-0.263774160145031	0.791953946818318	0.95004556916597
FBgn0002641	420.004023206005	-0.18582089807885	0.251816827871453	-0.737920891346102	0.460562522967675	0.871330352614604
FBgn0002643	1493.58669472738	-0.16178102306786	0.398978413468469	-0.405488160779018	0.685118719217989	0.927119049178794
FBgn0002645	2786.56579885478	-0.534366468667455	0.401394914067381	-1.33127364084576	0.183098988174106	0.862280468618376
FBgn0002673	1190.55455855953	0.0186455915452742	0.184934505669693	0.100822674912688	0.919691226579709	0.986138939316908
FBgn0002707	105.776024922577	-0.173495175699614	0.349510116430724	-0.496395290274816	0.619615547293608	0.90507352214699
FBgn0002709	18.1526705620077	-1.05548183714198	0.700980440347202	-1.50572223758368	0.132138492892748	0.862280468618376
FBgn0002715	957.112572889187	0.147602986181654	0.164226551914837	0.898776625707857	0.368771652782616	0.862280468618376
FBgn0002716	38.3663291323131	-0.29117565531533	0.30850371645047	-0.943831920942443	0.34525554575046	0.862280468618376
FBgn0002719	16110.220257325	-0.031737883343132	0.243101556904224	-0.130554011036778	0.896128125118778	0.976648284348908
FBgn0002723	475.048252209469	-0.451881022191224	0.374240778825986	-1.20746067173332	0.227254782152873	0.862280468618376
FBgn0002732	21.1839505890875	0.0723321310578886	0.423824590443629	0.17066525324115	0.864486985823502	0.970151593571103
FBgn0002733	116.806079985329	0.0794310461725527	0.234780903667185	0.338319875815584	0.735122147169607	0.943601248572855
FBgn0002734	0.939794133915609	-1.38963272986496	2.69083539837443	-0.516431711395076	0.605552922328281	0.901676720310392
FBgn0002735	2.69674589653892	-2.29348081700161	2.12966605359715	-1.07692039938739	0.281515828800241	0.862280468618376
FBgn0002736	498.934998634538	-0.137777003862205	0.24907529019617	-0.553154043316351	0.580157932907638	0.894305198646305
FBgn0002772	11810.2678921752	-0.27233056832227	0.207442470181457	-1.31280045057337	0.18925019817921	0.862280468618376
FBgn0002773	34631.1016418682	-0.48147685486567	0.24186668872816	-1.99067038705282	0.0465171363774375	0.862280468618376
FBgn0002774	1076.14822706273	0.0195481588837973	0.193173398496721	0.101194880019306	0.919395761008643	0.985979473624962
FBgn0002775	361.391619156106	0.00589917502621604	0.155631168243115	0.0379048431802608	0.969763551526444	0.999335904544736
FBgn0002778	564.500622520923	-0.167943417301578	0.235597866310385	-0.712839296601791	0.475945205828344	0.874543640863165
FBgn0002780	2102.20817476032	-0.51117346980033	0.352716002442676	-1.44924944221494	0.147267934527474	0.862280468618376
FBgn0002783	905.065725577444	-0.315569692420964	0.355499508447814	-0.887679687093824	0.374713075445366	0.862280468618376
FBgn0002787	2148.35299610243	0.0214184475041003	0.0964952920618992	0.221963652800397	0.824342178408667	0.961575275483501
FBgn0002789	8106.79588643631	0.0538936167135123	0.224073358495744	0.240517735242211	0.809928915993203	0.9567889361993
FBgn0002791	874.946354278063	0.0386059736107218	0.180748044250586	0.213589993578017	0.830866803302461	0.96394780209328
FBgn0002838	145.54597400586	0.512159463303528	0.278139244910553	1.84137791654764	0.0655661966905133	0.862280468618376
FBgn0002842	357.140834429005	0.536372189545029	0.392081549164082	1.36801180950385	0.171308379582568	0.862280468618376
FBgn0002855	12119.4610344174	0.267000062151557	0.31524802042507	0.846952383052377	0.397021663041741	0.862280468618376
FBgn0002856	4695.1113583804	0.428556735448994	0.405980335642488	1.05560958949102	0.291146617952186	0.862280468618376
FBgn0002862	21071.5750411674	0.788618116348872	0.455908890392328	1.72977130511808	0.083671143138395	0.862280468618376
FBgn0002863	38000.0738603183	0.600412483660244	0.534950219017214	1.12237075958823	0.261704831660258	0.862280468618376
FBgn0002865	17326.0206142795	0.42258913491526	0.374999713516685	1.12690522067948	0.25978255582864	0.862280468618376
FBgn0002868	30183.5783568961	-0.085674301512799	0.40130786509716	-0.21348772093479	0.830946565641023	0.96394780209328
FBgn0002869	237.251944908659	-0.474877644198028	0.453047111739778	-1.04818600956182	0.29455291507182	0.862280468618376
FBgn0002872	316.129190387817	-0.271456930228272	0.49171648623078	-0.552059851214481	0.580907347948761	0.894305198646305
FBgn0002873	2864.45712300286	-0.110551156283626	0.355014620104455	-0.311398883378658	0.755497402671035	0.947820762446549
FBgn0002878	243.196592226275	-0.000886029247595655	0.328081026954804	-0.00270064153303724	0.99784520243585	1
FBgn0002887	372.412287395886	-0.197552788223882	0.289979570132371	-0.681264504715632	0.495704138804073	0.879632325379337
FBgn0002891	292.484496189479	-0.148436093452428	0.287236877069255	-0.516772410865053	0.605315041323672	0.901676720310392
FBgn0002899	143.655537446635	-0.535236017546134	0.481903135927637	-1.11067137281818	0.266709828772587	0.862280468618376
FBgn0002901	253.434715493997	-0.126563991721707	0.198176799386647	-0.638641819392686	0.52305596951345	0.881876796477609
FBgn0002905	248.479176898559	-0.0996865769873385	0.231247884666031	-0.431081032941366	0.666409451319651	0.92150521012426
FBgn0002906	357.807712451083	-0.726890101713274	0.479182999152564	-1.51693633329809	0.129282759174426	0.862280468618376
FBgn0002909	0	NA	NA	NA	NA	NA
FBgn0002914	1696.7528171122	-0.124675131280212	0.217226261236181	-0.57394133918577	0.566007497631072	0.890231605529048
FBgn0002917	773.402788226938	0.0414110852334936	0.328430876575333	0.126087673806135	0.89966252447594	0.978345237960451
FBgn0002921	31100.7494458215	-0.354750258630726	0.271151579507423	-1.30830976266179	0.190768265165928	0.862280468618376
FBgn0002922	100.287496196369	-0.0790020309283372	0.224499699857115	-0.351902612692216	0.724911299731926	0.939995840035219
FBgn0002924	407.537870102833	0.238690277004451	0.170601825589866	1.39910740215801	0.16178077833653	0.862280468618376
FBgn0002926	13.9994427379528	-0.363667060015424	0.766546125325028	-0.47442293164188	0.635198343622717	0.909143540896539
FBgn0002930	2416.19985633627	-0.0616689999271115	0.133186120975302	-0.463028726082858	0.643343776743474	0.912556149538419
FBgn0002931	324.301609783237	-0.183702924653367	0.173934545843144	-1.05616123446249	0.29089455816278	0.862280468618376
FBgn0002932	469.639721637885	-0.694841434473046	0.434080878316802	-1.60071882725489	0.109439209242197	0.862280468618376
FBgn0002933	1.54490656469167	-0.186423350506983	1.32281817320189	-0.140928930584424	0.887926086927968	0.973737547016509
FBgn0002936	885.884441563557	0.690566211080122	0.451065585135777	1.5309663025439	0.125777721091709	0.862280468618376
FBgn0002937	599.862875142046	0.25539125491516	0.31157968183669	0.8196659467963	0.412406567870184	0.863505398638206
FBgn0002938	9074.51754926518	0.035142469130529	0.171300465936293	0.205151042283787	0.837454118433441	0.96424046281225
FBgn0002939	770.192849933482	0.316107835003377	0.251895811976245	1.25491500840509	0.209509615059498	0.862280468618376
FBgn0002940	88664.2538161559	0.284624515488152	0.220949558525416	1.28818775374657	0.197680613866008	0.862280468618376
FBgn0002941	62.775122429357	0.0818278961666596	0.286271577838375	0.285840099057471	0.775000594238974	0.947820762446549
FBgn0002945	835.97785098905	0.0337042585393414	0.388291390049667	0.0868014573669281	0.930829329186964	0.988604032407453
FBgn0002948	131.053036943003	-0.765092608963513	0.576489898700212	-1.32715700776117	0.184456750663399	0.862280468618376
FBgn0002962	134.277848826154	-1.64582708810124	1.1272714560029	-1.46000954724521	0.144287450051282	0.862280468618376
FBgn0002973	2213.94839956869	-0.251018577911419	0.220010739045708	-1.140937842399	0.253895790220439	0.862280468618376
FBgn0002985	251.896910039245	-0.196627594091227	0.245340720066242	-0.801447040826069	0.422872891538705	0.865018364870926
FBgn0002989	132.191037500868	-0.336584786725642	0.295877540241457	-1.13758140090987	0.255295316596497	0.862280468618376
FBgn0003002	38.2507947646762	-0.391966468020101	0.357550402583389	-1.09625514385678	0.272967133475805	0.862280468618376
FBgn0003008	350.037171638879	0.0681129546019514	0.166361807039418	0.409426633516987	0.682226597586572	0.92620664125531
FBgn0003009	576.88925743369	0.084637477988859	0.18246547687126	0.4638547490744	0.642751814940443	0.912556149538419
FBgn0003011	69.4457882487676	-0.271065609435871	0.219778716032195	-1.23335696162755	0.217442614698408	0.862280468618376
FBgn0003015	448.542664846134	-4.65513697401385	1.99987034824023	-2.32771938346409	0.0199270091989763	0.862280468618376
FBgn0003016	1210.81608780667	-0.366773966639565	0.442341283031486	-0.82916512816973	0.407010974502496	0.863505398638206
FBgn0003023	171.515582239703	-2.7319980366988	1.38959518582071	-1.96603878926455	0.0492941301049503	0.862280468618376
FBgn0003028	403.482091425396	-0.767590062003856	0.632378206019059	-1.21381485746636	0.224818431468762	0.862280468618376
FBgn0003034	14429.5050628025	0.891550656777134	0.545704543654964	1.63376073581099	0.102309099787945	0.862280468618376
FBgn0003041	649.989489376299	-0.389618083119953	0.429486462596311	-0.907171976421916	0.364315860541003	0.862280468618376
FBgn0003042	213.20592814532	-0.198145431228936	0.287853553292464	-0.688354994970711	0.491229257515148	0.878396178577716
FBgn0003044	660.478867505	-0.158506908985677	0.331694099735928	-0.477870752334364	0.632742199464559	0.909034005527079
FBgn0003046	12.1523521593624	0.120891739484661	0.573419918774767	0.210825845992535	0.833023169615933	0.96394780209328
FBgn0003048	1330.20568430751	-0.330743890100863	0.524941901292934	-0.63005808697351	0.528656580597608	0.883873095228112
FBgn0003053	1617.04738893744	-0.215685828424997	0.418022443358117	-0.51596710141283	0.605877386796441	0.901676720310392
FBgn0003057	0.60591955215111	-2.2434329055492	3.36118026196537	-0.667453909251926	0.504482240960701	0.880871907382998
FBgn0003060	17.896999288351	0.726784685065272	0.791314364566766	0.918452536196758	0.358381996998569	0.862280468618376
FBgn0003062	842.449416228819	0.208277177261235	0.230169004330228	0.904888031589241	0.36552470820499	0.862280468618376
FBgn0003065	5.34165093264227	0.683417480903752	0.854372651775122	0.79990561435203	0.423765484681211	0.865018364870926
FBgn0003067	0	NA	NA	NA	NA	NA
FBgn0003068	442.081160971291	-0.0713536453297354	0.156212196322825	-0.456773843588227	0.647833608022593	0.914009085958084
FBgn0003071	8589.70714669403	0.0462872135361392	0.163271762640925	0.283497971648264	0.776795136305131	0.947820762446549
FBgn0003074	13645.4057795722	0.0354505338281678	0.167112485623538	0.21213575811462	0.832001123548201	0.96394780209328
FBgn0003076	8012.06774874634	-0.0118329312630588	0.156892315063717	-0.0754207193529726	0.939879974498072	0.992011331477137
FBgn0003079	435.535679285617	-0.161807434658168	0.258351116681074	-0.62630824568068	0.531112778938247	0.884323471079562
FBgn0003082	183.365374940119	0.579886828767372	0.328791703734112	1.76369057424975	0.077784088925121	0.862280468618376
FBgn0003086	0.344280794617471	0.046947216369059	3.73126257998326	0.012582126120234	0.989961180701366	1
FBgn0003087	447.85029300722	-0.0856001743947681	0.243866750937669	-0.351012075511053	0.725579289155889	0.940372572717444
FBgn0003089	160.602328733739	0.358095635285791	0.23615471439153	1.51636030730299	0.129428269986212	0.862280468618376
FBgn0003090	242.724761368625	0.00292200584052258	0.276364238523376	0.0105730244120403	0.991564104234108	1
FBgn0003091	1238.23765167582	-0.15842218643275	0.20057815941651	-0.78982770055128	0.42962839935587	0.865018364870926
FBgn0003093	1846.72853515537	-0.406253643800635	0.308762894363471	-1.31574632579522	0.188259199816749	0.862280468618376
FBgn0003114	23.5087855107272	-2.67790501681708	1.20123153617965	-2.22929962805821	0.0257939753831635	0.862280468618376
FBgn0003116	529.32059779396	-0.198593495188298	0.228470037706078	-0.869232119809884	0.384720182339187	0.862280468618376
FBgn0003117	29.8169060707093	-0.539384408644176	0.369423869643215	-1.46006918601418	0.144271060286848	0.862280468618376
FBgn0003118	402.839760551457	-0.387564720167267	0.393088290626745	-0.985948270169354	0.324158498170423	0.862280468618376
FBgn0003124	2088.95636285466	-0.0184424115344087	0.257669277415404	-0.0715739638011892	0.942940960796283	0.993559833709372
FBgn0003129	184.635385081017	-0.315863147100825	0.178967908609276	-1.76491500378663	0.0775780516820618	0.862280468618376
FBgn0003130	8.49975078019522	0.0929757104216135	0.664454429027939	0.139927896270677	0.888716960083258	0.974152156568168
FBgn0003132	2023.02665987648	0.149542531791135	0.152971978804583	0.977581207746365	0.328281495468971	0.862280468618376
FBgn0003134	3797.28707591472	-0.394170640666545	0.226426064986565	-1.74083597968253	0.0817123332222464	0.862280468618376
FBgn0003137	2366.01235745952	-0.635281943014375	0.471331376205724	-1.3478456455169	0.177708033304905	0.862280468618376
FBgn0003139	477.817864327434	-0.365243680517007	0.257613902886814	-1.41779491100479	0.156250650370827	0.862280468618376
FBgn0003140	709.737337347074	0.23911788883154	0.163069608204427	1.46635471480239	0.142551676620389	0.862280468618376
FBgn0003141	875.214345908873	-0.115840787070613	0.190697863352431	-0.607457184019551	0.543547548767133	0.885297275953961
FBgn0003145	879.943200544301	0.414332578427936	0.329216998278401	1.25853944539509	0.208196731030513	0.862280468618376
FBgn0003149	11628.9718402736	-0.518362074116826	0.271698989641301	-1.90785425739408	0.0564100558155317	0.862280468618376
FBgn0003159	3226.97835965537	-0.0868625435063499	0.19978390339825	-0.434782492627536	0.66372031390229	0.920364816686905
FBgn0003162	1379.95447530522	-0.529571422808639	0.266108868512147	-1.9900555203949	0.0465848198334585	0.862280468618376
FBgn0003165	2562.07877276956	-0.258615786304484	0.339311199564084	-0.762178751060179	0.445953326405506	0.868898993853825
FBgn0003169	938.595865046011	-0.358058880381328	0.346882940397328	-1.03221818856586	0.301969916271714	0.862280468618376
FBgn0003174	55.7807131805154	-0.357269127253279	0.403220810244096	-0.886038414130958	0.375596827508889	0.862280468618376
FBgn0003175	1864.85969385182	-0.200502917272271	0.342306341961064	-0.58574117009809	0.558049463045349	0.888872464403908
FBgn0003187	2980.51618062347	-0.132590958268446	0.241906339548951	-0.548108654430761	0.583617298444134	0.894361847427529
FBgn0003189	959.126788127033	-0.0565275438356808	0.296543514425463	-0.190621413336926	0.848822212395209	0.967231224150112
FBgn0003204	1322.82482214813	-0.249705120828993	0.216050260295991	-1.15577329315361	0.247773899727636	0.862280468618376
FBgn0003205	1120.91276597692	-0.415955383637811	0.334469675798819	-1.24362659378426	0.213637023864167	0.862280468618376
FBgn0003206	1007.02154395079	-0.221218963187206	0.215772026635884	-1.02524394211912	0.305248099085367	0.862280468618376
FBgn0003209	1466.16360869726	-0.443349532491227	0.362841372918865	-1.22188252382775	0.221752055166354	0.862280468618376
FBgn0003210	920.333893458457	-0.372963105941471	0.315244273365747	-1.18309240627746	0.236772527054369	0.862280468618376
FBgn0003218	4056.73078179858	-0.0522496728726398	0.178698297482115	-0.292390434653522	0.76998812089547	0.947820762446549
FBgn0003227	23.2375156062624	-0.288139048534205	0.349068032494706	-0.825452409591747	0.409114790726808	0.863505398638206
FBgn0003231	9357.78141803077	-0.455695122116521	0.305268627879199	-1.49276761677865	0.135498026777998	0.862280468618376
FBgn0003248	549.054104804787	-0.0146227869749366	0.232233394193593	-0.0629659099016004	0.949793650390186	0.995776982379026
FBgn0003249	3992.74294463578	0.416927677640604	0.34488265047457	1.20889722074131	0.226702334049793	0.862280468618376
FBgn0003250	3290.13033109138	0.430736354133687	0.272245376465329	1.58216223807402	0.113612538459594	0.862280468618376
FBgn0003254	505.045062198341	0.0253464865743367	0.280885118322456	0.0902379119467587	0.928098157828026	0.988484846012707
FBgn0003255	57.201877597376	0.0637394259603586	0.306694025409905	0.207827413250613	0.835363727242723	0.964174743488626
FBgn0003256	1323.62521170666	-0.690105084066358	0.626641266250597	-1.10127615468973	0.270776485972664	0.862280468618376
FBgn0003257	292.109033155032	-0.495350288676134	0.304302586864753	-1.62782148446307	0.103562743591544	0.862280468618376
FBgn0003261	12066.1486816989	-0.212183296459863	0.199836258815573	-1.06178577259938	0.288332950121185	0.862280468618376
FBgn0003267	20.5803501973002	0.700408680551918	0.837435406670699	0.836373378737899	0.402944884089661	0.86279814546527
FBgn0003268	229.216785840827	-0.223773275135347	0.365854700092392	-0.611645210732117	0.540772518849383	0.885297275953961
FBgn0003270	0.187506579248633	-1.75449146846979	3.81151627214869	-0.460313256771357	0.645291387076117	0.913025803135081
FBgn0003274	22384.1104421683	-0.0940290857125947	0.228203380458506	-0.4120407222876	0.680309575648633	0.925930708713507
FBgn0003275	1494.73605504264	0.460304927288132	0.327637590751766	1.40492098672793	0.160044775148462	0.862280468618376
FBgn0003277	1232.68350974517	-0.435374017301351	0.424381379647974	-1.02590273320308	0.304937434204636	0.862280468618376
FBgn0003278	189.875018979903	-0.199619417342997	0.262050466267791	-0.761759443461566	0.446203590056928	0.868898993853825
FBgn0003279	22633.3120976416	0.142994626349343	0.242137245168039	0.590551966716676	0.554820656716768	0.888034947207624
FBgn0003285	152.333339380168	-0.449627937683543	0.279519841973861	-1.60857252389828	0.107709846205734	0.862280468618376
FBgn0003292	81.8918952755395	-0.272740702617442	0.392041629641821	-0.695693217239774	0.486620974166741	0.877334535643033
FBgn0003295	65.7591007756304	0.262408400845141	0.290130551256047	0.904449392554868	0.365757157644354	0.862280468618376
FBgn0003300	21.897107181865	0.114002267544606	0.391755442549896	0.291003659840887	0.771048520436707	0.947820762446549
FBgn0003301	2113.01046146955	-0.140690120356578	0.385975240663294	-0.364505557700549	0.715480524403743	0.936766149142567
FBgn0003302	1112.07966967978	0.129837908171248	0.150642602564219	0.861893687185192	0.388746023188001	0.862280468618376
FBgn0003308	983.578678555564	0.116168174367076	0.340531781355294	0.34113754053949	0.733000041179962	0.942989652725057
FBgn0003310	867.60020561842	-0.231205495421848	0.201337811949507	-1.14834612129306	0.250825706389444	0.862280468618376
FBgn0003312	22.1517653132788	0.453394931569887	0.420853537760076	1.07732237201333	0.281336270957395	0.862280468618376
FBgn0003313	0	NA	NA	NA	NA	NA
FBgn0003317	738.590754493881	-0.365038319799014	0.249896248473495	-1.46075950330935	0.144081453007784	0.862280468618376
FBgn0003319	7.09047405015384	-0.416011963086403	0.728287638789298	-0.571219310790417	0.567850989746149	0.891023535299144
FBgn0003321	2055.72564461233	-0.0145391999236925	0.102116497420259	-0.142378560673273	0.886780995959292	0.973282982201362
FBgn0003326	119.776379934279	-0.0384771707984538	0.2441405613733	-0.157602532664045	0.874770007740161	0.970306056694923
FBgn0003328	1108.88708896407	-0.395709929560632	0.378928444812724	-1.04428668519778	0.296352771245399	0.862280468618376
FBgn0003330	274.430788833797	0.0647196942525422	0.195045420797822	0.331818578399893	0.740026254819701	0.944485337335226
FBgn0003334	1057.20553068643	-0.32923674918471	0.361652456260439	-0.91036779506238	0.362628575924183	0.862280468618376
FBgn0003339	221.252735515421	-0.215064102992016	0.302515310363773	-0.710919730751485	0.477133978482086	0.874767111949558
FBgn0003345	1095.73684790919	-0.313349648175227	0.301468048393372	-1.03941246790556	0.298612947949722	0.862280468618376
FBgn0003346	772.879317217598	-0.0518018270693225	0.310396043076618	-0.166889456952696	0.867457028940595	0.970151593571103
FBgn0003353	343.756174095559	0.0335148085435974	0.189866835932603	0.176517443812537	0.859887445664748	0.970151593571103
FBgn0003356	26527.3912289836	0.299967452261184	0.506644776934424	0.592066603501193	0.553805989276362	0.887811817832477
FBgn0003357	18721.5832376889	0.155981547681313	0.433386284608414	0.359913438013503	0.718911867462107	0.937430651140941
FBgn0003358	5416.91369260758	0.173355145915245	0.160107884968525	1.08273959117831	0.278924025581729	0.862280468618376
FBgn0003360	37752.9892817629	-0.294232692600912	0.214125192943218	-1.37411524798456	0.169405906407591	0.862280468618376
FBgn0003366	2096.25811967903	-0.0709156680515033	0.407819690921468	-0.173889759690783	0.861952100605731	0.970151593571103
FBgn0003371	4147.42075795004	-0.245947359099324	0.36059519069715	-0.682059454602891	0.495201357051832	0.879632325379337
FBgn0003372	7.20249429738739	-0.222103577010088	0.664294031684213	-0.33434528449244	0.738119022509142	0.94383757117881
FBgn0003373	0.659931444074088	-1.83257643328212	2.6594798050022	-0.689073265318744	0.490777163079246	0.878396178577716
FBgn0003374	2.03027802671386	-1.38694762128308	1.43796233099198	-0.964522916484392	0.334783824765577	0.862280468618376
FBgn0003375	2.4950396033047	-0.0538104507237137	1.08434466796469	-0.0496248585099014	0.960421336807242	0.997951104871588
FBgn0003377	1.63981908398829	-0.446342916650128	1.66190950231823	-0.26857233563411	0.788258803294655	0.94950572547475
FBgn0003378	0.255377253318887	0	3.81693625647621	0	1	1
FBgn0003380	2381.77987427899	-0.627965545386123	0.353043010724946	-1.77872249643647	0.0752852690798551	0.862280468618376
FBgn0003382	19.3981540296682	0.29903637588016	0.389024427259038	0.768682773950957	0.442081653522802	0.868898993853825
FBgn0003386	815.59498631459	-0.275572315602512	0.270656075476786	-1.01816415950415	0.308599948837967	0.862280468618376
FBgn0003388	162.771301110524	-0.479929820967694	0.302760565258282	-1.58517943232888	0.112925572194689	0.862280468618376
FBgn0003390	484.792328826771	-0.41648798948401	0.278153853472361	-1.49732956881503	0.134307524642067	0.862280468618376
FBgn0003391	1030.14866374703	-0.499613550531738	0.485352838486927	-1.02938215441218	0.303300131590626	0.862280468618376
FBgn0003392	4867.50002995185	-0.224680185331557	0.254222743168251	-0.883792624261228	0.376808168687799	0.862280468618376
FBgn0003396	1812.30117742118	-0.401044811915145	0.469976888148005	-0.853328795582917	0.393476995735808	0.862280468618376
FBgn0003401	53.4502464240616	-0.222845291918972	0.616052210977138	-0.361731177890769	0.717552925996803	0.937146390631563
FBgn0003410	2088.06521564783	0.206281148081464	0.184413786825217	1.11857769222521	0.263320344699222	0.862280468618376
FBgn0003411	31.5937023001274	-0.409764578020094	1.13161426761699	-0.362106231554499	0.717272647094557	0.936954345166081
FBgn0003415	2271.77996046537	-0.273422164172401	0.417872140237464	-0.65432015644073	0.512905562488733	0.880871907382998
FBgn0003416	406.256742709152	-0.692279736450771	0.505002447290295	-1.37084431999361	0.170423491635095	0.862280468618376
FBgn0003423	4671.5261078364	-0.201079289979217	0.192462827744536	-1.04476948788323	0.296129520125099	0.862280468618376
FBgn0003429	3068.37894262834	-0.335988695413261	0.321384046323328	-1.04544298093515	0.295818280595327	0.862280468618376
FBgn0003430	64.7243353719916	0.0538788888883868	0.379997354532992	0.141787536796415	0.887247828801545	0.97345669591934
FBgn0003435	15697.6122128926	-0.0390859158089048	0.20155530051239	-0.193921547632542	0.846237311387012	0.966916649385427
FBgn0003444	265.736863487369	-0.583859878956225	0.43881937683278	-1.33052437923386	0.183345559370766	0.862280468618376
FBgn0003447	472.073962384072	-0.470918456098493	0.41437097736562	-1.13646582850077	0.255761659046687	0.862280468618376
FBgn0003448	2.01675087982522	-0.696235958095835	1.5763583323645	-0.441673662517773	0.658725370951918	0.91956758068858
FBgn0003449	613.952486586649	0.205048958899714	0.210866416723827	0.972411643757706	0.330845801598784	0.862280468618376
FBgn0003450	14.1499218185422	0.0731160867471281	0.547920929402909	0.133442770340614	0.89384322200734	0.975899350107853
FBgn0003459	382.996696922174	-0.229905096998259	0.27208960633864	-0.844960967425276	0.398132632487168	0.862280468618376
FBgn0003460	388.869532298233	0.13987109837243	0.178977101043736	0.781502759608614	0.434506854286396	0.866035528027171
FBgn0003462	11116.2805151924	-0.0810040190009813	0.12777631686089	-0.633951744666189	0.52611231470409	0.881876796477609
FBgn0003463	1128.33131489075	-0.467945904802189	0.380367400196225	-1.23024713621825	0.218604573610408	0.862280468618376
FBgn0003464	1184.11325111191	-0.00942755258629278	0.230949676781393	-0.0408208087479442	0.967438750201859	0.999335904544736
FBgn0003475	4507.02858566991	0.0631198237764407	0.12771217390841	0.494234980462454	0.621140238042684	0.905788140417906
FBgn0003479	200.021823037711	0.166164910539587	0.168494336954383	0.986175046254362	0.32404722224055	0.862280468618376
FBgn0003480	51.8357419020471	0.278096029559664	0.324381521308643	0.857311564597606	0.391272718933194	0.862280468618376
FBgn0003482	14.9487504941191	-0.816716315589566	0.821160902716085	-0.994587434555374	0.319936961334157	0.862280468618376
FBgn0003483	248.028652222006	-0.485144288925866	0.544774985895726	-0.890540684661184	0.373175632704355	0.862280468618376
FBgn0003486	2.20873507350387	-3.72947267756098	1.86708112402809	-1.99748828776916	0.0457721655195697	0.862280468618376
FBgn0003495	480.587337991024	-0.345051172381444	0.345594650108812	-0.998427412787792	0.318072146397874	0.862280468618376
FBgn0003499	287.85702621655	-0.337420830873493	0.300095775696973	-1.12437714289657	0.26085306449836	0.862280468618376
FBgn0003502	829.870263402306	-0.445799785935233	0.423627510925488	-1.05233908194797	0.292644006962176	0.862280468618376
FBgn0003507	1113.13717708764	-0.0492206947997349	0.3299725318694	-0.149166036702764	0.881422618905694	0.971242308104479
FBgn0003510	0	NA	NA	NA	NA	NA
FBgn0003511	0	NA	NA	NA	NA	NA
FBgn0003512	364.757863236439	-0.000962978610725425	0.148566682692757	-0.00648179385358501	0.994828312971519	1
FBgn0003513	130.18810822486	-0.31830675848776	0.287577266453725	-1.10685647169882	0.268355987968273	0.862280468618376
FBgn0003514	2049.13477101495	-0.06516773422472	0.126609779268521	-0.514713275713945	0.606753395091118	0.901676720310392
FBgn0003515	620.928202529785	0.165699076713848	0.308477513585624	0.537151232800814	0.591163154085908	0.897780840459067
FBgn0003517	24884.7898490148	0.357203492354082	0.365541057450656	0.977191166555347	0.328474520354121	0.862280468618376
FBgn0003520	2020.49347398399	-0.322849928123752	0.380792720719511	-0.847836396435637	0.396529090267699	0.862280468618376
FBgn0003525	181.286563171794	-3.09148703133899	1.40473090096737	-2.20076815367985	0.027752441179058	0.862280468618376
FBgn0003527	407.004736323279	0.199941632071359	0.179823457919117	1.11187736230326	0.26619088322485	0.862280468618376
FBgn0003545	851.872279631702	0.128710260566085	0.15263826750149	0.843237168980763	0.399095814621503	0.862452500863718
FBgn0003557	1991.05389536641	-0.39198112232823	0.297655481668008	-1.31689535879413	0.187873702433576	0.862280468618376
FBgn0003559	581.296972597783	-0.14994078349124	0.122190354318695	-1.22710818155226	0.219781933202533	0.862280468618376
FBgn0003567	558.538449277796	-0.162286383257293	0.411114785744181	-0.394747133610214	0.693029514105025	0.929200127588175
FBgn0003575	1080.15798494325	-0.183548444019641	0.270433103882178	-0.678720324489596	0.497315085710807	0.880108983179745
FBgn0003598	607.016764664589	-0.548937791685214	0.372099737779303	-1.47524369396572	0.140147038216619	0.862280468618376
FBgn0003607	1367.40475925864	-0.0873057564833425	0.147510872294804	-0.591859807518865	0.553944470000839	0.887811817832477
FBgn0003612	1721.30514830137	-0.171665037791769	0.242575578860689	-0.70767650477444	0.479146171188181	0.875246975920428
FBgn0003638	5445.26435853718	0.335289863598551	0.299073971822112	1.12109342566922	0.262248096823069	0.862280468618376
FBgn0003651	1132.08188954669	-0.294002764352248	0.289551122086126	-1.01537428773907	0.309927444841636	0.862280468618376
FBgn0003654	653.937657179575	-0.143090822809483	0.203687496215825	-0.702501751299773	0.482366309933809	0.87636988870685
FBgn0003655	164.078672277327	-3.12854720393965	1.2830828618661	-2.43830488031734	0.0147563225917261	0.862280468618376
FBgn0003656	4852.57958534171	-0.140468593586804	0.278478802526242	-0.504413952920412	0.613970515092216	0.902338086698664
FBgn0003660	2959.96999723296	-0.00831202073533397	0.151323115278014	-0.0549289559632906	0.956195063173745	0.997232234149335
FBgn0003676	1381.52031200754	-0.0136371872564148	0.148799989883171	-0.0916477700510725	0.926977896116357	0.988144395427522
FBgn0003683	1.47760956886223	-0.287897250467221	1.65914211446729	-0.173521754379467	0.862241329723151	0.970151593571103
FBgn0003687	179.431941504264	-0.204264397872024	0.192090610339318	-1.06337523479779	0.287611818989467	0.862280468618376
FBgn0003701	275.706007148497	-0.112149722948312	0.449473339048582	-0.249513626738582	0.802963501553811	0.953848721262073
FBgn0003710	378.363819769436	-0.0922736932196614	0.204288333185244	-0.451683616880802	0.651496922344775	0.915357729840781
FBgn0003714	289.950274414748	-0.02523589514944	0.267426241958128	-0.0943658145313624	0.924818570644963	0.987954864004704
FBgn0003716	1481.06230592312	-0.408762845303557	0.365220303868356	-1.11922267457205	0.26304515441839	0.862280468618376
FBgn0003719	50.412679664908	0.503599685470501	0.322470150275639	1.56169395846418	0.118360102735724	0.862280468618376
FBgn0003720	0.241053378169029	2.05776367177937	3.72674825342714	0.552160632231341	0.58083830382323	0.894305198646305
FBgn0003721	13248.4944126987	-0.291426443734239	0.194507540171991	-1.49827838795631	0.134060936743253	0.862280468618376
FBgn0003731	2091.38809733493	-0.278944699393099	0.38600540427764	-0.722644544096755	0.46989829415794	0.8737856516112
FBgn0003732	1432.8044586379	-0.421491361473041	0.445338081690453	-0.946452546508279	0.34391781494371	0.862280468618376
FBgn0003733	160.501545060567	-0.870945453159196	0.574690332175185	-1.51550392341332	0.129644837500407	0.862280468618376
FBgn0003741	257.159468418226	0.286022762557839	0.161421435461651	1.77190074998305	0.0764110339138515	0.862280468618376
FBgn0003742	834.220320853566	-0.0128896256876929	0.175487904782465	-0.0734502227015071	0.941447853552209	0.992571870136273
FBgn0003744	992.105620327876	-0.379195933310581	0.275142310618868	-1.37818110365384	0.168147379923324	0.862280468618376
FBgn0003747	10.0231162002437	0.43429464957771	0.567397603629253	0.76541502255178	0.444024450277213	0.868898993853825
FBgn0003748	7176.17573578731	-0.239885883633045	0.202488663468711	-1.18468796980386	0.236140840721498	0.862280468618376
FBgn0003751	9.35047515690202	0.455354235904011	0.786359029158398	0.579066582844932	0.562544247213152	0.889825455846315
FBgn0003861	10208.0819830412	0.197019348104576	0.235837100456849	0.835404386005941	0.403490061156421	0.863203104675502
FBgn0003862	2074.18988258278	-0.474594624961546	0.420144438849459	-1.12959873100117	0.258645345976144	0.862280468618376
FBgn0003863	34421.8993873262	-0.168316328156092	0.220994229168738	-0.761632232611719	0.446279531633628	0.868898993853825
FBgn0003865	0	NA	NA	NA	NA	NA
FBgn0003866	421.018794035802	-0.0621077198745879	0.16410555187941	-0.378462027416516	0.705087397354544	0.931973368736743
FBgn0003867	455.017428966976	-0.174210878961604	0.254194801625896	-0.685343987553272	0.493126880512509	0.878396178577716
FBgn0003870	1743.26288663712	-0.426225947726531	0.309765201808251	-1.37596458620414	0.168832597588736	0.862280468618376
FBgn0003882	502.531113684769	-0.395605958956804	0.29144378339219	-1.357400574314	0.174653965861639	0.862280468618376
FBgn0003884	38084.7395697835	0.334414542197516	0.260531962744435	1.28358355218609	0.199287707799347	0.862280468618376
FBgn0003885	6811.36535808381	0.438724305187636	0.324646633440386	1.35139028099054	0.176570445476752	0.862280468618376
FBgn0003886	376.044624758262	0.616190338834228	0.443183770247805	1.39037207632781	0.164415921276772	0.862280468618376
FBgn0003887	9377.39225800697	0.0477438553216921	0.188658464512274	0.253070305883815	0.800213884599787	0.953019132585363
FBgn0003888	1801.32896260428	-0.129084203637555	0.26016901410121	-0.496155178523062	0.619784931329506	0.90507352214699
FBgn0003889	26015.3524316587	0.336696743588033	0.204060542309048	1.64998455741683	0.0989460945767411	0.862280468618376
FBgn0003890	1988.70781747382	-0.0304411912133149	0.151755346707575	-0.200593862909975	0.841016157225714	0.965622095153749
FBgn0003891	5613.24669362861	-0.378000065528485	0.41024091677927	-0.921409957095693	0.35683643219431	0.862280468618376
FBgn0003892	343.786561787645	-0.288971896355428	0.399451875225848	-0.723421053392339	0.469421240471385	0.873720776466731
FBgn0003896	165.517585900264	-0.255802013174147	0.28009019756022	-0.913284418385078	0.361092975110605	0.862280468618376
FBgn0003900	301.069583648467	0.363462047118116	0.320237140504137	1.1349778059657	0.256384617613615	0.862280468618376
FBgn0003916	0.171188473919673	-0.117828150054015	3.81693625648277	-0.0308698238944633	0.975373355492518	0.999335904544736
FBgn0003920	2.80666722251143	-0.0962430984838447	1.78458586724385	-0.0539302144269943	0.956990764055706	0.997232234149335
FBgn0003922	2.8973540408864	0.555802771896466	1.50044234352615	0.370425944252073	0.711065145785324	0.934576015246889
FBgn0003923	0.325611606667221	0	3.81693625647327	0	1	1
FBgn0003926	0.0935074254611484	0	3.81693625648277	0	1	1
FBgn0003930	74.5775912897106	-0.398648464929266	0.870845323360945	-0.457771838735632	0.647116369966126	0.913612539539699
FBgn0003931	7.69309960303861	-0.738414836024106	1.25206668081009	-0.589756797574352	0.555353710530259	0.888034947207624
FBgn0003933	1.86983302890729	-1.99519605514865	2.13450292803171	-0.934735684334936	0.349924532036897	0.862280468618376
FBgn0003934	22.9753053613582	-0.695557369808635	0.356596795629501	-1.95054296150016	0.0511114380317974	0.862280468618376
FBgn0003935	2.62266973992022	-0.495640146462476	1.71114752425276	-0.289653661906747	0.772081209637453	0.947820762446549
FBgn0003936	1.06099006397931	-1.0120133344773	2.29313535262695	-0.441322983101701	0.658979189775697	0.91956758068858
FBgn0003938	66.1810133760798	-1.71031880430573	0.770751593459517	-2.21902727002998	0.0264848693455521	0.862280468618376
FBgn0003941	14378.7211262287	0.261955491582509	0.292137120804888	0.8966867711326	0.369886081589915	0.862280468618376
FBgn0003942	21842.9458679755	0.0557004209227826	0.238990184125406	0.233065726639028	0.815710368261075	0.959016216902099
FBgn0003943	11883.1871753132	0.231894730972845	0.251766525159787	0.921070546712552	0.357013596359688	0.862280468618376
FBgn0003944	454.237540662643	-0.391242220962125	0.332516595028378	-1.17660960930006	0.239351360601373	0.862280468618376
FBgn0003950	152.302492964114	0.155348048512573	0.295063180038503	0.526490795945132	0.598547245332741	0.900329748668171
FBgn0003961	1902.90068863851	0.517464026199398	0.414957821464756	1.2470280096729	0.212387227472407	0.862280468618376
FBgn0003963	275.406599607133	-0.147171771500571	0.279355545666588	-0.526826024338968	0.598314408906051	0.900145367052244
FBgn0003964	807.341318659517	-0.246783823353665	0.286689466064188	-0.860805340153	0.389345263365729	0.862280468618376
FBgn0003965	650.653177443489	-0.311619112093269	0.189052523776582	-1.64832029675274	0.0992869618727071	0.862280468618376
FBgn0003969	614.734285228916	-0.147122911702612	0.20891679884026	-0.704217719778025	0.48129719754809	0.87636988870685
FBgn0003975	112.761358227158	-0.386809443644435	0.279878383090973	-1.38206259223209	0.166952483159004	0.862280468618376
FBgn0003977	482.944081848769	-0.0709714721033588	0.341726318882629	-0.207685121635993	0.835474835596919	0.964174743488626
FBgn0003978	165.451279534061	-0.100289318982569	0.187665692207441	-0.534404119383265	0.593061969562005	0.899286389209548
FBgn0003979	8.30893043568809	-0.99862259849989	1.34846104103154	-0.740564664542305	0.458957439579219	0.871330352614604
FBgn0003980	10.1240872474654	0.415148698574766	0.712929549528394	0.58231377679518	0.560355347426295	0.889825455846315
FBgn0003983	4.91006226200532	0.205367133044622	1.56094933804375	0.131565533896184	0.895327948457937	0.976553539702594
FBgn0003984	279.029065172165	-0.211065714171509	0.186024410935922	-1.13461299573319	0.256537505617945	0.862280468618376
FBgn0003996	247.461225653257	-0.228658759872538	0.5755562209264	-0.39728310034508	0.691158708104553	0.929200127588175
FBgn0003997	304.515202379583	-0.603584034755562	0.402606437709964	-1.49919121559199	0.133824033272585	0.862280468618376
FBgn0004003	923.057747507034	0.227768365175693	0.319420437859218	0.713067600502382	0.475803927066191	0.874543640863165
FBgn0004009	50.2186423477422	-0.270605084737599	0.31408425556029	-0.861568448424361	0.388925039689892	0.862280468618376
FBgn0004028	13283.8192715211	-0.243552118730781	0.181286302650102	-1.34346674387672	0.179120887519271	0.862280468618376
FBgn0004034	104.127724591763	-3.1719648996228	2.07608653751909	-1.52785774691901	0.12654786091251	0.862280468618376
FBgn0004045	4116.6971924314	-7.05920558806849	2.24388840878009	-3.14596998694169	0.00165536991867093	0.862280468618376
FBgn0004047	2788.88216481711	-4.39459324752307	1.58882225817658	-2.76594390902261	0.00567582965217284	0.862280468618376
FBgn0004049	916.199906216887	-0.234357520263356	0.27831662039501	-0.842053629175063	0.399757935449166	0.862484911782841
FBgn0004050	692.39972995115	-0.00253380240467433	0.131637322010764	-0.019248358793467	0.984642979997989	1
FBgn0004052	8.4991294511894	-0.0675844184492499	0.709251622314267	-0.0952897622267312	0.924084674210882	0.987722869894952
FBgn0004053	1.84427658598551	0.504892342793056	1.38003511911756	0.365854706013496	0.714473495988215	0.936266776013432
FBgn0004054	1.07931402189718	-1.5508465349405	3.22592129356671	-0.480745310815013	0.630697523390206	0.908805831277673
FBgn0004055	1059.62844477313	-0.476448260543638	0.339798638999946	-1.40214881950635	0.160870811291713	0.862280468618376
FBgn0004057	2297.36954731092	0.0913621281963129	0.179973664228405	0.507641651838378	0.611704674686686	0.902338086698664
FBgn0004066	1991.59760360363	-0.19930221125479	0.174660902463107	-1.14108085120474	0.253836279070445	0.862280468618376
FBgn0004087	189.821170819128	-0.174290178301177	0.207550316370674	-0.839749036999316	0.401049113200104	0.862502688959859
FBgn0004101	296.173857369733	-0.461328526982684	0.286636772077567	-1.6094533985955	0.10751723710853	0.862280468618376
FBgn0004102	282.587167443774	-0.0111334605727034	0.205996329381897	-0.0540468881465508	0.956897807468282	0.997232234149335
FBgn0004103	3392.07002686799	-0.313187994202731	0.229895347806479	-1.36230679389983	0.173101084448424	0.862280468618376
FBgn0004106	309.475271393728	-0.161750660039282	0.35895514479884	-0.450615243667639	0.652266878147592	0.915753532793972
FBgn0004107	140.657727403741	-0.52309075042675	0.590224732422466	-0.886256914853132	0.375479100421744	0.862280468618376
FBgn0004108	319.653304121688	-0.307101232966312	0.321852722676403	-0.954166956900589	0.339999137718545	0.862280468618376
FBgn0004110	4.05250511517569	0.242406111262145	0.838183700470057	0.289204038597032	0.772425241491701	0.947820762446549
FBgn0004117	12167.6439054536	-0.283557522349933	0.157353306290591	-1.80204362421387	0.0715385423217664	0.862280468618376
FBgn0004118	369.195078712187	0.0390806720863138	0.22374509477452	0.174666050782912	0.861342045190643	0.970151593571103
FBgn0004132	374.838648714946	0.220423938771403	0.22266566083481	0.989932340465062	0.322207190804218	0.862280468618376
FBgn0004133	706.823938793469	0.102536059667162	0.257773489039005	0.397775814919614	0.690795446279988	0.929200127588175
FBgn0004143	0	NA	NA	NA	NA	NA
FBgn0004167	8186.83389712271	-0.343820698413839	0.498948615151306	-0.689090395229528	0.490766383884464	0.878396178577716
FBgn0004168	220.532782858426	-0.224486762618264	0.237917547401736	-0.943548574158787	0.345400382108048	0.862280468618376
FBgn0004169	24234.356918425	-0.256325843136706	0.153832097070978	-1.66627022589724	0.0956596041934429	0.862280468618376
FBgn0004170	0.539439547939159	0.782619508943614	2.41248357004079	0.324404078296119	0.745632132526886	0.946708529231698
FBgn0004171	8476.95922602203	0.481928684715942	0.355195601280287	1.35679800926265	0.174845400233615	0.862280468618376
FBgn0004172	17957.7007719011	0.709138346739781	0.469088214730191	1.51173771685494	0.130600599543085	0.862280468618376
FBgn0004173	14687.9249629686	0.798880397178303	0.432342808249599	1.84779388470155	0.0646321659208146	0.862280468618376
FBgn0004174	10507.3332438524	0.635850330084939	0.475315293661583	1.33774431112173	0.180979800999658	0.862280468618376
FBgn0004175	6932.72157325238	0.367730947164037	0.417861199501066	0.880031330028043	0.378842337435728	0.862280468618376
FBgn0004177	4363.47490137814	-0.279658888747745	0.25508540391365	-1.09633434315361	0.2729324853032	0.862280468618376
FBgn0004179	2979.58112199524	-0.353065430422859	0.306498688916259	-1.15193129103179	0.249349308712969	0.862280468618376
FBgn0004181	67440.0867094408	-0.256023752999724	0.167516122600867	-1.5283529073183	0.126424940454337	0.862280468618376
FBgn0004183	3.13207861817146	-2.10937936764975	1.27595232150466	-1.65318039874898	0.098294154466963	0.862280468618376
FBgn0004185	3.20817154675008	0.690524506557468	1.70351395280085	0.405353008950784	0.685218046921631	0.92717661971794
FBgn0004186	3.03143963156613	2.84504807536744	1.31095250638294	2.17021445209883	0.0299906037544066	0.862280468618376
FBgn0004187	69.0919423431332	-1.09816365263662	1.25183462617804	-0.877243391157349	0.380354452438042	0.862280468618376
FBgn0004188	1.90199546076607	-0.183257856626252	1.5236437951808	-0.120276049563478	0.904264476044351	0.980335327325686
FBgn0004189	1.95383675861596	-3.18024262988107	1.61002793129175	-1.97527171303761	0.0482373215211213	0.862280468618376
FBgn0004190	1.36789617674193	0.860352574863853	1.3791053437252	0.62384833673394	0.532727191891905	0.884594003316209
FBgn0004191	34.4111551966583	1.29237145977791	1.20137473316284	1.07574383254715	0.282041838295239	0.862280468618376
FBgn0004192	1.8393088208471	-4.09358136473191	1.7784536671326	-2.30176441499991	0.0213484613495794	0.862280468618376
FBgn0004197	131.967695990227	-0.249866414966675	0.686516600881131	-0.363962669869857	0.715885885439843	0.936777213174396
FBgn0004198	1671.90774171749	-0.142356722559296	0.469144384285459	-0.303439042068288	0.761555296043527	0.947820762446549
FBgn0004227	1865.73677151346	-0.100814819136839	0.204684113442138	-0.492538563161807	0.622338667435685	0.905788140417906
FBgn0004228	879.420164244479	-0.773188747331624	0.389538673368398	-1.98488314560849	0.0471574739868738	0.862280468618376
FBgn0004237	3760.10365973136	0.117937817793553	0.152875898470846	0.77146115884345	0.440433636295845	0.868526619980503
FBgn0004240	744.418210993627	1.46097983048796	0.705436545705044	2.07102940637671	NA	NA
FBgn0004242	4562.09609309146	-0.515765392829137	0.350890322633641	-1.46987636751567	0.141595241168921	0.862280468618376
FBgn0004244	1645.36485772373	-0.620978109530321	0.3565876975007	-1.74144569171263	0.0816054849578931	0.862280468618376
FBgn0004359	446.992243264679	-0.358123344034007	0.278644218206469	-1.28523515161777	0.198710123456772	0.862280468618376
FBgn0004360	110.532375407186	-0.0193348948180504	0.208162285520823	-0.0928837554299251	0.925995911240078	0.987954864004704
FBgn0004362	1541.44457684384	-0.615889839339507	0.536999968158943	-1.14690852115137	0.251419430573239	0.862280468618376
FBgn0004363	16929.9431899047	0.0132046283199224	0.113442249184729	0.11639956378527	0.907335881093704	0.981444556459959
FBgn0004364	732.463206291363	-0.694697020492033	0.47121093096626	-1.47428035904748	0.140406121175001	0.862280468618376
FBgn0004367	140.32220051561	-0.379632326191573	0.403874604928805	-0.939975728997606	0.347230010450068	0.862280468618376
FBgn0004368	992.041354517476	-0.194465847315273	0.343126998938423	-0.566745980109164	0.570886776773881	0.89137639634554
FBgn0004369	1430.81606381187	-0.422471694050114	0.297543558932578	-1.41986502939505	0.15564697857608	0.862280468618376
FBgn0004370	1611.05918249398	-0.246762610196323	0.349447603920973	-0.706150528512792	0.48009453186872	0.876157764206155
FBgn0004372	197.35116465528	0.388131962091181	0.246753629876088	1.57295340411441	0.11572960792429	0.862280468618376
FBgn0004373	3184.54300482837	-0.295338134429709	0.331541121982221	-0.890803930034195	0.373034366421296	0.862280468618376
FBgn0004374	1018.74341811951	0.190178504924605	0.24226976835729	0.784986530569249	0.432461465920693	0.865736188882361
FBgn0004378	180.004539698727	-0.161373047135969	0.391092686645297	-0.412620978725503	0.679884328549066	0.925867499295176
FBgn0004379	768.006933372627	0.069586393400992	0.231308900673174	0.300837508623646	0.76353840477523	0.947820762446549
FBgn0004380	641.239817206716	-0.126062478356803	0.202353100342633	-0.62298268790223	0.533295898399957	0.884594003316209
FBgn0004381	431.368467552351	-0.265249276018099	0.249767356231385	-1.06198536117895	0.288242330902742	0.862280468618376
FBgn0004387	1490.53861026926	-0.256227529129381	0.252227399156416	-1.01585922063322	0.309696430343565	0.862280468618376
FBgn0004389	0.466386820930313	-2.25541530260277	2.80955704904258	-0.802765440684452	0.422110320657944	0.865018364870926
FBgn0004390	647.495356652958	-0.36668672663355	0.414794325096676	-0.884020596347567	0.376685094614982	0.862280468618376
FBgn0004391	526.59480909316	-0.090538306955231	0.315430038526396	-0.287031341016859	0.774088322789786	0.947820762446549
FBgn0004394	70.0515177776866	-0.0753226268969305	0.22849323997908	-0.329649257473992	0.741664998978541	0.944713067379163
FBgn0004395	693.395498997843	-0.604107459013374	0.463001232027034	-1.30476425811779	0.191973133161033	0.862280468618376
FBgn0004396	1019.56416596836	-0.558798812144952	0.307158469288711	-1.81925249672902	0.0688729170421392	0.862280468618376
FBgn0004397	1415.92842577161	-0.122768923762051	0.201739635823485	-0.608551330336838	0.542821872685427	0.885297275953961
FBgn0004400	37.6517955845959	-1.46146219548423	0.760466077141442	-1.92179801231608	0.0546311785455249	0.862280468618376
FBgn0004401	4149.26348216754	-0.0999414124583637	0.189947521137766	-0.526152759771358	0.598782073548425	0.900465733716805
FBgn0004403	9313.07508354447	0.098989407110601	0.24905890851193	0.397453789956922	0.691032856360779	0.929200127588175
FBgn0004404	3147.91333039727	0.281107912573323	0.344892555830412	0.815059379569638	0.415038321584839	0.863658987555832
FBgn0004406	247.412037166446	0.0985404122232327	0.247962796141152	0.397399988049574	0.691072524308535	0.929200127588175
FBgn0004407	0	NA	NA	NA	NA	NA
FBgn0004414	8373.96229827493	0.555605830871641	0.540092546408581	1.02872338188375	0.303609679274167	0.862280468618376
FBgn0004419	3660.84354385839	-0.647596959649766	0.561237986495961	-1.15387228810541	0.24855253197914	0.862280468618376
FBgn0004425	437.849460291336	-0.190321834276433	0.511671899191217	-0.371960693126335	0.709922115260156	0.933821239929673
FBgn0004426	3660.25531868547	-0.773847169738627	0.41454997173502	-1.86671625256622	0.0619412228905105	0.862280468618376
FBgn0004427	10344.1351309792	-0.104834844770202	0.423634973823907	-0.247465037704321	0.804548346044498	0.95454281333528
FBgn0004428	1300.65961132476	0.266003907830443	0.550583300468502	0.483131085893987	0.629002663114865	0.908202194980582
FBgn0004429	533.910692093346	0.152556202904028	0.233920224292558	0.652171924703825	0.51429026925782	0.880871907382998
FBgn0004430	7.6976432988899	-0.442478157479452	0.860732318025649	-0.514071736604952	0.607201836913302	0.901676720310392
FBgn0004431	146.033381253323	-0.0654957337408829	0.533942431485514	-0.122664410765526	0.902372847075751	0.97939004566956
FBgn0004432	12861.9566988203	-0.0708704460534425	0.148600958643286	-0.476917825433186	0.633420638186661	0.909063694732593
FBgn0004435	1611.52023936505	-0.0439656759594129	0.191672021237799	-0.229379727283549	0.818573791429594	0.960019492453868
FBgn0004436	2591.31665524088	-0.184275467830219	0.157098770862795	-1.17299114956895	0.240799354869726	0.862280468618376
FBgn0004449	2716.9347527636	-0.467739434245451	0.446570572248903	-1.04740317278396	0.294913669009941	0.862280468618376
FBgn0004456	1023.73218780199	-0.392517549197505	0.388595083564224	-1.01009396618533	0.312450272773122	0.862280468618376
FBgn0004462	597.130717610973	-0.33276817149362	0.313906307533995	-1.06008755959	0.289104766880876	0.862280468618376
FBgn0004463	306.828188777348	0.0347954703378701	0.169270666954136	0.205561134507127	0.837133739280131	0.964174743488626
FBgn0004465	846.726159467585	-0.0779027614472926	0.128611420070121	-0.605721960031377	0.544699399081623	0.885297275953961
FBgn0004507	11945.8201049464	-0.255050645385962	0.188744365324451	-1.35130203726893	0.176598699700986	0.862280468618376
FBgn0004509	1884.35507202203	-0.420876475056526	0.384455166825608	-1.09473486474806	0.273632809588874	0.862280468618376
FBgn0004510	248.540865203131	-0.20452212008285	0.291281157610856	-0.702146756626416	0.48258764589876	0.876567982465001
FBgn0004511	1.86363652077333	0.129381477198001	1.33431326397017	0.0969648437826624	0.922754313446946	0.987494896318122
FBgn0004512	1879.38613017962	0.0151685244479352	0.23605010115399	0.0642597667773922	0.948763388672082	0.995527833059428
FBgn0004513	568.701634295622	-0.173327532009016	0.204412046475711	-0.847932081290579	0.39647579674298	0.862280468618376
FBgn0004514	117.660705262441	-0.172531132286473	0.230408267540084	-0.748806169711156	0.453974040546892	0.871330352614604
FBgn0004516	3180.98531220096	-0.252223294793236	0.270268567098537	-0.933232071716567	0.35070015893014	0.862280468618376
FBgn0004552	265.827508889975	0.351036712600155	0.321328741994215	1.09245351169512	0.274633813369138	0.862280468618376
FBgn0004554	15.6123262703249	-0.00792030361379496	0.422032178959641	-0.0187670609225093	0.985026930769033	1
FBgn0004556	211.082442414901	-0.292878342433903	0.293867725280417	-0.996633237469105	0.318942566555423	0.862280468618376
FBgn0004567	34.75048108205	-0.533011903447137	0.41257288693931	-1.29192179205306	0.196384230088633	0.862280468618376
FBgn0004569	286.862056959536	-0.44591614962593	0.234304224039384	-1.90315028017155	0.0570209387060536	0.862280468618376
FBgn0004573	144.600843863912	-0.339508315230985	0.248644724676846	-1.3654354246696	0.172116236235379	0.862280468618376
FBgn0004574	2410.69011188751	-0.0870099101500613	0.210198528502707	-0.413941575946574	0.678916894522031	0.925514734857405
FBgn0004575	2330.646578313	-0.343405562628096	0.307062385983765	-1.11835763122824	0.263414282085752	0.862280468618376
FBgn0004577	11.130607178405	-1.69872166180493	1.04144808854637	-1.63111506035405	0.10286604343931	0.862280468618376
FBgn0004580	2132.83680093264	-0.362308466167716	0.224612513146347	-1.61303776487133	0.106736303368892	0.862280468618376
FBgn0004581	651.749530347529	0.0955443329798821	0.173575603353988	0.550447938153096	0.582012176155952	0.894305198646305
FBgn0004583	701.740289679112	-0.432736472457758	0.46325200116269	-0.934127583629768	0.350238084881081	0.862280468618376
FBgn0004584	329.947573811447	-0.210282032101599	0.282439514044282	-0.74452058456888	0.456561592684102	0.871330352614604
FBgn0004587	4103.38335518384	0.039136117385983	0.150528107191841	0.259992091285023	0.794869874122427	0.95083675253883
FBgn0004588	0.171894533145567	0.60349384745755	3.81693625648277	0.158109490676603	0.874370522203322	0.970151593571103
FBgn0004589	49.0339338097454	0.79637122062583	0.51779479338047	1.53800546240848	0.124047279194192	0.862280468618376
FBgn0004590	1.38786530064418	-0.350622227383065	1.57228819213158	-0.223001246932804	0.823534536027898	0.961163109668586
FBgn0004591	0	NA	NA	NA	NA	NA
FBgn0004592	0.171894533145567	0.60349384745755	3.81693625648277	0.158109490676603	0.874370522203322	0.970151593571103
FBgn0004593	0.566406699644149	-0.835830976496258	2.40293261842052	-0.347837875306575	0.727961943337321	0.940807551908483
FBgn0004594	2.39137775895093	0.478948107355119	1.27807728486779	0.374741115444097	0.707853011080195	0.93292710442196
FBgn0004595	4173.87726794262	-0.423295894212795	0.45634958252991	-0.927569368785501	0.35363099299298	0.862280468618376
FBgn0004597	228.156850737185	0.0221743959971076	0.155131684276432	0.142939181641287	0.88633821380476	0.973282982201362
FBgn0004598	1471.29218694696	-0.347872592871113	0.372371811851828	-0.934207643540795	0.350196793684292	0.862280468618376
FBgn0004606	644.870049168942	-0.305662997929136	0.41664301594857	-0.733632837294139	0.46317254203823	0.871979853153491
FBgn0004607	572.404740862454	-0.643256851082661	0.413866490699094	-1.55426173787611	0.120121996312526	0.862280468618376
FBgn0004611	2340.86790484553	-0.198205256938138	0.300519548301804	-0.65954197674717	0.509547799929364	0.880871907382998
FBgn0004618	193.993129873712	0.0930098100914301	0.196776378755999	0.472667556336939	0.636450376687285	0.909143540896539
FBgn0004619	188.505387988317	-0.0497652278493424	0.154455081265573	-0.322198709434332	0.747302162124532	0.947025716580039
FBgn0004620	266.629891533933	-0.127156154385726	0.168019969870542	-0.756791912792859	0.449174538679981	0.869796236665884
FBgn0004622	130.840003186884	-0.3930315852371	0.177960981264098	-2.20852673684594	0.0272075761200749	0.862280468618376
FBgn0004623	4161.85164266358	0.15383577819797	0.152530329989266	1.00855861394121	0.313186363939177	0.862280468618376
FBgn0004629	7407.4767787001	0.21813082998987	0.33931296303745	0.642860290503534	0.520314757894146	0.881876796477609
FBgn0004635	205.100545929288	-0.757765929391759	0.378817874973496	-2.00034364652084	0.0454631690304725	0.862280468618376
FBgn0004636	1931.01088489224	-0.610198235905226	0.382735682095572	-1.59430715360596	0.11086725622583	0.862280468618376
FBgn0004638	1406.84201956855	-0.343426788956516	0.26342468758342	-1.30370009017382	0.192335858678464	0.862280468618376
FBgn0004643	418.511179871019	-0.199085713479033	0.2419932878623	-0.822691055763157	0.410683702925545	0.863505398638206
FBgn0004644	102.440561190155	-0.281632617192674	0.283585065846916	-0.993115121741649	0.32065385552004	0.862280468618376
FBgn0004646	1661.72228406109	-0.35430355578269	0.22312671048881	-1.58790292299164	0.112308292441151	0.862280468618376
FBgn0004647	569.889200184771	-0.415313353209249	0.471031945043104	-0.881709526455246	0.377933908007049	0.862280468618376
FBgn0004648	2826.67209430178	-0.455158015038457	0.336133739563751	-1.35409797192386	0.175705123156936	0.862280468618376
FBgn0004649	463.581281470559	-2.5765095711635	1.43495700479643	-1.79553085043759	0.0725691620309041	0.862280468618376
FBgn0004650	477.488680202662	-0.126678273125032	0.45273797429121	-0.279804832637146	0.779627243835627	0.9481230927056
FBgn0004652	1330.93063981129	-0.188346803291527	0.222672420410123	-0.845847020231003	0.397638090908086	0.862280468618376
FBgn0004654	3497.85989705808	-0.0156413097004594	0.198019763100567	-0.0789886294961161	0.937041667152167	0.990903705526348
FBgn0004655	1133.75663952223	-0.10911932803156	0.394060982578476	-0.276909749647264	0.781849406092973	0.948741009587333
FBgn0004656	4317.24295206206	-0.145384240866612	0.35608151612596	-0.408289209865036	0.683061360068667	0.92661460793159
FBgn0004657	2346.1707759749	-0.420961627264511	0.284047924720216	-1.48200916334507	0.138337856785795	0.862280468618376
FBgn0004666	80.4592054317819	-0.599178249270187	0.400147069523037	-1.49739507022853	0.134290490266201	0.862280468618376
FBgn0004687	2871.86424456961	-0.300427802045175	0.305738704346346	-0.982629277138709	0.325789929704206	0.862280468618376
FBgn0004698	1186.90859140247	-0.300276325272065	0.301990124184433	-0.994324983583496	0.320064676352457	0.862280468618376
FBgn0004777	56.9740841586948	0.226503843932928	0.756290471431859	0.299493187457586	0.764563769252694	0.947820762446549
FBgn0004778	3.95082637209249	0.364983834085974	1.13139051884761	0.322597571754209	0.747000032950272	0.947025716580039
FBgn0004779	0.749166873187587	-0.502027366869813	2.68692249565258	-0.186841030093756	0.851785275979064	0.968383406883098
FBgn0004780	14.3257455625714	-0.579281515304321	0.534674060009774	-1.08342924901524	0.278617938908911	0.862280468618376
FBgn0004781	3.1136196170751	-1.51426249422582	1.12151355048436	-1.35019545111321	0.176953296945951	0.862280468618376
FBgn0004782	6.60501937378987	-0.0484256953128795	1.45734342183438	-0.0332287466271508	0.973492174281981	0.999335904544736
FBgn0004783	1.90279793717435	2.76722704579258	2.27792973698504	1.21479912258187	0.224442715588332	0.862280468618376
FBgn0004784	3141.89585101804	0.101042761327254	0.126946359836004	0.795948473495315	0.426061985049633	0.865018364870926
FBgn0004795	1119.03103752357	-0.18988497836669	0.305400874355831	-0.621756498789359	0.534101994535409	0.884594003316209
FBgn0004797	848.93680032632	-0.576890097248073	0.342188176548303	-1.68588553545958	0.091817848469074	0.862280468618376
FBgn0004811	744.350008255828	0.125482398082331	0.174727809392262	0.718159281678078	0.472659081175019	0.874159905574421
FBgn0004828	6276.90149634669	-0.39672311887917	0.276346860903078	-1.43559842721829	0.151116642542303	0.862280468618376
FBgn0004832	416.135343061196	0.27763312421655	0.161694614224055	1.71702147006481	0.0859752491904111	0.862280468618376
FBgn0004837	314.181439169785	-0.15592925248382	0.266448737016378	-0.585212954018377	0.558404535684719	0.888942645715381
FBgn0004838	10273.6400211779	-0.655538436952487	0.465387914963978	-1.4085850016179	0.158957916336056	0.862280468618376
FBgn0004839	157.634929119319	-0.285562404737776	0.394762934121041	-0.723376943617047	0.469448332431568	0.873720776466731
FBgn0004841	68.0544187968919	-0.0336268185846685	0.271760005692856	-0.123737186783377	0.901523367108762	0.979013867910269
FBgn0004842	38.5615596131505	-0.0612250310669527	0.292169313059442	-0.209553256725824	0.834016365247944	0.964115391772175
FBgn0004852	1392.34411557163	-0.286459310392539	0.295027074832858	-0.970959396031118	0.331568498607393	0.862280468618376
FBgn0004854	86.5631563325505	-0.375041874238897	0.293019412708422	-1.27992159554321	0.200572711737058	0.862280468618376
FBgn0004855	365.974119880043	0.172608406536669	0.23580945052202	0.731982565391502	0.464179209260917	0.872738829151699
FBgn0004856	743.11601428822	-0.106037163644781	0.147996059012343	-0.716486400735426	0.473691061721918	0.874159905574421
FBgn0004858	596.544232126386	-0.199489439949124	0.228579222484836	-0.872736540882925	0.382806695769615	0.862280468618376
FBgn0004859	561.013329003174	-0.643365922443518	0.425158115458697	-1.51323919043483	0.130218912734864	0.862280468618376
FBgn0004860	303.07799582743	-0.283732484908737	0.248993191046275	-1.1395190515712	0.254486726666289	0.862280468618376
FBgn0004861	450.950622726411	-0.176435789605748	0.245136826471852	-0.719744120641162	0.471682555636525	0.873915538808634
FBgn0004862	45.296839257076	0.271201095639183	0.391929965102877	0.69196315614193	0.488960467037599	0.878396178577716
FBgn0004863	36.0502329009369	0.374257211076248	0.328549978728257	1.13911804993844	0.254653919989736	0.862280468618376
FBgn0004864	681.154434553606	-0.36884475843896	0.345782996684557	-1.06669431977721	0.286109892955775	0.862280468618376
FBgn0004865	274.25069087009	-0.0740286942076356	0.277048027532595	-0.267205274359609	0.789311115401641	0.949662655093802
FBgn0004867	21746.9578666042	0.46796854650674	0.381495330533468	1.22666913341338	0.219946973525441	0.862280468618376
FBgn0004868	4518.2976312843	-0.120666829631516	0.106807240545781	-1.12976263608078	0.258576256190375	0.862280468618376
FBgn0004870	138.786893195435	-0.134988618049378	0.346987798585746	-0.389029869636814	0.697254050645942	0.930759280292248
FBgn0004872	142.168209130768	-1.42367908068154	1.04129348234245	-1.36722173414443	0.171555814895334	0.862280468618376
FBgn0004875	3122.23687140757	-0.201718626143698	0.321794845542307	-0.626854745929042	0.530754453644198	0.884323471079562
FBgn0004876	3722.08416088845	-0.12932856113932	0.244985830127679	-0.527902209984628	0.597567210752716	0.89992502088346
FBgn0004878	1.81281039642369	0.496031523750125	1.62583188926344	0.305093981134079	0.760294575170695	0.947820762446549
FBgn0004880	908.874047654034	-0.520151569352708	0.38832936256167	-1.33945979753232	0.180421033784685	0.862280468618376
FBgn0004882	6982.91716105481	0.0682372680185912	0.179247641213424	0.380687118428205	0.703435428434331	0.931650092266097
FBgn0004885	1244.41789349884	-0.0723412383539108	0.265347975651684	-0.272627813256324	0.785139329666294	0.949066500804127
FBgn0004888	6435.49945825212	-0.064047596191418	0.139626533424014	-0.458706483795026	0.646444957336175	0.913488576781089
FBgn0004889	2411.61654376901	-0.464782888763606	0.326383197524887	-1.42404049071235	0.154434751276243	0.862280468618376
FBgn0004892	100.899898831679	-0.184100773147658	0.210572688824032	-0.874286091780423	0.381962471621099	0.862280468618376
FBgn0004893	959.113936763119	-0.0460824250462863	0.197594817700786	-0.233216769460362	0.815593084699327	0.959016216902099
FBgn0004895	6.47963201976983	0.596684175334815	0.696635458116984	0.856522831823205	0.391708649365932	0.862280468618376
FBgn0004896	34.5073253279369	0.120919406202966	0.321523849548659	0.376082229584857	0.706855764943462	0.932602656228729
FBgn0004897	5.96578005403526	-0.0763629333776342	0.819352209403721	-0.0931991547727771	0.925745345861688	0.987954864004704
FBgn0004898	11.2798261270639	-0.429548421853245	0.460107559472309	-0.933582622171844	0.350519232830713	0.862280468618376
FBgn0004901	231.323082435306	-0.401448422651133	0.376822209510993	-1.0653523399592	0.286716515686173	0.862280468618376
FBgn0004903	1853.9188134829	-0.139684393450955	0.252205818004504	-0.553850797559555	0.579680960365801	0.893966966489364
FBgn0004907	14702.6246612193	-0.377882767521623	0.281994796325485	-1.34003454122416	0.180234115487586	0.862280468618376
FBgn0004908	550.298257013171	0.266597557701609	0.254946244131747	1.04570105988242	0.295699073323509	0.862280468618376
FBgn0004910	1499.92275292729	-0.560390051157779	0.319653868082539	-1.75311518837331	0.0795822369551706	0.862280468618376
FBgn0004911	16.6279957180557	-0.322199156280065	0.715393520500875	-0.45038031104123	0.65243623927755	0.9159125539441
FBgn0004913	1307.55430158348	-0.128795486782986	0.237174675464984	-0.543040636739485	0.587101823672306	0.895262197043846
FBgn0004914	1817.23623890334	-0.559881355154427	0.370463667888879	-1.51129895772226	0.130712299397809	0.862280468618376
FBgn0004915	963.537967470054	-0.0268753340062166	0.18978685291361	-0.141607985978092	0.887389658608548	0.9735468887832
FBgn0004919	704.899938151908	-0.183277683997505	0.175094050349872	-1.04673850214373	0.295220200846075	0.862280468618376
FBgn0004921	8172.36641275318	-0.141834110808241	0.128053204775806	-1.10761859538434	0.268026569120547	0.862280468618376
FBgn0004924	2313.35206792958	-0.363747462674188	0.365996553602859	-0.993854884953066	0.320293521090365	0.862280468618376
FBgn0004926	2791.5646209681	0.117670593064015	0.173969716122818	0.67638549792737	0.49879592225653	0.880131052016592
FBgn0004956	190.913304560497	0.353553822926799	0.282548866367282	1.25130150926608	0.210824495046608	0.862280468618376
FBgn0004957	179.67973272304	0.232808030253233	0.228694790942349	1.01798571490822	0.308684744850917	0.862280468618376
FBgn0004959	15.1927540967688	-0.160327549512077	0.607119883379665	-0.264078897596928	0.79171912414918	0.95004556916597
FBgn0005198	860.887060670871	-0.169268354425631	0.290484536623859	-0.582710378985896	0.560088285057426	0.889825455846315
FBgn0005278	5286.04023058944	-0.486049769750389	0.372351994900628	-1.3053502503192	0.191773610479783	0.862280468618376
FBgn0005322	1097.46272604059	0.0149725722195872	0.145096925961377	0.1031901407999	0.91781206464166	0.985457544765757
FBgn0005355	370.444923069448	-0.0180478938763856	0.187827869979805	-0.0960874117260984	0.923451149031544	0.987572263979618
FBgn0005386	1372.39784481949	-0.194392955146352	0.437928570499039	-0.443891922659516	0.657120724664702	0.918805210195642
FBgn0005390	58.9560962256207	-2.33488287767891	1.74591427077516	-1.33734108069479	0.181111327269007	0.862280468618376
FBgn0005391	1995.38783460624	-6.77813632540524	1.96605327729174	-3.4475852733463	0.000565621824600142	0.862280468618376
FBgn0005411	1418.88778963201	0.0893697003595051	0.128919149693501	0.693222849917775	0.488169710591215	0.877941957763338
FBgn0005427	859.879782108805	-0.434973763176521	0.375777734068944	-1.15752936840243	0.247056147684236	0.862280468618376
FBgn0005533	16033.3094308749	0.486871453093969	0.376331068335956	1.29373175392294	0.195758093046556	0.862280468618376
FBgn0005536	4305.01641859512	-0.39355245930026	0.281282865106671	-1.39913413904901	0.161772761984341	0.862280468618376
FBgn0005558	180.083017269894	0.201515542551542	0.190849141796121	1.05588917327601	0.291018851080975	0.862280468618376
FBgn0005561	204.474624430537	-0.613288545886133	0.484380056735643	-1.26613087669058	0.205466229800263	0.862280468618376
FBgn0005564	540.871690109308	-0.227117699915801	0.15854840600267	-1.43248176151311	0.152005994094321	0.862280468618376
FBgn0005585	16701.697699257	0.264465724923769	0.27498393911517	0.961749714455157	0.336175343079103	0.862280468618376
FBgn0005586	1448.1034099617	-0.217791225492438	0.27285130807182	-0.798204806242346	0.424751648775481	0.865018364870926
FBgn0005590	1.12280830973806	0.240468807053945	2.57272646130009	0.0934684703839165	0.925531397002322	0.987954864004704
FBgn0005592	87.7550594835447	-0.676763495021661	0.376165198326094	-1.79911245918869	0.0720008931865186	0.862280468618376
FBgn0005593	19688.5512892767	0.298086984606161	0.302743410709299	0.984619232199875	0.324811139190323	0.862280468618376
FBgn0005596	489.298653364484	-0.198222777913611	0.352498859831185	-0.562335940628408	0.573887155399584	0.891459476529585
FBgn0005612	757.1535388746	-0.270722076718302	0.252957208033755	-1.07022875063587	0.284516356106185	0.862280468618376
FBgn0005613	103.616510951407	-0.0849966369329867	0.241183294949416	-0.352415107981725	0.724526973318653	0.939939331030269
FBgn0005614	8567.04670690293	0.296937135999144	0.274915085384345	1.08010491888436	0.280095461711189	0.862280468618376
FBgn0005616	556.093073942404	-0.179749381044073	0.238849967453604	-0.752561882090222	0.451713230629802	0.871330352614604
FBgn0005617	555.374127085621	-0.593230998674175	0.484966750119429	-1.22324055933337	0.221238850473402	0.862280468618376
FBgn0005619	472.751244256797	-0.00794010433367697	0.168506480165057	-0.0471204687552634	0.96241721374843	0.998545712342695
FBgn0005624	154.448672912756	-0.393940085186525	0.405510606614393	-0.971466784742153	0.331315885623008	0.862280468618376
FBgn0005626	1202.7247340579	-0.456156050630844	0.335363899382287	-1.3601823317031	0.173772232256712	0.862280468618376
FBgn0005630	5339.8140665501	-0.448442151507359	0.378887936129658	-1.18357463710299	0.236581485220413	0.862280468618376
FBgn0005631	717.370292374617	-0.267249857699498	0.334178875149784	-0.799720980506959	0.423872474388843	0.865018364870926
FBgn0005632	3896.76404824051	-0.352529054189449	0.394701890771743	-0.893152686702779	0.371775411360547	0.862280468618376
FBgn0005633	541.013221673975	-1.93564189311001	1.08953237289307	-1.77658043144715	0.0756372976324833	0.862280468618376
FBgn0005636	462.825401322086	0.192104816878504	0.221276573665057	0.868166085982919	0.385303417172542	0.862280468618376
FBgn0005638	83.3799895954531	-0.358074422303989	0.257304409811003	-1.39163733169985	0.164032248163574	0.862280468618376
FBgn0005640	1137.88674985381	-0.425496965595203	0.315907929004762	-1.34690182337522	0.17801185421815	0.862280468618376
FBgn0005642	541.162928936796	-0.182388733194306	0.210432445003448	-0.866732946962231	0.38608834889106	0.862280468618376
FBgn0005648	952.82953812606	-0.266550201751934	0.267194999960089	-0.99758678789554	0.31847977036315	0.862280468618376
FBgn0005649	2243.3295415322	-0.310059058282706	0.267898786162461	-1.15737388259265	0.247119639815875	0.862280468618376
FBgn0005654	0	NA	NA	NA	NA	NA
FBgn0005655	265.168364595212	-0.365380431847029	0.529804948083898	-0.689650848238526	0.490413782528779	0.878396178577716
FBgn0005658	148.041286443158	-0.281176092656615	0.235530057262063	-1.19380131744189	0.23255569621411	0.862280468618376
FBgn0005659	533.932030733425	-0.439825071414604	0.277895473426008	-1.58269966038764	0.113489935761853	0.862280468618376
FBgn0005660	193.34736449832	0.0949381169424753	0.275018528548603	0.345206257351119	0.729939314904419	0.941888420322913
FBgn0005664	274.28556195298	-0.115966124949907	0.229598980708837	-0.505081183687693	0.613501816667626	0.902338086698664
FBgn0005666	26801.1529818155	-0.812233201197097	0.410715353914996	-1.97760612904966	0.047973157305172	0.862280468618376
FBgn0005670	128.926551881333	-0.405841505646654	0.369166461413315	-1.09934554751516	0.271617372332835	0.862280468618376
FBgn0005671	13380.1849095647	-0.20418072769775	0.162459752519505	-1.25680806803664	0.208823143851708	0.862280468618376
FBgn0005672	1166.80812913489	-0.0852695079157877	0.151796171725059	-0.561736880098874	0.574295302976782	0.891612979652457
FBgn0005674	1516.66602971579	-0.212243796150406	0.269603865237668	-0.787243150105818	0.431139541977161	0.865568583065813
FBgn0005677	355.798664967151	-0.0942394137796502	0.277288303144943	-0.339860761203438	0.733961387572224	0.94354314395984
FBgn0005683	165.602617809272	-0.268620999861342	0.316430169534024	-0.848910836336858	0.395930908587981	0.862280468618376
FBgn0005694	909.065926740983	-0.442515764985782	0.339967649338183	-1.30164080566851	0.193039203658173	0.862280468618376
FBgn0005695	395.626632949607	-0.433322616043551	0.42694862064929	-1.01492918605655	0.310139584511795	0.862280468618376
FBgn0005696	62.7728009662822	-1.42062137228194	0.818265005502294	-1.73613849147794	0.0825393498433621	0.862280468618376
FBgn0005771	836.243963714937	-0.381562776853707	0.31111395604077	-1.22644056766038	0.220032927689319	0.862280468618376
FBgn0005775	409.599659028285	-0.230870719035847	0.193856187053592	-1.19093809975754	0.233677886162576	0.862280468618376
FBgn0005777	1532.72092405952	-0.0938078317277693	0.239429880951641	-0.391796676985009	0.695208450556735	0.929906085089733
FBgn0005778	662.895719247231	0.316712738859934	0.214403699931529	1.47717944681495	0.139627541686964	0.862280468618376
FBgn0005779	469.859434183453	0.292437221134637	0.201919794621266	1.44828406587453	0.147537622100374	0.862280468618376
FBgn0008635	2146.53564373413	0.0577161633821204	0.185646654677253	0.310892558136639	0.755882302086461	0.947820762446549
FBgn0008636	38.8623376255329	-0.136798981009032	0.418442860204202	-0.326923922043439	0.743725427215146	0.945305343866893
FBgn0008646	52.2611565930856	0.241658833964122	0.320260259343087	0.754570156346621	0.450506935873745	0.871065951682303
FBgn0008651	108.420628163693	-0.136680853131823	0.204803481627334	-0.667375632707901	0.504532226582578	0.880871907382998
FBgn0010014	500.29032493427	0.0833325547729298	0.198980662716877	0.418797252130481	0.675364313248321	0.923950440445629
FBgn0010015	428.694544563985	-0.226362227655969	0.148699861925947	-1.52227597742288	0.127939944685135	0.862280468618376
FBgn0010019	349738.380495629	-0.495012078903415	0.354885131517933	-1.3948515588301	0.163060607330206	0.862280468618376
FBgn0010038	103.585756961425	0.33014944663038	0.465750219380914	0.708855160753809	0.478414363000198	0.874917310219372
FBgn0010039	726.622541232757	-0.000722331620667266	0.137667992396366	-0.00524691039720815	0.995813590410851	1
FBgn0010040	9.07786566374647	1.00266160080811	0.75667433190046	1.32509001367845	0.185141297930968	0.862280468618376
FBgn0010041	343.47714004146	-0.455798603095369	0.287551463019025	-1.58510270930255	0.112943000130353	0.862280468618376
FBgn0010042	15.4333901657937	-0.792301060894615	0.553766900834423	-1.43074831612501	0.152502360427895	0.862280468618376
FBgn0010043	63.759541696776	0.44297464077329	0.399068204659707	1.11002238615082	0.266989380047538	0.862280468618376
FBgn0010044	113.229812545212	0.358477350468841	0.479057440685347	0.748297218713476	0.454280901757704	0.871330352614604
FBgn0010051	1952.73146087918	-0.358445955071666	0.43197757836382	-0.829779074250414	0.406663704088702	0.863505398638206
FBgn0010052	139.855020597069	-0.0642057533167653	0.301125138154204	-0.213219506383044	0.831155754189	0.96394780209328
FBgn0010053	2252.53605014899	-0.146633198924118	0.156262013207352	-0.938380326186777	0.348048992757031	0.862280468618376
FBgn0010078	20832.2830059342	0.176136869862616	0.210541819885884	0.836588521739216	0.402823899716944	0.86279814546527
FBgn0010097	31.6728300903634	-2.72882126254369	1.59888512501366	-1.70670251405358	0.0878773597024688	0.862280468618376
FBgn0010100	19582.4714205272	-0.240862731522471	0.188666582061137	-1.2766581600785	0.201722958949797	0.862280468618376
FBgn0010105	263.603234265884	0.0431828397102273	0.134612706164065	0.320793192119594	0.748367118866994	0.94713873078807
FBgn0010109	2.77423520725497	-0.382670944913436	1.33594621688612	-0.286441879228777	0.774539702804436	0.947820762446549
FBgn0010113	1489.12863275257	-0.344603113876872	0.390393122970455	-0.882707951551062	0.377394084826833	0.862280468618376
FBgn0010114	1880.5778335236	-0.0403011133210876	0.228088511148858	-0.176690676431246	0.859751364778979	0.970151593571103
FBgn0010173	1241.46955581763	-0.181879308557259	0.26944026418087	-0.675026463139032	0.499658952151967	0.880374594878312
FBgn0010194	188.721382302152	-0.217967916377535	0.368510544114526	-0.59148352702167	0.554196489340951	0.888031974455975
FBgn0010197	44.3449500605273	-0.237137437660995	0.390760995429707	-0.606860562938794	0.543943452029893	0.885297275953961
FBgn0010198	15312.4345297999	0.0414943347710018	0.150925804781266	0.274932009348161	0.783368474506006	0.948857848022038
FBgn0010213	3160.30480874892	0.176653932810547	0.281411620941643	0.627742138790992	0.530172875844333	0.884323471079562
FBgn0010215	1760.9847818584	-0.401592903139052	0.353505182959777	-1.13603116021285	0.255943523475499	0.862280468618376
FBgn0010217	34385.2470730708	-0.262068602485208	0.204292778811462	-1.28280893730007	0.199559022213136	0.862280468618376
FBgn0010220	357.03714193114	-0.117776818854015	0.132563528958699	-0.888455669362192	0.374295691633187	0.862280468618376
FBgn0010222	463.477821873207	0.293651134698642	0.238919073107535	1.22908201040305	0.219041059282822	0.862280468618376
FBgn0010223	291.556393746409	-0.330171185753531	0.285051586184628	-1.15828573407649	0.246747451163127	0.862280468618376
FBgn0010225	6408.64785416215	-0.318272180308446	0.2356932481265	-1.35036613411015	0.176898568284044	0.862280468618376
FBgn0010226	9227.47647192483	0.124370604247606	0.110798002354552	1.12249861554021	0.261650495872279	0.862280468618376
FBgn0010228	2408.35470071603	-0.338260768833789	0.223375939928336	-1.514311563467	0.129946837120355	0.862280468618376
FBgn0010235	1497.73866468137	-0.168935748988268	0.196869569228934	-0.858110014919663	0.390831717779054	0.862280468618376
FBgn0010238	1102.97893997258	-0.338588937065846	0.220010099072888	-1.53896997679944	0.12381162599683	0.862280468618376
FBgn0010240	208.401546690711	-0.0167670546462818	0.20286596347349	-0.0826509009160275	0.934129126617176	0.989758303593208
FBgn0010241	902.366497393294	-0.340073644886308	0.36269112209042	-0.937639837794339	0.348429531177536	0.862280468618376
FBgn0010246	3465.28421556007	-0.38875183110955	0.327303397390303	-1.18774150897668	0.234935264790295	0.862280468618376
FBgn0010247	1105.15109572203	-0.52035452416665	0.452202133997872	-1.15071222589387	0.249850645114227	0.862280468618376
FBgn0010258	578.784912543408	0.348433980199829	0.232512557096921	1.49855983930617	0.133987857941178	0.862280468618376
FBgn0010263	7223.83704783774	-0.401650158581214	0.198887295966701	-2.01948624535808	0.0434367055009743	0.862280468618376
FBgn0010265	18340.9009301863	0.277075763812723	0.29111201516029	0.951784019152086	0.34120652838836	0.862280468618376
FBgn0010269	490.740651507614	-0.0389163190015282	0.127296811825075	-0.305713225991906	0.759823002264217	0.947820762446549
FBgn0010278	666.959768723781	-0.0862736480102803	0.17447702131143	-0.494469972961584	0.620974307371933	0.905788140417906
FBgn0010280	2169.08773228464	-0.210316042411696	0.268782166651733	-0.782477665953961	0.433933905866026	0.865769530484962
FBgn0010282	1017.56953562895	0.0837068006794131	0.133974102805377	0.62479836719648	0.532103402467571	0.884557653211185
FBgn0010287	261.355692474001	0.156595547398638	0.151406700996661	1.03427091646421	0.301009529225592	0.862280468618376
FBgn0010288	4292.64456033049	0.26315042541375	0.200693691199292	1.31120427274636	0.189788759206066	0.862280468618376
FBgn0010292	381.694096935402	-0.10812059522868	0.174401062188215	-0.619953765602618	0.535288226618343	0.884594003316209
FBgn0010294	0	NA	NA	NA	NA	NA
FBgn0010295	0	NA	NA	NA	NA	NA
FBgn0010296	0	NA	NA	NA	NA	NA
FBgn0010300	820.279561067444	-0.644198160112948	0.494310011187357	-1.30322701449148	0.192497269922393	0.862280468618376
FBgn0010303	1015.15401134219	-0.289406821355939	0.322361107480692	-0.897772140124792	0.369307040418473	0.862280468618376
FBgn0010309	534.408359675985	0.0956718460934998	0.210703341589512	0.454059462805701	0.649786028932199	0.914815182209222
FBgn0010313	1528.06859054706	-0.255659008848088	0.311633517774442	-0.820383541134787	0.411997495219145	0.863505398638206
FBgn0010314	179.180059431394	0.166094406519887	0.264266793994709	0.6285103172032	0.529669690103982	0.884272423496529
FBgn0010315	324.837653081842	-0.571571687421183	0.46747908665735	-1.22266793046965	0.221455144325848	0.862280468618376
FBgn0010316	421.224362646703	-0.0959987908495135	0.238780110834983	-0.402038471771448	0.687655713200708	0.928454029210634
FBgn0010317	49.5540508983485	-0.369183117923174	0.610790775238227	-0.604434665502572	0.545554694349462	0.885297275953961
FBgn0010323	13.9108671144984	1.08461664907541	0.628096665850109	1.72683076992204	0.0841980606481611	0.862280468618376
FBgn0010328	1572.9444003362	-0.248206806716011	0.308775115971835	-0.803843295256508	0.42148748199739	0.865018364870926
FBgn0010329	264.834809732562	-0.124702817901356	0.213629410930944	-0.583734315223416	0.559399076444847	0.889460329164618
FBgn0010333	1336.03275835242	-0.322371052712797	0.25940324334099	-1.2427410257513	0.213963280714957	0.862280468618376
FBgn0010339	1071.6776826524	0.216156015887225	0.172811745090655	1.25081785253561	0.211000939993271	0.862280468618376
FBgn0010340	309.318008891924	-0.0298292738654529	0.173152496024595	-0.172271694317453	0.863223936311079	0.970151593571103
FBgn0010341	1622.69040167057	-0.498826959038565	0.36159307088345	-1.37952576862113	0.167732706830311	0.862280468618376
FBgn0010342	260.467742403221	-0.567831806395619	0.50881939787365	-1.11597908564135	0.264431087065375	0.862280468618376
FBgn0010348	5959.93272492986	-0.496444414337437	0.411670329956486	-1.20592711743378	0.227845593647354	0.862280468618376
FBgn0010350	4131.20338366675	-0.177430551707356	0.182079604012597	-0.974466924340851	0.329824754167617	0.862280468618376
FBgn0010352	17180.6543982061	-0.285343941865715	0.21828542106303	-1.30720567812599	0.191142867624053	0.862280468618376
FBgn0010355	1487.92037735234	-0.123866001695128	0.320482328195215	-0.386498695240623	0.699127368728891	0.931383057636908
FBgn0010356	267.199510500166	-0.234209659054757	0.307764597939154	-0.761002599464221	0.446655514615224	0.868918671489606
FBgn0010357	30938.7461377332	-0.16650228241303	0.221909623341991	-0.75031573622397	0.453064567278818	0.871330352614604
FBgn0010358	45.103429962392	0.795891994144015	0.603469691334569	1.31885992879594	0.187215944688079	0.862280468618376
FBgn0010359	0	NA	NA	NA	NA	NA
FBgn0010379	1737.0785107974	-0.382779733753931	0.330585828977932	-1.15788306757542	0.246911758320764	0.862280468618376
FBgn0010380	1391.17917204798	-0.193065733514616	0.220918677960973	-0.873922183930156	0.382160632714142	0.862280468618376
FBgn0010381	2139.34759821032	1.9631062360031	0.982482836484257	1.99810741023012	NA	NA
FBgn0010382	452.965183234422	-0.486493206370699	0.462005963579535	-1.05300200586469	0.292340072759369	0.862280468618376
FBgn0010383	291.602886093233	-0.3676121834252	0.215430714491212	-1.70640562694785	0.0879325836785216	0.862280468618376
FBgn0010385	260.990935456767	-0.174673830252562	0.395069145420258	-0.442134832034912	0.658391640161958	0.919450795463945
FBgn0010387	8329.41148837416	0.0742560003251039	0.232586816974423	0.31926143231613	0.749528276064709	0.94713873078807
FBgn0010388	564.124311216378	2.33520440719209	1.02858391986589	2.2703100467452	NA	NA
FBgn0010389	479.762229241184	-0.262110107628322	0.209666439177456	-1.25012905573543	0.21125240731217	0.862280468618376
FBgn0010391	1816.6251505937	0.257483850451839	0.252756395509093	1.01870360167633	0.308343702188687	0.862280468618376
FBgn0010395	407.77025975795	-0.392542605447271	0.368459474745978	-1.06536168113982	0.286712290140032	0.862280468618376
FBgn0010397	1418.81609095095	-0.0883153062234751	0.143240595425684	-0.616552213854032	0.537530122074911	0.884806644708793
FBgn0010398	167.652019955226	-0.156334604107839	0.325571312546092	-0.480185440434671	0.631095538688306	0.908805831277673
FBgn0010399	332.835740568782	-0.0461922750826619	0.302267585680944	-0.152819148565337	0.8785408967334	0.970554011693653
FBgn0010401	1316.18567193876	0.363291238068249	0.329332233331188	1.10311473126565	0.269977344308782	0.862280468618376
FBgn0010403	1266.90869039628	0.306939820845838	0.21040365755633	1.45881409292357	0.144616282669446	0.862280468618376
FBgn0010406	935.543035074919	-0.235018116763968	0.257949787688431	-0.911100252766398	0.362242553288407	0.862280468618376
FBgn0010407	60.7191206262388	0.0175375647174863	0.269228840408728	0.065139992769206	0.948062538407681	0.995482779318374
FBgn0010408	16116.5672018221	0.463218732095806	0.352283714941029	1.31490248470142	0.188542677591138	0.862280468618376
FBgn0010409	17854.0721457497	0.329805121385145	0.337987710665107	0.975790275735589	0.329168404626699	0.862280468618376
FBgn0010411	19785.0459319826	0.232926742437215	0.205587339325738	1.13298193945767	0.257221837793119	0.862280468618376
FBgn0010412	11878.0829657883	0.192075589534765	0.314957771923548	0.609845530598271	0.5419641374536	0.885297275953961
FBgn0010414	213.268631022934	0.202749209957499	0.277044272628259	0.731829638757955	0.46427255625443	0.872738829151699
FBgn0010415	3677.14064028286	-0.427127996744324	0.277370005896188	-1.53992136014947	0.123579523446967	0.862280468618376
FBgn0010416	421.077448314256	-0.309976872200341	0.342462058589971	-0.90514223232967	0.365390040981533	0.862280468618376
FBgn0010417	499.965502541015	0.107527371818132	0.13143429502136	0.818107418620517	0.413295853157618	0.863505398638206
FBgn0010421	376.235953456508	-0.0924016537291403	0.229359820155975	-0.402867658626096	0.687045584502316	0.928454029210634
FBgn0010422	863.778197175757	-0.01803679700117	0.138684337848831	-0.130056481365838	0.896521740445209	0.976781094745317
FBgn0010423	743.620551141947	0.151149062201173	0.327655618247463	0.461304655814011	0.644580045103772	0.912889494011137
FBgn0010424	1056.99030735782	-0.0887189275434377	0.250431418131788	-0.354264365890185	0.723140770164547	0.939268212661704
FBgn0010425	3320.44770648124	-0.321362985715341	0.264803545532684	-1.21359019218901	0.224904254154774	0.862280468618376
FBgn0010431	218.545174143647	-2.06467822423876	1.21466092448627	-1.69979801162369	0.0891689256815719	0.862280468618376
FBgn0010433	1.71578017318759	-0.255402052098884	2.16510609791418	-0.117962834405636	0.906097106068675	0.981113694972531
FBgn0010434	3649.28677985253	-0.322896512324268	0.389025836071862	-0.830013028401078	0.406531417581774	0.863505398638206
FBgn0010435	8325.758408227	-0.179278394006351	0.134636185893044	-1.33157659523103	0.182999360051688	0.862280468618376
FBgn0010438	207.320268295774	-0.362664843930082	0.411164176086764	-0.882043876929473	0.377753080214738	0.862280468618376
FBgn0010441	256.279043156047	-0.148630616527798	0.287372447950818	-0.517205520527963	0.605012698725535	0.901676720310392
FBgn0010452	230.346752947967	-0.303251982027384	0.228023391253121	-1.32991611238144	0.183545912087257	0.862280468618376
FBgn0010453	96.48612183501	-0.121874039184906	0.232122614481324	-0.52504164429318	0.59955424153514	0.900705372288995
FBgn0010470	2980.69505438476	-0.195294803576842	0.122503321087379	-1.59420007427833	0.110891229899426	0.862280468618376
FBgn0010473	2006.53212034307	-0.363129957687983	0.410058135686038	-0.885557256608156	0.375856153117814	0.862280468618376
FBgn0010482	5567.308417721	-0.49775904731004	0.257104009406473	-1.93602211205932	0.0528649928269518	0.862280468618376
FBgn0010488	8810.53234678874	-0.24976551435489	0.366702130037596	-0.681112799451922	0.495800118746912	0.879632325379337
FBgn0010497	1174.23252557256	-0.318496670182899	0.317163036978739	-1.00420488218572	0.315279869364981	0.862280468618376
FBgn0010501	154.119075218377	-0.361693569622757	0.305384768384473	-1.18438641041649	0.236260137155939	0.862280468618376
FBgn0010504	3980.70080628592	0.289205240941468	0.202482257980715	1.42829916964385	0.153205766751626	0.862280468618376
FBgn0010516	4459.49073044185	0.0321214317614347	0.164099647313719	0.195743453976024	0.84481097091026	0.96678208028489
FBgn0010520	176.684527640285	0.0482671751626683	0.220452172163731	0.2189462443891	0.826691922477311	0.962423699994744
FBgn0010531	447.388192989986	-0.0639546687500456	0.149671423057652	-0.427300465536502	0.669160493782876	0.921920700168549
FBgn0010548	4845.65163567277	-0.246065712551896	0.177285873285898	-1.38796006693145	0.165149205323176	0.862280468618376
FBgn0010549	57.930028552073	0.403041814069153	0.347609164157175	1.15946832140166	0.24626534196034	0.862280468618376
FBgn0010551	4910.71943018546	0.222634014774821	0.207755922989878	1.07161332187707	0.283893747224304	0.862280468618376
FBgn0010575	2385.81961732158	-0.110515981355424	0.40448539749769	-0.273226133845919	0.784679392088233	0.948984898453202
FBgn0010583	1618.160018166	-0.0857353506910523	0.181220053623912	-0.473100790870418	0.63614127257609	0.909143540896539
FBgn0010590	3144.02342430985	0.246125939978078	0.267531782429378	0.919987665551659	0.357579204910085	0.862280468618376
FBgn0010591	1117.3277415328	-0.168716657072427	0.157610445936764	-1.07046621224661	0.284409509656552	0.862280468618376
FBgn0010602	1418.19698081595	0.0849045921874946	0.165722268262418	0.512330618435958	0.608419639848816	0.901676720310392
FBgn0010607	292.885416352361	-0.178151586724253	0.291522667006296	-0.611107151816791	0.541128645448984	0.885297275953961
FBgn0010611	2990.1728525795	-0.0702379943263897	0.179697208438363	-0.390868589093756	0.695894372914915	0.930366275358612
FBgn0010612	8028.30970967258	0.180476517545209	0.301348774103919	0.598895807961616	0.549242367079862	0.886256484798892
FBgn0010620	1482.55877276619	-0.192436727173942	0.160201623260399	-1.2012158382512	0.229667487194758	0.862280468618376
FBgn0010621	1539.02635240503	-0.0358107573053769	0.159918499907157	-0.223931298293615	0.822810761558923	0.960815224684149
FBgn0010622	334.996979988283	-0.144054589344358	0.143082553821276	-1.00679352930963	0.314034004801617	0.862280468618376
FBgn0010638	2614.75704379345	0.153315165774752	0.250839868733594	0.611207327402889	0.541062333071516	0.885297275953961
FBgn0010651	1909.15742795298	-0.274397464475858	0.323367312754544	-0.848562775682103	0.396124627523557	0.862280468618376
FBgn0010660	800.038888702581	-0.177679257495902	0.246733602784797	-0.720125898906745	0.471447482797651	0.873915538808634
FBgn0010741	880.82076281757	-0.102040155711536	0.18360335962076	-0.555764098883069	0.578372131055864	0.893966966489364
FBgn0010747	2566.08112119772	0.049022631746217	0.121970298901409	0.401922699114174	0.687740916731002	0.928454029210634
FBgn0010750	633.965633513727	0.0744191753117777	0.121584090869281	0.612079876402482	0.540484911000043	0.885297275953961
FBgn0010762	906.937643943265	-0.335369871255197	0.306134950605062	-1.09549684082903	0.273299028801575	0.862280468618376
FBgn0010768	90.613134135439	-0.478471425629674	0.326591193720475	-1.46504692970745	0.14290811433001	0.862280468618376
FBgn0010770	181.478588940047	-0.305914754975262	0.331728184424554	-0.922184997653815	0.356432087098865	0.862280468618376
FBgn0010772	2250.24854766044	0.164030625049822	0.159174463485578	1.03050842112424	0.302771401196416	0.862280468618376
FBgn0010774	1609.49669879142	-0.131666966413036	0.215793526545026	-0.610152531084215	0.541760771198333	0.885297275953961
FBgn0010786	2414.65509357609	-0.0372135744658533	0.129612519459558	-0.287114042848805	0.774025000016288	0.947820762446549
FBgn0010803	1261.75826157402	0.112647362074786	0.104320896149105	1.07981589722714	0.280224170580934	0.862280468618376
FBgn0010808	2143.41025134204	0.0450735698679271	0.263624432858058	0.170976450776077	0.864242282480305	0.970151593571103
FBgn0010812	731.63559676854	-0.146198065035876	0.158422140032661	-0.922838594439738	0.356091324765795	0.862280468618376
FBgn0010825	2953.01019323169	-0.308366876736711	0.480573212424545	-0.641664721970177	0.521090899635793	0.881876796477609
FBgn0010830	399.107124045269	-0.10892847527476	0.132424895587684	-0.822567952886426	0.410753729121392	0.863505398638206
FBgn0010877	1267.47742863793	-0.246517766651646	0.227940789233502	-1.08149913615993	0.279475144738524	0.862280468618376
FBgn0010894	420.849638931862	-0.396307198264954	0.249963594457526	-1.58545967113741	0.112861932860642	0.862280468618376
FBgn0010905	2644.40324931296	-0.17388410706384	0.429092679619599	-0.405236713005667	0.685303521147435	0.92721543696514
FBgn0010909	2657.56150127343	-0.259236465106968	0.376563137846806	-0.6884276209012	0.49118353506727	0.878396178577716
FBgn0010926	328.871752167748	-0.259864847197122	0.303462993659045	-0.856331258265686	0.391814576013707	0.862280468618376
FBgn0011016	2419.06273223849	0.0724236889351959	0.175593708555687	0.412450363574546	0.680009355115639	0.925919706305789
FBgn0011020	153.347598971418	-0.316310388692347	0.340550618099151	-0.928820480367632	0.352982128805735	0.862280468618376
FBgn0011202	1555.88339844314	-0.304820496930153	0.334532456086135	-0.911183627730482	0.362198629023307	0.862280468618376
FBgn0011204	2451.91361181314	-0.426738349291566	0.290102728784738	-1.47099046975257	0.141293694232919	0.862280468618376
FBgn0011205	4452.30343138403	-0.293440189722047	0.197550231909426	-1.48539531888064	0.137439134971344	0.862280468618376
FBgn0011206	10905.4890865862	0.0236295165686168	0.127616407023896	0.185160490877887	0.853103156916276	0.968503809527251
FBgn0011207	916.125328848387	-0.142903446599794	0.27788246863657	-0.51425859033479	0.607071209139672	0.901676720310392
FBgn0011211	31120.7682952258	-0.122916084132891	0.128645711992779	-0.955461960051886	0.339344133468855	0.862280468618376
FBgn0011217	8977.97095275597	-0.276276775778256	0.312637649898722	-0.883696432172371	0.376860106836863	0.862280468618376
FBgn0011224	4278.25909475642	-0.153951522228872	0.22087236570563	-0.697015770791594	0.485792924219825	0.877265858430844
FBgn0011225	7948.68133272106	-0.0329813249734042	0.214335069487368	-0.153877408173505	0.877706397592845	0.970554011693653
FBgn0011227	4175.94043273364	0.188151630981415	0.344816605548372	0.545657105701715	0.585301662350218	0.894854747929663
FBgn0011230	10811.5490560071	-0.270349306068672	0.368367310891456	-0.733912315439775	0.463002180708992	0.871979853153491
FBgn0011232	594.957523205043	-0.1404064087137	0.166117763702186	-0.845222121852178	0.397986833234556	0.862280468618376
FBgn0011236	660.65737899671	0.0621148381783685	0.142603220196682	0.435578089279457	0.663142870737337	0.920182903888525
FBgn0011239	1236.10093071541	0.291259545537755	0.326249361084899	0.892751313195557	0.371990364369693	0.862280468618376
FBgn0011241	495.827562872007	0.0705972810129843	0.136987863593417	0.515354274175109	0.606305479054608	0.901676720310392
FBgn0011244	13069.707732403	0.257153979337391	0.205276494745772	1.25272004306127	0.210307609080519	0.862280468618376
FBgn0011259	787.231237269009	-0.466045338700197	0.417340050744946	-1.1167040830812	0.264120871474603	0.862280468618376
FBgn0011260	463.983997056641	-0.660549748262949	0.500474703725202	-1.31984642449709	0.186886298064585	0.862280468618376
FBgn0011270	6617.23391241387	0.474103423061325	0.324317576010204	1.4618493049122	0.143782509575525	0.862280468618376
FBgn0011272	14244.3124454877	0.117009787036251	0.254023651795753	0.460625560687287	0.645067269813394	0.913025803135081
FBgn0011273	0	NA	NA	NA	NA	NA
FBgn0011274	1712.26238735944	-0.324166945121596	0.286179379704127	-1.13274040029279	0.257323286474277	0.862280468618376
FBgn0011276	6.2286873406362	2.3935716539874	0.833337013058417	2.87227330177355	0.00407530354275289	0.862280468618376
FBgn0011277	5.53578773161408	-0.326082834051982	0.717277581831514	-0.454611774174448	0.649388562624014	0.914682246205195
FBgn0011278	65.3047409462978	-0.0186374819829272	0.413605456089846	-0.0450610157784733	0.964058674742057	0.999134208608723
FBgn0011279	324.61162086366	0.193617251426127	0.347821586362232	0.556656800548566	0.577761937607044	0.893427115943538
FBgn0011280	9356.74094080322	0.239316985351013	0.307580198791597	0.778063692953015	0.436531465376286	0.867064436968226
FBgn0011281	1415.35833829153	0.347759592596376	0.277761648593157	1.25200723122776	0.210567229021733	0.862280468618376
FBgn0011282	227.277226358182	0.504974771074743	0.352611482072589	1.43209962451191	0.152115311925898	0.862280468618376
FBgn0011283	490.157007551989	0.217772454502906	0.370050214446168	0.588494334015813	0.556200535845559	0.888378133904133
FBgn0011284	22115.4028256415	0.392489571367668	0.35234302519883	1.11394165145225	0.265304219218435	0.862280468618376
FBgn0011286	6322.03540530364	-0.270968402009326	0.365758541946619	-0.740839572924788	0.458790717751863	0.871330352614604
FBgn0011288	1920.3047876193	-0.308934948392304	0.228202169004002	-1.3537774410325	0.175807392878373	0.862280468618376
FBgn0011289	1398.17679805801	-0.00917410632736371	0.101582264509	-0.0903120871709936	0.928039215230408	0.988484846012707
FBgn0011290	528.432160186298	0.0155559638820452	0.215897520472853	0.0720525360734804	0.94256009871996	0.993552052414429
FBgn0011291	201.024806779868	0.226176740910752	0.169087254787527	1.33763328995413	0.181016006964015	0.862280468618376
FBgn0011293	1617.46048656591	0.520511236352016	0.375305141015088	1.38690142891245	0.165471822085232	0.862280468618376
FBgn0011294	308.501151127073	0.687285585600384	0.472672866273974	1.45404070053392	0.145935022459057	0.862280468618376
FBgn0011296	4403.47310156806	0.489975861292094	0.306508254897484	1.59857313290297	0.109915483472193	0.862280468618376
FBgn0011297	358.01463507515	0.156823048741535	0.214324164776496	0.731709599358872	0.464345836075159	0.872738829151699
FBgn0011300	1380.50001083908	-0.436407680171181	0.274060368809569	-1.59237792048079	0.111299814270316	0.862280468618376
FBgn0011305	803.734857252965	-0.130679671735407	0.163456934047038	-0.799474629187658	0.424015252101807	0.865018364870926
FBgn0011327	3139.95921375976	0.172792044256088	0.129670576219855	1.33254628222768	0.182680743554949	0.862280468618376
FBgn0011335	267.785675066649	-0.143766866524173	0.218978803988835	-0.656533253015226	0.511481079193603	0.880871907382998
FBgn0011336	3732.40618205512	0.14420919047134	0.217929192008198	0.661724981139358	0.508147491767152	0.880871907382998
FBgn0011361	3757.39456865541	0.163009112064485	0.239389521666729	0.680936704871406	0.495911541608831	0.879632325379337
FBgn0011455	4324.97348812904	-0.0543718665246928	0.241300197389424	-0.225328727920369	0.821723552607862	0.960765297365538
FBgn0011474	738.896756310195	-0.311645088680913	0.262242954132988	-1.1883830767208	0.234682520711694	0.862280468618376
FBgn0011476	343.635292728732	0.193589693448957	0.228486412995632	0.84727004512368	0.396844619076922	0.862280468618376
FBgn0011481	1403.76080721727	-0.566656203572047	0.448486996093602	-1.26348413333657	0.206415245223206	0.862280468618376
FBgn0011509	617.978039283642	0.0174220841611379	0.196937867865213	0.0884648765115188	0.929507199340033	0.988539563165411
FBgn0011554	219.698526000751	-0.208321159262715	0.152599368011266	-1.36515086515518	0.172205637818088	0.862280468618376
FBgn0011555	2305.94142627542	-0.0906537266616264	0.151225012013317	-0.599462519160809	0.548864496925792	0.885902082458555
FBgn0011556	903.486614170761	0.28871759892059	0.232757367967301	1.2404230269572	0.214818968273815	0.862280468618376
FBgn0011559	44761.6666318084	0.0129834580757824	0.185060533329297	0.0701578982952549	0.944067984006556	0.993674476008189
FBgn0011566	204.696732029675	-0.123198882648318	0.172495571550801	-0.714214756591797	0.475094393399057	0.874214035933752
FBgn0011569	395.782217489737	0.0475399261638	0.181957054831202	0.261270035437217	0.793884272496028	0.950406254621645
FBgn0011570	820.114418605672	-0.170281555906519	0.236610169833773	-0.719671331228694	0.471727381691442	0.873915538808634
FBgn0011571	1554.88133912823	-0.0299168531914575	0.143890917226857	-0.207913423362858	0.835296567871806	0.964174743488626
FBgn0011573	1838.54263586838	0.0690028588324634	0.110505616542635	0.62442852219951	0.532346198485149	0.884557653211185
FBgn0011576	837.438330720589	-0.0150261178418783	0.228702144516424	-0.0657016919261952	0.947615325363635	0.99523168078144
FBgn0011581	1197.21301924321	0.339106309608972	0.309531232432524	1.09554795793635	0.273276647111753	0.862280468618376
FBgn0011582	244.962604734989	-0.564428035684318	0.28433911539147	-1.98505237278814	0.0471386449118529	0.862280468618376
FBgn0011584	4258.03379691729	-0.162965113304096	0.162504215983409	-1.00283621761994	0.315939891039582	0.862280468618376
FBgn0011586	993.937313943814	-0.113049771860636	0.151515094336571	-0.74612877585325	0.4555896279125	0.871330352614604
FBgn0011589	202.7484666875	-0.0987136088431527	0.284196871378191	-0.34734234885996	0.728334139085735	0.941139587131361
FBgn0011591	323.821892248291	-0.0901016336236129	0.123969797577278	-0.726803103533722	0.467346581613134	0.873193155347209
FBgn0011592	731.987137397589	-0.306810098692006	0.153380540349087	-2.0003195841775	0.0454657656059766	0.862280468618376
FBgn0011596	1990.04666165446	-0.0247586408735274	0.148736423932272	-0.166459836931413	0.867795087646833	0.970151593571103
FBgn0011603	1279.0717534951	-0.0358138540520289	0.16562032811065	-0.216240690141018	0.828800137623507	0.963194278352113
FBgn0011604	1762.71919172539	-0.0460821430958082	0.274880199026358	-0.167644462056685	0.866862990509624	0.970151593571103
FBgn0011606	2427.38474653772	0.117451785068184	0.207404526783938	0.566293257381691	0.571194443229477	0.89137639634554
FBgn0011638	1194.26862516283	-0.163287250980073	0.231104423544047	-0.706551819632095	0.479845039132694	0.875898244713095
FBgn0011640	1632.4927582323	0.119552888503124	0.145024182879239	0.824365192960091	0.409732086033755	0.863505398638206
FBgn0011642	1705.19082956921	-0.272062806201374	0.297260604940118	-0.915233305994853	0.36006916328967	0.862280468618376
FBgn0011648	1053.67144629062	-0.34023237981627	0.284809858503122	-1.19459481355187	0.232245376597922	0.862280468618376
FBgn0011653	41.0768711116655	-0.0244116085952292	0.758428556555322	-0.032187090510019	0.974322851126771	0.999335904544736
FBgn0011655	600.608209980723	-0.0121062156454032	0.224807769104942	-0.0538514113351301	0.957053548589765	0.997232234149335
FBgn0011656	2072.31794223244	-0.352516349730828	0.241171674991925	-1.46168222177265	0.143828311247908	0.862280468618376
FBgn0011659	109.524082983387	-0.129636883338853	0.257902493446238	-0.502658510999923	0.615204384158617	0.902845333861396
FBgn0011660	397.512398638667	-0.00318508362541235	0.346046358881207	-0.00920421077600687	0.992656206018901	1
FBgn0011661	5385.13804035246	-0.440585183635947	0.377845902993718	-1.16604462333755	0.24359640421206	0.862280468618376
FBgn0011666	1552.59394387332	-0.458201810112593	0.333197005201199	-1.3751678525319	0.169079412305148	0.862280468618376
FBgn0011668	48466.9674875987	0.912748640639735	0.608029761550552	1.50115783528772	0.133314742812189	0.862280468618376
FBgn0011669	70621.0947046712	0.891082470359788	0.632915909086382	1.40790025589035	0.159160607322408	0.862280468618376
FBgn0011670	10247.7391016335	0.645112072225113	0.492913402675062	1.30877364811763	0.190611035808334	0.862280468618376
FBgn0011672	1372.1319059561	-0.383411750735134	0.297818673298405	-1.28739996887626	0.197954915181882	0.862280468618376
FBgn0011674	247.120498275113	-0.306404053713802	0.343824444617407	-0.891164251147864	0.372841059742383	0.862280468618376
FBgn0011676	255.886767652221	-0.0469829927515152	0.227781755652262	-0.206263195298401	0.836585326245765	0.964174743488626
FBgn0011692	164.055864062951	-0.513552076855756	0.570758208605135	-0.899771688103822	0.368241764032258	0.862280468618376
FBgn0011693	5823.16229861636	0.191932304742553	0.195434012323903	0.982082404491873	0.326059253161873	0.862280468618376
FBgn0011694	41872.188585944	0.0706747274249327	0.280323321326404	0.252118614642982	0.800949382206941	0.953199818708086
FBgn0011695	27034.8252744056	0.0680270735507219	0.272414202054006	0.249719262203648	0.802804460960228	0.953848721262073
FBgn0011701	287.92785601802	-0.107094784336231	0.239119700793601	-0.447871020166049	0.654246284264337	0.917084054831891
FBgn0011703	222.740036493057	-1.70427298742295	0.780075469898171	-2.1847539798238	0.0289068899638013	0.862280468618376
FBgn0011704	424.271787000129	-0.566845385068079	0.481221998594247	-1.17792907789743	0.23882488158363	0.862280468618376
FBgn0011705	508.286231462373	-0.50073628096703	0.358911494884917	-1.39515253231883	0.162969847618731	0.862280468618376
FBgn0011706	32.9866525395759	-0.494278159101911	0.366529199072502	-1.34853692516906	0.177485752106228	0.862280468618376
FBgn0011708	1851.18335390734	-0.10219948293164	0.0843400005765805	-1.21175577700931	0.225605881093239	0.862280468618376
FBgn0011710	732.418879045953	-0.242733464576904	0.252417617893647	-0.961634400175571	0.336233285171659	0.862280468618376
FBgn0011715	485.832309033064	0.196025221982414	0.22502773081678	0.87111584546004	0.383690903113861	0.862280468618376
FBgn0011722	1584.68872560902	-0.399211225556288	0.24313340910905	-1.64194310859695	0.100601794859968	0.862280468618376
FBgn0011723	208.080239549113	0.216572090042712	0.244706099144051	0.885029391585466	0.376140779426464	0.862280468618376
FBgn0011725	9009.60937589331	0.156796010633127	0.154372656580639	1.01569807831365	0.309773183419428	0.862280468618376
FBgn0011726	5058.07321100539	-0.0956949624898007	0.16518979421612	-0.579303115812357	0.562384663489716	0.889825455846315
FBgn0011737	1694.12719097827	0.101392891577236	0.145215366264314	0.698224259495277	0.485036957294186	0.877138491383261
FBgn0011739	1645.5666371423	-0.110221216302937	0.283438827771313	-0.388871267813269	0.69737137756061	0.930759280292248
FBgn0011740	880.115938252098	0.0344297283038318	0.181253307721206	0.189953655117785	0.84934544709346	0.967231224150112
FBgn0011741	329.439111811823	0.104872049408914	0.204294897315506	0.513336606968469	0.607715881241081	0.901676720310392
FBgn0011742	1581.91489521043	-0.175278601655551	0.209328582187596	-0.837337165444848	0.402403074150428	0.862601732273624
FBgn0011743	2470.64959520464	0.282219306409169	0.180655679766764	1.56219448385752	0.118242179706043	0.862280468618376
FBgn0011745	1598.2622619176	0.0658587136284262	0.142973516185923	0.460635755385517	0.645059954380955	0.913025803135081
FBgn0011746	660.237580415549	-0.218672411645378	0.206435918779153	-1.05927501831363	0.289474548698001	0.862280468618376
FBgn0011747	4580.37022133154	-0.530346304679352	0.427565786247072	-1.24038527342056	0.214832925349209	0.862280468618376
FBgn0011754	3765.77027942551	-0.0241186934123661	0.120553635538307	-0.200066080999293	0.841428900479375	0.965703349132526
FBgn0011758	55.9757787869546	-0.282079073460073	0.250222978133461	-1.12731083118042	0.259611084557047	0.862280468618376
FBgn0011760	5596.76573813774	-0.208786801055191	0.189906767989189	-1.09941737867434	0.271586053888479	0.862280468618376
FBgn0011761	1575.21958747622	-3.84849794541274	1.7179829196056	-2.24012584845503	0.0250827538748288	0.862280468618376
FBgn0011762	61.6956239099589	-0.363689942759004	0.409988991489009	-0.887072458794917	0.375039890793646	0.862280468618376
FBgn0011763	1101.84643072535	-0.351314504772771	0.295624928994883	-1.18837915992819	0.234684063138328	0.862280468618376
FBgn0011764	1136.53656575996	-0.448868226306448	0.356709817147257	-1.25835680637056	0.208262745533935	0.862280468618376
FBgn0011766	1888.28385547727	-0.472298593729778	0.378969150048752	-1.24627187640213	0.212664599111697	0.862280468618376
FBgn0011768	2885.74874738584	0.0739894880866908	0.126094352877608	0.58677876049301	0.557352303267917	0.888533416057366
FBgn0011769	263.678186003773	0.252196568248665	0.286467521556471	0.880367054800484	0.378660497826276	0.862280468618376
FBgn0011770	2041.11759028739	0.165757583623377	0.237686336332496	0.697379522024777	0.485565313551538	0.877265858430844
FBgn0011771	562.015550829263	-0.225578826869509	0.244090369347747	-0.924161110789811	0.355402439885742	0.862280468618376
FBgn0011774	180.363781778935	-0.167442285163726	0.331512713241317	-0.505085562259691	0.613498741446887	0.902338086698664
FBgn0011785	1105.18694709141	-0.249557365074908	0.379684682160824	-0.657275304483319	0.511003912628338	0.880871907382998
FBgn0011787	714.695426513456	0.309309762222531	0.293999212666615	1.0520768386318	0.292764297577856	0.862280468618376
FBgn0011802	1165.12863187137	-0.0927097993185063	0.186574328469854	-0.49690544288083	0.619255733105408	0.90507352214699
FBgn0011812	0.189410426026757	-1.76291408845451	3.81114529006474	-0.462568061377833	0.643674006261268	0.912556149538419
FBgn0011817	2131.83309568704	-0.134451310606171	0.288095980454226	-0.466689297067557	0.640722188323183	0.911537151776678
FBgn0011818	968.045509248258	-0.0798158373610763	0.113285467507138	-0.704554954112247	0.481087239732665	0.87636988870685
FBgn0011822	184.981776049197	-0.508190491924658	0.276274875027627	-1.83943795784485	0.0658507954419714	0.862280468618376
FBgn0011824	592.337951429457	0.273875773635144	0.320779709611059	0.853781475041594	0.393226080609737	0.862280468618376
FBgn0011826	1134.56706738346	-0.423272587559542	0.369173807803256	-1.14654013533137	0.25157173039956	0.862280468618376
FBgn0011828	999.658584320375	-0.158753296398455	0.179237650809357	-0.885713998602392	0.375771663004996	0.862280468618376
FBgn0011829	49.9198985555458	-0.19455214731006	0.477759531769618	-0.407217720156081	0.683848087912482	0.926754671955565
FBgn0011832	0	NA	NA	NA	NA	NA
FBgn0011834	193.213699983486	0.0608662506453858	0.20097711731612	0.302851645292774	0.762002923185692	0.947820762446549
FBgn0011836	427.459430293081	0.105835163514967	0.190658239414056	0.555104063901076	0.578823483254083	0.893966966489364
FBgn0011837	1523.45259416434	-0.598584263240436	0.413716070819211	-1.44684798454931	0.14793950406452	0.862280468618376
FBgn0011840	0	NA	NA	NA	NA	NA
FBgn0011844	2.60948211841602	0.11487780990186	1.25468752820049	0.0915588999809541	0.927048507295608	0.988144395427522
FBgn0011845	1.08129616970979	0.0195173606810569	1.64878744569715	0.0118374025299571	0.990555339852602	1
FBgn0011848	0	NA	NA	NA	NA	NA
FBgn0011849	0	NA	NA	NA	NA	NA
FBgn0011850	0	NA	NA	NA	NA	NA
FBgn0011851	0	NA	NA	NA	NA	NA
FBgn0011852	0	NA	NA	NA	NA	NA
FBgn0011853	0	NA	NA	NA	NA	NA
FBgn0011854	0	NA	NA	NA	NA	NA
FBgn0011855	0	NA	NA	NA	NA	NA
FBgn0011858	0	NA	NA	NA	NA	NA
FBgn0011859	0	NA	NA	NA	NA	NA
FBgn0011860	0	NA	NA	NA	NA	NA
FBgn0011861	0.162805803333611	0	3.81693625648277	0	1	1
FBgn0011862	0	NA	NA	NA	NA	NA
FBgn0011863	0	NA	NA	NA	NA	NA
FBgn0011864	0	NA	NA	NA	NA	NA
FBgn0011865	0.0813331352423052	0.603499852806475	3.81693625648277	0.158111064019337	0.874369282450896	0.970151593571103
FBgn0011866	0	NA	NA	NA	NA	NA
FBgn0011867	0	NA	NA	NA	NA	NA
FBgn0011868	0	NA	NA	NA	NA	NA
FBgn0011869	0	NA	NA	NA	NA	NA
FBgn0011870	0	NA	NA	NA	NA	NA
FBgn0011871	0	NA	NA	NA	NA	NA
FBgn0011872	0.119183042899089	-1.07961083128251	3.81693625648277	-0.282847487811429	0.777293750023285	0.947820762446549
FBgn0011877	0.241192911018029	0.603493847457551	3.81693625648277	0.158109490676603	0.874370522203321	0.970151593571103
FBgn0011878	0.256313228794759	0	3.81693625647616	0	1	1
FBgn0011879	0.389910015954386	-0.120178180283355	3.76421560666825	-0.0319264869075144	0.974530675905384	0.999335904544736
FBgn0011880	0	NA	NA	NA	NA	NA
FBgn0011881	0.289552188366302	0.845240481506009	3.76502630151625	0.224497895583256	0.822369904212442	0.960765297365538
FBgn0011882	0	NA	NA	NA	NA	NA
FBgn0011883	0	NA	NA	NA	NA	NA
FBgn0011884	0	NA	NA	NA	NA	NA
FBgn0011885	0	NA	NA	NA	NA	NA
FBgn0011887	0.0925714499852765	0	3.81693625648277	0	1	1
FBgn0011888	0.745622725326067	-0.0411456198506224	2.72395295729527	-0.0151051139633034	0.987948321075407	1
FBgn0011889	2.44397772091245	-0.411320156713473	1.24163751929543	-0.331272332159291	0.740438788274911	0.944522273052594
FBgn0011890	0.186078875446425	0	3.81693625647833	0	1	1
FBgn0011891	3.19267837862007	0.0399696366090004	1.10530828273276	0.0361615281758132	0.971153561980654	0.999335904544736
FBgn0011892	1.14985504113049	0.261848344280897	1.74325415281354	0.150206637315784	0.880601589487087	0.970955889932188
FBgn0011893	1.46041106231309	-1.24041516162286	1.61983796229171	-0.765764965693206	0.443816163615142	0.868898993853825
FBgn0011894	1.04901961280697	-2.19396284427226	2.00538211082421	-1.09403730711976	0.27393861632781	0.862280468618376
FBgn0011895	1.2892219105327	0.310142018408331	1.62706337133042	0.190614590601185	0.848827558143657	0.967231224150112
FBgn0011896	0	NA	NA	NA	NA	NA
FBgn0011897	0.40399871435164	0.603485254639499	3.81693625647327	0.158107239442636	0.874372296116631	0.970151593571103
FBgn0011902	0	NA	NA	NA	NA	NA
FBgn0011904	0.0813331352423052	0.603499852806475	3.81693625648277	0.158111064019337	0.874369282450896	0.970151593571103
FBgn0011905	0	NA	NA	NA	NA	NA
FBgn0011906	0	NA	NA	NA	NA	NA
FBgn0011909	1.23720333864243	1.34414358668359	2.18514628174654	0.61512750789812	0.538470517030385	0.884967356333787
FBgn0011910	0.0864921440367641	0.603499852806475	3.81693625648277	0.158111064019337	0.874369282450895	0.970151593571103
FBgn0011915	0	NA	NA	NA	NA	NA
FBgn0011916	1.11605847593537	1.39688620020993	2.15498810634784	0.648210630998467	0.516848726881631	0.880871907382998
FBgn0011919	0	NA	NA	NA	NA	NA
FBgn0011921	0.0864921440367641	0.603499852806475	3.81693625648277	0.158111064019337	0.874369282450895	0.970151593571103
FBgn0011927	0	NA	NA	NA	NA	NA
FBgn0011928	0	NA	NA	NA	NA	NA
FBgn0011931	0.0947052130133785	-1.07961083128251	3.81693625648277	-0.282847487811429	0.777293750023285	0.947820762446549
FBgn0011932	0	NA	NA	NA	NA	NA
FBgn0011933	0	NA	NA	NA	NA	NA
FBgn0011934	0	NA	NA	NA	NA	NA
FBgn0011935	0	NA	NA	NA	NA	NA
FBgn0011936	0.16266627048461	1.4892528984414	3.77228521403065	0.394787990288292	0.692999358879694	0.929200127588175
FBgn0011937	0.325611606667221	0	3.81693625647327	0	1	1
FBgn0011938	0	NA	NA	NA	NA	NA
FBgn0011944	0	NA	NA	NA	NA	NA
FBgn0011945	0	NA	NA	NA	NA	NA
FBgn0011948	0	NA	NA	NA	NA	NA
FBgn0011949	0	NA	NA	NA	NA	NA
FBgn0011950	0	NA	NA	NA	NA	NA
FBgn0011951	0	NA	NA	NA	NA	NA
FBgn0011952	0	NA	NA	NA	NA	NA
FBgn0011953	0	NA	NA	NA	NA	NA
FBgn0011954	0	NA	NA	NA	NA	NA
FBgn0011955	0	NA	NA	NA	NA	NA
FBgn0011956	0.0935074254611484	0	3.81693625648277	0	1	1
FBgn0011957	0.116567900292774	-1.07961083128251	3.81693625648277	-0.282847487811429	0.777293750023285	0.947820762446549
FBgn0011958	0.238366085798179	-1.92154272753486	3.80448570173753	-0.505072926586971	0.613507615930132	0.902338086698664
FBgn0011959	0.661343562525875	-0.928119687030814	2.78005927407538	-0.33384888433341	0.738493593213202	0.943884414088857
FBgn0011960	0	NA	NA	NA	NA	NA
FBgn0011961	0	NA	NA	NA	NA	NA
FBgn0011962	0	NA	NA	NA	NA	NA
FBgn0011963	0	NA	NA	NA	NA	NA
FBgn0011965	0.162805803333611	0	3.81693625648277	0	1	1
FBgn0011966	0	NA	NA	NA	NA	NA
FBgn0011970	0	NA	NA	NA	NA	NA
FBgn0011971	0.156774215368837	1.44309047918407	3.77680094588621	0.382093337684614	0.702392133356558	0.931580966222199
FBgn0011974	0	NA	NA	NA	NA	NA
FBgn0011975	0.162805803333611	0	3.81693625648277	0	1	1
FBgn0011976	0	NA	NA	NA	NA	NA
FBgn0011977	0	NA	NA	NA	NA	NA
FBgn0011980	0.0783871076844186	0.603499852806475	3.81693625648277	0.158111064019337	0.874369282450895	0.970151593571103
FBgn0011981	0.634957025482322	0.799730099557108	2.3533267732945	0.339829601495392	0.733984854383227	0.94354314395984
FBgn0011982	1.03271568421269	0.637755052822095	1.93141089856089	0.33020164341896	0.741247605148673	0.944594622404397
FBgn0011983	0.116567900292774	-1.07961083128251	3.81693625648277	-0.282847487811429	0.777293750023285	0.947820762446549
FBgn0011984	0	NA	NA	NA	NA	NA
FBgn0011985	0	NA	NA	NA	NA	NA
FBgn0011986	0	NA	NA	NA	NA	NA
FBgn0011987	28.441636326728	-0.83828830477012	1.14468057688187	-0.732333824562338	0.463964838903101	0.872738829151699
FBgn0011993	0	NA	NA	NA	NA	NA
FBgn0011994	0.119183042899089	-1.07961083128251	3.81693625648277	-0.282847487811429	0.777293750023285	0.947820762446549
FBgn0011998	0	NA	NA	NA	NA	NA
FBgn0011999	0.162805803333611	0	3.81693625648277	0	1	1
FBgn0012000	0	NA	NA	NA	NA	NA
FBgn0012001	0	NA	NA	NA	NA	NA
FBgn0012002	0	NA	NA	NA	NA	NA
FBgn0012003	0	NA	NA	NA	NA	NA
FBgn0012004	0	NA	NA	NA	NA	NA
FBgn0012009	0	NA	NA	NA	NA	NA
FBgn0012010	0	NA	NA	NA	NA	NA
FBgn0012011	0	NA	NA	NA	NA	NA
FBgn0012016	0	NA	NA	NA	NA	NA
FBgn0012017	0.488417410000832	0	3.81693625646927	0	1	1
FBgn0012018	0	NA	NA	NA	NA	NA
FBgn0012024	0	NA	NA	NA	NA	NA
FBgn0012025	0.162805803333611	0	3.81693625648277	0	1	1
FBgn0012026	0.675694072999487	-1.07962790870443	3.25903479378921	-0.331272286740202	0.740438822579202	0.944522273052594
FBgn0012027	0.561417148623598	0.709038606625989	2.77329983864553	0.255666046903995	0.798208714624322	0.951967907198609
FBgn0012028	0	NA	NA	NA	NA	NA
FBgn0012034	10743.3157996835	-0.00494384420272798	0.295618524959105	-0.0167237293515753	0.986657016522114	1
FBgn0012036	17887.5738673059	0.0371538819333694	0.121258808071139	0.306401510326344	0.759298958551258	0.947820762446549
FBgn0012037	4223.93646737916	-0.0683312468195076	0.109492827554795	-0.624070529051886	0.532581267406732	0.884557653211185
FBgn0012042	326.458198390826	1.20367965598132	0.410295944971293	2.93368645421425	0.00334962397845541	0.862280468618376
FBgn0012051	1194.34859168471	-0.248037518154114	0.25774069872155	-0.962352936049423	0.335872346387823	0.862280468618376
FBgn0012058	1708.57984826792	-0.0676019618653134	0.232370150930032	-0.290923604407645	0.771109748034963	0.947820762446549
FBgn0012344	389.058626466934	0.299793920850789	0.167509677107342	1.78971105447644	0.073500374356772	0.862280468618376
FBgn0013263	452.660688105941	-0.312160359457486	0.267608910641165	-1.16647969123891	0.243420554969006	0.862280468618376
FBgn0013269	1071.11821486777	-0.296318141092086	0.383659977201641	-0.772345719387742	0.43990969369598	0.868007272674969
FBgn0013272	11969.341212669	-0.42233959203893	0.317196550618054	-1.33147599245958	0.183032439338767	0.862280468618376
FBgn0013275	128.809897544619	-1.16767748682181	0.767402337519899	-1.52159751115109	0.128109961563032	0.862280468618376
FBgn0013276	439.050009676438	-1.71644724745809	0.941191046249914	-1.82369695748499	0.0681978990874234	0.862280468618376
FBgn0013277	320.099619472197	-2.12234378803906	1.74985112456968	-1.21287105985144	0.225179121824312	0.862280468618376
FBgn0013278	1448.81776525051	-1.94253982066461	1.40239135886561	-1.3851624287217	0.166002806215139	0.862280468618376
FBgn0013279	673.510736459948	-1.58412851440073	0.655098118845215	-2.4181545768948	0.0155994484949919	0.862280468618376
FBgn0013300	3336.87280929085	0.198125591624805	0.317630337223117	0.623761550476941	0.532784194135191	0.884594003316209
FBgn0013301	6708.89170604639	0.227546881049565	0.349292890907027	0.651450078066811	0.514755992960849	0.880871907382998
FBgn0013303	1126.67652273255	-0.076074528051842	0.20875380726198	-0.364422230423662	0.71554273763083	0.936766149142567
FBgn0013305	3717.49556479362	-0.129039667173791	0.152091648251428	-0.848433616555135	0.39619652773743	0.862280468618376
FBgn0013307	592.839768165283	-0.325640334551865	0.312217252242722	-1.04299276293261	0.296951644581441	0.862280468618376
FBgn0013308	115.927050410623	0.285837542357221	0.416290411604284	0.686630137013416	0.492315832215261	0.878396178577716
FBgn0013323	113.570031684516	0.376517991093431	0.345590732797117	1.08949099429258	0.275937424060336	0.862280468618376
FBgn0013325	15399.0894541054	0.20725023080233	0.218888795660113	0.946828868866107	0.34372598861154	0.862280468618376
FBgn0013334	5961.01076564646	-0.468826646861126	0.303504871407407	-1.54470880380632	0.122416714430691	0.862280468618376
FBgn0013342	5003.68472967215	-0.139069055352327	0.181982434254387	-0.764189444558845	0.444754355895539	0.868898993853825
FBgn0013343	380.467767977744	-0.984371834286058	0.669806465906843	-1.46963620745782	0.141660308492849	0.862280468618376
FBgn0013347	971.706374876653	0.303114366405045	0.264673258851004	1.14523986186183	0.252109810054911	0.862280468618376
FBgn0013348	3713.9154733715	-0.406968999155883	0.244894055753678	-1.66181656759046	0.0965495593050998	0.862280468618376
FBgn0013432	534.03045329618	0.0821922361643841	0.13917057404335	0.59058631272716	0.554797637979185	0.888034947207624
FBgn0013433	116.203220325274	0.0110050067600341	0.271680347881839	0.0405071873833893	0.967688777042789	0.999335904544736
FBgn0013435	189.755548471267	0.206106036710402	0.27985376345553	0.736477630907947	0.461440075885503	0.871330352614604
FBgn0013467	1659.43249567405	-0.311312563132511	0.26004225738562	-1.19716143930739	0.231243636466209	0.862280468618376
FBgn0013469	262.817703128077	-0.571013467528091	0.367969535102028	-1.55179549679232	0.120711163801069	0.862280468618376
FBgn0013531	187.28761348275	0.162080760306816	0.20058405637888	0.808044085022708	0.419065204236461	0.864415509334833
FBgn0013548	145.681836834682	-0.449592523845653	0.491387060967836	-0.914945792345723	0.360220088518315	0.862280468618376
FBgn0013563	316.981949063361	-0.217163907568387	0.335833549032004	-0.646641493068019	0.517863997011142	0.88113034369938
FBgn0013576	9167.48022260065	-0.320162271776973	0.343297083723873	-0.932609937445584	0.351021400625244	0.862280468618376
FBgn0013672	130514.301314004	-1.02501630967015	0.561938750809909	-1.82407123230568	0.0681413039875166	0.862280468618376
FBgn0013673	281.22675487931	-2.33906669245573	0.962073497586507	-2.43127650675713	0.0150457274296535	0.862280468618376
FBgn0013674	303000.865493559	-0.585033305048676	0.340317624561788	-1.71908024393975	0.0855997615721503	0.862280468618376
FBgn0013675	132522.178174268	-0.377061666459571	0.329704595013202	-1.14363485423815	0.252775100718233	0.862280468618376
FBgn0013676	185087.749688289	-0.561784680919673	0.321924629267154	-1.74508139435789	0.0809707017400854	0.862280468618376
FBgn0013678	148514.283107608	-0.774899265962041	0.429639497988736	-1.80360341539724	0.0712935002816468	0.862280468618376
FBgn0013679	48071.7854770061	-0.696984956293249	0.427848855521436	-1.6290448070588	0.103303533895784	0.862280468618376
FBgn0013680	6172.22573298754	-0.78111248303153	0.549168024989921	-1.42235608682036	0.154922904378561	0.862280468618376
FBgn0013681	5999.26930297516	-0.120952603910027	0.456134096202782	-0.265168959998674	0.790879305552351	0.95004556916597
FBgn0013683	536.896669659683	-1.75170346506825	0.733310995494021	-2.38875930653154	0.0169053737032242	0.862280468618376
FBgn0013684	55096.0107499419	-1.06444938259803	0.595314314345159	-1.78804600687104	0.0737685855478485	0.862280468618376
FBgn0013685	2027.53688760576	-1.34534782672242	1.07367127896785	-1.25303512637102	0.210192923464868	0.862280468618376
FBgn0013686	3239419.59045141	0.233755405371731	0.481400251256177	0.485573916427679	0.627269293607896	0.907500711149188
FBgn0013688	19696.636876633	-2.24101356190217	0.950226379325566	-2.35839965155751	0.018353921319044	0.862280468618376
FBgn0013689	5.1823575394734	0.550169118050875	0.829049204175176	0.663614554214837	0.506937039733975	0.880871907382998
FBgn0013690	3.37827749381051	-0.144622487593319	1.04361030833441	-0.138579014061421	0.88978282763162	0.974303405117648
FBgn0013691	0.502742791515894	3.11392097681805	3.67717313553217	0.846824683539791	0.397092847783864	0.862280468618376
FBgn0013692	0.235750943191864	-1.92154272753486	3.80448570173753	-0.505072926586971	0.613507615930132	0.902338086698664
FBgn0013693	0	NA	NA	NA	NA	NA
FBgn0013694	12.7474436269656	-1.34077736562918	0.832619861098254	-1.61031153383808	0.107329862544231	0.862280468618376
FBgn0013695	1.72642556651153	-4.82633071385767	2.1262815625395	-2.26984553639895	0.0232169565989448	0.862280468618376
FBgn0013696	2.22029851629124	0.0814164976492217	1.7334834988708	0.0469669873997974	0.962539538717838	0.998545712342695
FBgn0013697	0.327841013598927	-2.43488446324127	3.76860867736232	-0.646096390391339	0.518216932895679	0.88113034369938
FBgn0013698	1.40689235485146	0.427772562702884	1.74951264678735	0.244509557269224	0.806836200939741	0.955935200599579
FBgn0013699	10.2641904398833	-2.09067790481041	0.813284482505971	-2.57066002091717	0.0101504920204407	0.862280468618376
FBgn0013700	0.349703700878323	-2.51890861222392	3.76355244007394	-0.669290159319378	0.503310402948501	0.880871907382998
FBgn0013701	0	NA	NA	NA	NA	NA
FBgn0013702	7.34478186794755	-2.79795570247669	1.20076470503994	-2.33014485746699	0.019798496262752	0.862280468618376
FBgn0013703	2.5011163995485	-0.414781153554755	1.29998505227995	-0.319066094511855	0.749676393624506	0.94713873078807
FBgn0013704	0.90183041431801	-0.601561787398824	2.30650138905645	-0.260811370091961	0.794237975773981	0.95051466712929
FBgn0013705	0	NA	NA	NA	NA	NA
FBgn0013706	0	NA	NA	NA	NA	NA
FBgn0013707	8.42087938562257	-1.62741943415228	1.27145679470989	-1.27996440061781	0.200557656313897	0.862280468618376
FBgn0013708	0	NA	NA	NA	NA	NA
FBgn0013709	133.55059265771	-0.284800666171447	0.47322896518998	-0.601824248135597	0.547291132569252	0.885635692926836
FBgn0013710	1.08145506608341	0.0228935927168427	1.82207493887396	0.0125645725257551	0.989975185336353	1
FBgn0013717	322.115609417602	-0.0674223036412541	0.248062182099492	-0.27179597901873	0.785778897155491	0.949326006325744
FBgn0013718	2942.74259676304	-0.401853409158078	0.288989704508995	-1.39054576300856	0.164363212940027	0.862280468618376
FBgn0013720	488.418828011852	-0.124953234932394	0.195482826022618	-0.639203133465731	0.522690793937468	0.881876796477609
FBgn0013725	403.05685497258	0.366018107383116	0.304866814493624	1.20058363187565	0.229912753468582	0.862280468618376
FBgn0013726	921.525076043148	-0.309317927327228	0.374757234231258	-0.825382138284091	0.409154672339515	0.863505398638206
FBgn0013732	215.522649841623	-0.554975449624408	0.586988773660174	-0.945461778023204	0.344423175453921	0.862280468618376
FBgn0013733	20289.8872497857	-0.421436676882769	0.563960071357789	-0.747281054611045	0.454893925989604	0.871330352614604
FBgn0013746	989.744632475556	-0.123894114681167	0.157969976665442	-0.784288997798341	0.432870553770647	0.865736188882361
FBgn0013749	2377.3564699425	-0.028352380809679	0.164280760054496	-0.172584913779763	0.862977711007311	0.970151593571103
FBgn0013750	1590.64998772336	-0.299168514121476	0.289859195903459	-1.03211669096439	0.302017455679414	0.862280468618376
FBgn0013751	86.6995348081708	0.0525308039113688	0.243413130067373	0.215809245363342	0.829136441374156	0.963500093570367
FBgn0013753	272.939022289056	0.0220758115392702	0.221803354003081	0.0995287543711517	0.920718458553173	0.986384816695506
FBgn0013755	10.1199848384481	0.0739084351245181	0.632298831314007	0.116888457584092	0.906948444963286	0.981444556459959
FBgn0013756	1471.44457169743	-0.372631966397317	0.360784397084841	-1.03283836387661	0.30167954698215	0.862280468618376
FBgn0013759	1657.69221283851	-0.309299774554022	0.493097850207008	-0.627258412147151	0.530489859529214	0.884323471079562
FBgn0013762	414.426233475216	-0.201842548542862	0.156054261981254	-1.29341259879918	0.195868394977062	0.862280468618376
FBgn0013763	6472.13989871524	-0.152284818963445	0.184457894714629	-0.8255803808183	0.409042168180134	0.863505398638206
FBgn0013764	819.259968709614	0.0417299878637469	0.157523851296639	0.264912186441934	0.791077110213999	0.95004556916597
FBgn0013765	4954.08150173906	0.0980987397252223	0.132808362587287	0.738648815587555	0.460120273843026	0.871330352614604
FBgn0013767	106.766614141311	0.834607064835852	0.424321327345962	1.96692226161748	0.0491921736397177	0.862280468618376
FBgn0013770	10186.6497311883	-0.290303810016709	0.265368760799599	-1.09396377004579	0.273970868317754	0.862280468618376
FBgn0013771	1025.98333645866	-0.0572745943132574	0.145230253070761	-0.394370959922182	0.69330718072759	0.929342389534528
FBgn0013772	478.887667062843	0.00186416029939422	0.42336453423797	0.00440320373729365	0.996486763072506	1
FBgn0013773	382.053211312654	-0.238283340493381	0.2950444889458	-0.807618340355289	0.419310325442063	0.864415509334833
FBgn0013799	818.642406122644	-0.170099764871397	0.204886467211271	-0.830214738858258	0.406417383495539	0.863505398638206
FBgn0013809	1730.22414775695	0.0416679531333523	0.424931603552578	0.0980580234206952	0.921886219288671	0.986884419337276
FBgn0013810	2773.2677958005	0.0107881835401892	0.389137531774126	0.0277233180027752	0.97788282577264	0.999899932701056
FBgn0013811	1239.30689210297	0.130986847837443	0.400060280221924	0.327417777552875	0.743351922271985	0.945137064854149
FBgn0013812	533.430326387847	-0.0980623501342643	0.461207926464497	-0.212620695585146	0.831622827782635	0.96394780209328
FBgn0013813	2445.57190253356	-0.0206753476422541	0.391899529778533	-0.0527567554213141	0.957925717660722	0.997480729525546
FBgn0013949	651.209882717493	0.0783286311976943	0.28262895716794	0.277142979199937	0.781670321189378	0.948741009587333
FBgn0013953	230.62875014139	-0.218320778503558	0.236872242584267	-0.92168156184822	0.356694700860894	0.862280468618376
FBgn0013954	4214.21674940763	0.0767855640442419	0.180230653987643	0.426040533867822	0.670078310304254	0.922360365085808
FBgn0013972	782.505501478904	0.291867632258831	0.355626782338249	0.820713306067106	0.411809589778225	0.863505398638206
FBgn0013973	485.543851774697	-0.168258817196631	0.227823642753219	-0.738548533256888	0.460181186084311	0.871330352614604
FBgn0013981	7827.28675408564	0.12505805195606	0.198892101428887	0.628773345233993	0.529497452666198	0.884233341148626
FBgn0013983	481.312934820637	-0.00982475356487593	0.157958989266288	-0.0621981288340186	0.950405052580906	0.995851162964638
FBgn0013984	761.847415766093	-0.563279556225169	0.454097259242283	-1.24043813249406	0.214813384102792	0.862280468618376
FBgn0013987	1355.80532186252	-0.387910423708925	0.276487475582521	-1.40299455840324	0.160618461626955	0.862280468618376
FBgn0013995	5032.72442576564	-0.24365348398714	0.267164735280626	-0.911997175567388	0.361770204388451	0.862280468618376
FBgn0013997	1245.64472881613	-0.302155228378894	0.339244809169179	-0.890670159755374	0.373106147893631	0.862280468618376
FBgn0014000	1202.0731737369	-0.166726191233317	0.187179358613396	-0.890729578669392	0.373074262497216	0.862280468618376
FBgn0014002	17522.1664998468	0.200363526720797	0.212416664369699	0.943257099509276	0.345549413538606	0.862280468618376
FBgn0014006	1121.05104381819	-0.247471387719223	0.199733116733508	-1.23901029416874	0.215341685817214	0.862280468618376
FBgn0014007	746.622010228717	-0.651535989994322	0.513653013423296	-1.26843603165509	0.204642281086157	0.862280468618376
FBgn0014009	2479.06327036699	-0.302047796179574	0.223561826356114	-1.35107053428003	0.176672839259594	0.862280468618376
FBgn0014010	4122.71093236567	-0.288095907615365	0.235360041050717	-1.22406465570459	0.22092783791629	0.862280468618376
FBgn0014011	1156.18974631358	-0.54835193168097	0.351186323363051	-1.56142735408888	0.118422951962299	0.862280468618376
FBgn0014018	2581.93104807295	-0.0772773209773333	0.101369160826169	-0.762335609247575	0.445859726181684	0.868898993853825
FBgn0014019	1572.90979772735	0.33550717050614	0.336033893743523	0.998432529434707	0.318069666352716	0.862280468618376
FBgn0014020	6945.62991710729	-0.303980510110242	0.225944106580467	-1.34537923874541	0.17850279629213	0.862280468618376
FBgn0014022	196.010952476089	-0.127472513681938	0.170465496966534	-0.747790702226169	0.454586411184126	0.871330352614604
FBgn0014023	464.962583499502	0.11570889275264	0.140487603097674	0.823623509842312	0.410153513375082	0.863505398638206
FBgn0014024	627.558761839469	-0.113902293687815	0.155757213188745	-0.731281019709755	0.464607521352333	0.872738829151699
FBgn0014026	30036.675495718	0.285467481574372	0.323004859387649	0.883786956380658	0.376811228892169	0.862280468618376
FBgn0014028	5097.09201442604	0.116867205451729	0.246621587856437	0.473872569175736	0.635590781277574	0.909143540896539
FBgn0014029	690.285544185642	-0.0275284662233528	0.155428123951106	-0.177113803625479	0.859418999610907	0.970151593571103
FBgn0014031	1871.05892722422	-0.00659843134639937	0.190577460993095	-0.0346233563613194	0.972380076980196	0.999335904544736
FBgn0014032	358.802347224883	0.0350568613050043	0.162133239779139	0.216222542353186	0.828814282878932	0.963194278352113
FBgn0014033	238.3988969485	-0.355431795491184	0.358007118211478	-0.992806504146732	0.32080425967134	0.862280468618376
FBgn0014037	3487.24515936549	-0.286667681286632	0.329703201226422	-0.869471937852869	0.384589050574719	0.862280468618376
FBgn0014073	683.258513607208	-0.267246663155182	0.154817552215703	-1.72620390472802	0.0843107358249613	0.862280468618376
FBgn0014075	2135.83356508469	-0.214200042391679	0.169915978272001	-1.26062330670744	0.207444597418351	0.862280468618376
FBgn0014076	2.45013252870273	0.482698074522281	1.55961411707423	0.309498400429845	0.756942428750097	0.947820762446549
FBgn0014092	290.687426871282	-0.183785844665208	0.154241289947296	-1.19154763765272	0.233438667033743	0.862280468618376
FBgn0014127	805.290459668613	0.130575926594649	0.215971697580532	0.604597398906676	0.545446535374604	0.885297275953961
FBgn0014133	2090.72535508772	-0.215865621439621	0.320945916353554	-0.672591893027307	0.501206960710219	0.880871907382998
FBgn0014135	284.252076981229	-0.550306351739593	0.31935742066814	-1.72316757377447	0.0848582257712444	0.862280468618376
FBgn0014141	3591.66697610464	-0.190124295732656	0.294306199560401	-0.646008463350892	0.518273874380747	0.88113034369938
FBgn0014143	60.0602332527384	-0.0170641853950132	0.250429147974479	-0.0681397733971132	0.945674369322937	0.994587510615454
FBgn0014163	2502.16440585141	-0.583167227200837	0.382470987427569	-1.52473585283714	0.127324995384298	0.862280468618376
FBgn0014179	7.36690600195479	0.816725025601663	0.737073820759207	1.10806408069196	0.267834142151352	0.862280468618376
FBgn0014184	28941.6442360792	-0.406759410794868	0.3804347890586	-1.06919614739075	0.284981294358981	0.862280468618376
FBgn0014189	1358.77982248402	-0.141455326358101	0.214532468042923	-0.659365585305245	0.509661035985165	0.880871907382998
FBgn0014269	388.957898477172	-0.115134636580881	0.190704579523496	-0.603732940596192	0.546021209953894	0.885297275953961
FBgn0014340	278.33791537867	-0.272576805969782	0.288275729500457	-0.945541986632454	0.344382245891524	0.862280468618376
FBgn0014342	393.033480663472	-0.00813240023326764	0.182145867846779	-0.0446477338706834	0.964388094444255	0.9991912582249
FBgn0014343	315.222164921357	-0.472778324834868	0.424475048005693	-1.113795326854	0.265367002233215	0.862280468618376
FBgn0014366	516.523270981977	0.03773118413976	0.112191224149733	0.336311368609392	0.736636077817189	0.943723909223827
FBgn0014368	8.21759981781923	0.76584907783406	0.626068755255954	1.22326672814228	0.221228969588122	0.862280468618376
FBgn0014380	961.823473818849	-0.229641240208821	0.152804583939436	-1.50284261301899	0.132879634330547	0.862280468618376
FBgn0014388	999.518194373245	-0.722706643867107	0.430453282052035	-1.67894327677525	0.0931630991649844	0.862280468618376
FBgn0014391	3379.81706380061	0.105643498335232	0.29904777604568	0.35326628986231	0.723888815145467	0.939429434989248
FBgn0014395	484.189954698455	0.20463165241231	0.231858678240267	0.882570598458503	0.377468319959967	0.862280468618376
FBgn0014396	4619.99464114771	-0.702670617675931	0.452809084154559	-1.55180327043988	0.120709303185323	0.862280468618376
FBgn0014411	1105.69748991569	-0.211142878892954	0.210129400976119	-1.00482311333934	0.314982032207971	0.862280468618376
FBgn0014417	448.562185015934	-0.193931501923357	0.244954099848262	-0.791705474795029	0.428532429311053	0.865018364870926
FBgn0014427	1200.78552494766	0.0602006157648552	0.213772363793355	0.281610843874322	0.778241924397847	0.947820762446549
FBgn0014454	245.768089230989	-2.46501134128305	1.14223213739203	-2.15806512580816	0.0309227687066143	0.862280468618376
FBgn0014455	1813.90310842391	0.173248593860651	0.244041232618298	0.709915254901318	0.47775668993982	0.874767111949558
FBgn0014464	16.4438885076808	-0.163127281675336	0.764476706655518	-0.213384240821405	0.831027271456937	0.96394780209328
FBgn0014465	56.4296894393776	-0.281627078619607	0.679914574203989	-0.414209504112075	0.678720682018449	0.92544060926908
FBgn0014466	1.97796257553465	0.149941580558573	1.26739001798109	0.118307370605163	0.905824117518203	0.981113694972531
FBgn0014469	2794.73229465159	-0.229231147083946	0.180607316195256	-1.26922403761386	0.204361170120639	0.862280468618376
FBgn0014848	0.0864921440367641	0.603499852806475	3.81693625648277	0.158111064019337	0.874369282450895	0.970151593571103
FBgn0014849	0.194955007977193	-0.117828150054015	3.81693625648277	-0.0308698238944632	0.975373355492518	0.999335904544736
FBgn0014850	1.05092470940849	1.09529102043941	1.52572252612589	0.717883495644896	0.472829125070342	0.874159905574421
FBgn0014851	0.116567900292774	-1.07961083128251	3.81693625648277	-0.282847487811429	0.777293750023285	0.947820762446549
FBgn0014857	2723.48110939236	0.0385214944173436	0.19502196495053	0.197523875975278	0.843417599151257	0.966504068605401
FBgn0014859	264.007124012226	-0.0144885181108885	0.19249511081429	-0.0752669408048828	0.940002324262941	0.992072778137503
FBgn0014861	147.502112036907	-1.20320465822616	0.603950066878874	-1.9922253911555	0.0463463335113386	0.862280468618376
FBgn0014863	10746.4899712639	-0.229509278991172	0.163254449723166	-1.40583781563293	0.159772290050976	0.862280468618376
FBgn0014865	512.290790517802	1.29134638957653	0.724342668782709	1.78278381935817	0.0746215006907202	0.862280468618376
FBgn0014868	1717.2962992073	0.151705043090512	0.196057925169083	0.773776642590091	0.439062887438118	0.867489664718233
FBgn0014869	5069.71245976035	-0.094548803974204	0.171513682277305	-0.551260999815376	0.581454769387873	0.894305198646305
FBgn0014870	1875.79272560548	-0.178357656326627	0.26851987550959	-0.664225156473592	0.506546214834973	0.880871907382998
FBgn0014877	2724.98886553114	0.333186226411601	0.193275221695461	1.72389519716394	0.0847267645300172	0.862280468618376
FBgn0014879	860.627408917196	-0.225060246383234	0.305562686698512	-0.736543616679524	0.461399933858741	0.871330352614604
FBgn0014903	0	NA	NA	NA	NA	NA
FBgn0014906	2407.14166385329	-0.0578726501078256	0.156768171797337	-0.369160713200386	0.712007937205663	0.935020632769269
FBgn0014930	785.912988731161	0.0193816098686483	0.137029572537171	0.141441073702472	0.887521508281014	0.973626121151061
FBgn0014931	49.1641343412991	-0.889664988899575	0.619604543744863	-1.43585936849733	0.151042362276581	0.862280468618376
FBgn0014949	0.873715560695993	1.31697517962877	2.021271192582	0.651557883208364	0.514686424919816	0.880871907382998
FBgn0015000	759.883125365581	-0.229508592500691	0.205640862181831	-1.11606511500499	0.264394263254933	0.862280468618376
FBgn0015001	290.900364627779	-0.116582105682084	0.264135584096487	-0.441372206932548	0.65894355960856	0.91956758068858
FBgn0015008	2034.0908913626	0.0705826033362317	0.130554847748418	0.540635637462087	0.588758749205676	0.896340592730096
FBgn0015010	5471.99771037125	0.178891514596796	0.196573807686279	0.910047562808043	0.362797426838969	0.862280468618376
FBgn0015011	648.428849579146	0.057848488213679	0.190221099377024	0.304111838293088	0.761042688070103	0.947820762446549
FBgn0015019	1507.02274764675	-0.219215407496149	0.202007277561485	-1.0851856930225	0.277839419503342	0.862280468618376
FBgn0015024	3508.27834720897	-0.530771006808291	0.416254434007259	-1.27511195904531	0.202269617083199	0.862280468618376
FBgn0015025	121.895746895291	0.260787092481697	0.205681218017289	1.26791884546199	0.204826933386183	0.862280468618376
FBgn0015031	6264.68709475469	0.443714253179863	0.440537330515493	1.00721147209171	0.313833161267552	0.862280468618376
FBgn0015032	62.857551906993	0.328816904567524	0.430799336787611	0.763271612763961	0.445301428002528	0.868898993853825
FBgn0015033	379.823416435634	-0.134316849067178	0.223465639826704	-0.60106264735527	0.547798260869658	0.885635692926836
FBgn0015034	550.557414519889	-0.514863928286737	0.2409145081631	-2.13712296620249	0.0325879914479997	0.862280468618376
FBgn0015035	503.762067328704	-0.915062591564064	0.470935084576536	-1.94307585383426	0.0520069939868477	0.862280468618376
FBgn0015036	199.394289396529	-0.209485523096121	0.26687750749257	-0.784950088391967	0.432482832924294	0.865736188882361
FBgn0015037	812.37466172682	-0.0635017130336862	0.268977198476582	-0.236085859297158	0.813366046473105	0.958149609990497
FBgn0015038	196.017482780494	-0.244602614357178	0.242282554671069	-1.00957584292133	0.312698548158665	0.862280468618376
FBgn0015039	3374.20396553648	-0.064291517028013	0.169216593375953	-0.379936244698974	0.703992741779543	0.93180881061741
FBgn0015040	960.863178892889	0.502744802493739	0.367210336042918	1.36909218817572	0.170970459885773	0.862280468618376
FBgn0015075	736.356071117195	0.0559821469933874	0.169464021581776	0.33034827375658	0.741136821124037	0.944577415325296
FBgn0015218	5077.20697668963	-0.0470062446269562	0.152262872506278	-0.308717705460458	0.75753627428279	0.947820762446549
FBgn0015221	16050.847804294	-0.0103687126672439	0.141147398072331	-0.0734601757372136	0.941439933574312	0.992571870136273
FBgn0015222	20750.9816902151	-0.0291812267160617	0.0736334924697015	-0.396303716383807	0.691880985935501	0.929200127588175
FBgn0015229	683.401863464371	-0.497865598346419	0.303393190263513	-1.64099134167776	0.100799212514386	0.862280468618376
FBgn0015230	1021.87270651539	0.261992035405943	0.219887978463144	1.19147957626913	0.233465369777094	0.862280468618376
FBgn0015239	1145.07377175027	0.00701601957785185	0.118647017499914	0.0591335519905247	0.952845734766254	0.996688852387334
FBgn0015240	645.940674709	-0.180223270485621	0.205763935464265	-0.875873947876161	0.381098563760679	0.862280468618376
FBgn0015245	6949.80642865372	0.103633199951477	0.171407280339246	0.604602090100071	0.54544341758208	0.885297275953961
FBgn0015247	2086.76334116013	0.00352351077609478	0.138267411469795	0.0254833061430713	0.979669463931975	1
FBgn0015268	5225.32093081345	-0.165267440182566	0.186325409328011	-0.886982837062367	0.37508814087262	0.862280468618376
FBgn0015269	1603.3780949995	-0.405659084860573	0.316312256390783	-1.28246401037147	0.199679922131449	0.862280468618376
FBgn0015270	54.8154993390806	-0.558227565672095	0.626826632981503	-0.890561339132774	0.373164547625765	0.862280468618376
FBgn0015271	173.693467732214	0.524937619627425	0.294735798402259	1.78104465922726	0.0749051553006147	0.862280468618376
FBgn0015277	521.185390734882	0.0228267743349139	0.249355933019047	0.0915429364705364	0.927061191067604	0.988144395427522
FBgn0015278	2114.11158575363	-0.122243207641441	0.234891540767563	-0.520424052913882	0.602768049155829	0.901194794138944
FBgn0015279	858.419999967644	-0.309822727627807	0.287814127332465	-1.07646810286668	0.281717958865484	0.862280468618376
FBgn0015282	2930.2033512657	0.0751252384250559	0.146812273945136	0.511709521324697	0.608854321448386	0.901676720310392
FBgn0015283	2987.42038700116	0.0849325963196117	0.110882143316182	0.765971812769032	0.443693074179778	0.868898993853825
FBgn0015286	1411.94495938094	-0.227465795652765	0.209466131220296	-1.08593114470395	0.277509456535467	0.862280468618376
FBgn0015288	4403.39107436388	-0.131555355981602	0.229630320878456	-0.572900632104392	0.566711976580501	0.890378408134289
FBgn0015295	307.464795788095	-0.289840393228798	0.289981955130965	-0.999511825133729	0.31754681358026	0.862280468618376
FBgn0015296	482.749849545816	0.0406843741494955	0.124890979255785	0.325759109200123	0.744606618661455	0.945937998698117
FBgn0015298	626.88199491865	0.243990520250596	0.346918059323953	0.703308789188047	0.481863334494318	0.87636988870685
FBgn0015299	562.985602051337	0.0843565298752275	0.116456330854824	0.724361906785367	0.468843579858861	0.873720776466731
FBgn0015300	877.560606658853	0.579550125490631	0.351122124378309	1.65056567288881	0.0988272930595506	0.862280468618376
FBgn0015316	174.84884282538	0.454647196555825	0.355526685878186	1.27879907364141	0.200967820224511	0.862280468618376
FBgn0015320	2965.85221781173	0.0589089906654942	0.111053544897327	0.530455742947762	0.595795986221016	0.89992502088346
FBgn0015321	3027.85289885674	0.177572545201875	0.158543663200755	1.1200229742202	0.262703972016425	0.862280468618376
FBgn0015323	1302.87501318607	-0.442563824003486	0.284030743823835	-1.55815464919522	0.119196592550187	0.862280468618376
FBgn0015324	13435.9733315445	-0.348037895926624	0.298619622095426	-1.16548903747325	0.243821095109575	0.862280468618376
FBgn0015331	504.040589841678	0.00993654017390004	0.175525390087633	0.0566102725590817	0.954855651350851	0.996806553116626
FBgn0015336	227.944401638673	-0.368818866248727	0.371901172895371	-0.991712027626459	0.321338022119036	0.862280468618376
FBgn0015338	619.580125257706	0.104130770953864	0.127826052763665	0.814628698160532	0.415284878255341	0.863658987555832
FBgn0015351	119.064614468142	0.275115293300917	0.216742994552283	1.26931573437569	0.204328476737996	0.862280468618376
FBgn0015359	1166.7059907335	0.301730681897952	0.262685479081056	1.14863860367724	0.250705032022572	0.862280468618376
FBgn0015360	646.362173259106	-0.0951209163161702	0.164071055248486	-0.579754400751001	0.56208025187423	0.889825455846315
FBgn0015371	1629.41051960165	-0.174203945763153	0.316149459686257	-0.551017692505409	0.581621546231083	0.894305198646305
FBgn0015372	534.518255583765	-0.156548108832813	0.181351212096208	-0.863231665359717	0.388010106901161	0.862280468618376
FBgn0015376	75.4434198492436	-0.364559304312285	0.523811059677798	-0.695974813010878	0.486444603337262	0.877334535643033
FBgn0015379	679.063794616628	0.359080054841923	0.293720295179728	1.22252381171754	0.221509604840804	0.862280468618376
FBgn0015380	236.556455215407	-0.227529025421794	0.19882028359643	-1.14439543745767	0.252459679526932	0.862280468618376
FBgn0015381	21.0398813393112	0.576029668719902	0.432922534844502	1.33056060231838	0.183333633219229	0.862280468618376
FBgn0015391	331.860885825651	-0.57606802216033	0.453707278864543	-1.26969094170587	0.204194740693251	0.862280468618376
FBgn0015393	449.483946080744	-0.281058324512798	0.510845751614221	-0.550182366447567	0.582194296945071	0.894305198646305
FBgn0015396	251.928509945403	-0.669815830954474	0.556723653446319	-1.20313880469794	0.228922611123777	0.862280468618376
FBgn0015399	424.825267744293	-0.286467915068342	0.304410510105507	-0.941057898983362	0.346675189053829	0.862280468618376
FBgn0015400	359.423947589695	-0.317672345208325	0.304585035731551	-1.04296767057298	0.296963266213378	0.862280468618376
FBgn0015402	704.215922314526	-0.143505623094003	0.217126211705312	-0.660931823785383	0.508656036222083	0.880871907382998
FBgn0015477	1286.65506541915	-0.28628066488942	0.345889546198681	-0.827664981597848	0.40786025622786	0.863505398638206
FBgn0015509	2937.21834636436	-0.176537105607425	0.239572573707601	-0.736883621006174	0.461193125303787	0.871330352614604
FBgn0015513	1673.00221231922	-0.567495749781012	0.449113255841434	-1.26359162727848	0.206376640325509	0.862280468618376
FBgn0015519	250.02313019915	-0.337637621355866	0.333591452300223	-1.0121291149031	0.311476323177239	0.862280468618376
FBgn0015520	914.488226374244	-0.0595358654114588	0.229694740531106	-0.259195597051106	0.795484328099195	0.951097978879298
FBgn0015521	8578.78939294391	0.279573170170889	0.316724118535256	0.882702496620157	0.377397032878039	0.862280468618376
FBgn0015522	766.241684627846	-0.407805821443023	0.335414163632702	-1.2158276711582	0.224050575446601	0.862280468618376
FBgn0015524	127.370176524292	-0.157447858147456	0.201056045092009	-0.783104323351249	0.433565852572941	0.865755161651119
FBgn0015527	447.99948415897	-0.148038824318331	0.196379648758434	-0.753839948560217	0.45094533298212	0.871108747421259
FBgn0015541	1526.72324073928	-0.304564950541933	0.21879844893778	-1.39198861792911	0.163925844678284	0.862280468618376
FBgn0015543	25.7401516214695	-0.605687226425619	0.637286111837649	-0.950416485115432	0.341900670852232	0.862280468618376
FBgn0015544	630.277769270165	0.0424181468710149	0.160506122801494	0.264277437711679	0.791566144521084	0.95004556916597
FBgn0015546	249.149336660527	-0.499822020753687	0.47444682760489	-1.05348374501079	0.29211934035057	0.862280468618376
FBgn0015550	7.8350419899985	-0.871599701269096	0.782559923381769	-1.11378014031507	0.265373518857724	0.862280468618376
FBgn0015553	75.176203862822	-2.33589399935828	0.944080767808798	-2.47425228752395	0.0133515374925805	0.862280468618376
FBgn0015558	1011.05096752261	-0.146479073361423	0.356959178424082	-0.410352449846239	0.681547421948437	0.92620664125531
FBgn0015561	68.2359335562911	0.416911841348794	0.419596698206921	0.993601339406147	0.320416991847786	0.862280468618376
FBgn0015568	1291.45549739743	-0.189643354412486	0.193672988244415	-0.97919361977911	0.327484320514588	0.862280468618376
FBgn0015569	987.349015785768	-0.446005533784575	0.349361624889355	-1.27663000744809	0.201732902651758	0.862280468618376
FBgn0015570	425.247552339933	-0.423179198797624	0.465682136265461	-0.908729723221317	0.363492810539874	0.862280468618376
FBgn0015571	4177.33195526447	0.295893357926323	0.230362952063329	1.28446590598031	0.198978985545212	0.862280468618376
FBgn0015572	152.227324822639	0.260106785668393	0.230996134079136	1.12602224580644	0.260156103312549	0.862280468618376
FBgn0015574	943.369077413929	0.352704358647298	0.257935645296512	1.36741224052939	0.171496127761256	0.862280468618376
FBgn0015575	3458.46371010357	-0.184713759508236	0.182883068043544	-1.01001017472135	0.31249041533622	0.862280468618376
FBgn0015576	1251.23302594634	-0.385734967287844	0.246787814626961	-1.56302274433976	0.118047245217657	0.862280468618376
FBgn0015577	1291.03574259698	-0.595950632936936	0.301984582178409	-1.97344721587427	0.0484446327329447	0.862280468618376
FBgn0015582	265.627968689886	-0.087088370687434	0.162387783201928	-0.536298784121834	0.591752070796319	0.897883822317841
FBgn0015583	1813.84994549895	0.548977538346868	0.414775572634566	1.32355320459177	0.185651475267255	0.862280468618376
FBgn0015584	19499.4963164307	0.605297608474375	0.498454904062538	1.21434778460607	0.224614945583565	0.862280468618376
FBgn0015585	6402.03330078782	0.603423198575606	0.515977800576515	1.16947511676159	0.242212260936195	0.862280468618376
FBgn0015586	5979.81243143635	0.201669837894083	0.274841006793092	0.733769098895439	0.463089476769519	0.871979853153491
FBgn0015589	1651.40857614682	-0.293037311428352	0.39021415086926	-0.750965362931017	0.452673501443177	0.871330352614604
FBgn0015591	474.273415134865	0.150898131399816	0.142245310500199	1.06083027179729	0.288767042296166	0.862280468618376
FBgn0015600	7485.43084334802	0.0252540984702224	0.225252122121882	0.112114808208367	0.910732376200414	0.983234477558871
FBgn0015602	472.960781585086	-0.160368699290533	0.301583204809232	-0.531756068418913	0.594894953358982	0.899800966947811
FBgn0015609	1346.84174401116	-0.29662088345293	0.397925186289351	-0.745418721089049	0.456018629875989	0.871330352614604
FBgn0015614	2283.53375326418	-0.396573930292743	0.285156225453168	-1.39072513553758	0.164308792491069	0.862280468618376
FBgn0015615	463.591667580095	-0.336202178290883	0.368040259027768	-0.913492940090332	0.360983344969682	0.862280468618376
FBgn0015618	73.9414743851545	-0.275019642804595	0.309902049565976	-0.887440541905952	0.374841764365023	0.862280468618376
FBgn0015621	136.4146936607	-0.144861251613812	0.221384988540524	-0.654340895328118	0.51289220409429	0.880871907382998
FBgn0015622	6969.92975358347	-0.0564061365612886	0.143809230364469	-0.392228902264014	0.694889090695487	0.929851132035743
FBgn0015623	23683.743694506	-0.483601434376336	0.332699656430058	-1.4535675797369	0.146066230762049	0.862280468618376
FBgn0015625	628.155899596578	-0.186377314507845	0.328051711791384	-0.56813394903535	0.569944017201679	0.89137639634554
FBgn0015663	206.284451943629	-0.528022905649886	0.360541936723093	-1.46452562619761	0.143050386464682	0.862280468618376
FBgn0015664	435.806957364185	-0.235617444062477	0.315025403322797	-0.747931568620346	0.454501434884457	0.871330352614604
FBgn0015714	1189.01161487693	-0.611943557522973	0.33078763232695	-1.84995900003338	0.0643194591302267	0.862280468618376
FBgn0015721	224.684819412977	-0.144148409914975	0.225744582320362	-0.638546486623583	0.523118003413129	0.881876796477609
FBgn0015737	2787.54245178317	-0.247585139156813	0.179806977031667	-1.3769495669415	0.16852784089686	0.862280468618376
FBgn0015754	2616.76741709938	-0.358696480336468	0.332797364392035	-1.07782247912854	0.281112985777342	0.862280468618376
FBgn0015756	17424.1866149496	0.254209100042089	0.268227601482476	0.947736544028624	0.34326359202054	0.862280468618376
FBgn0015765	542.911562978938	-0.242593051304916	0.22896017894201	-1.05954254764257	0.28935276282489	0.862280468618376
FBgn0015766	21283.7869716364	-0.0903236552487136	0.140300639140469	-0.643786484524004	0.519713899148932	0.881846580158195
FBgn0015770	33.2302044334567	-0.605261411033582	0.440349349993503	-1.37450279202754	0.169285644068787	0.862280468618376
FBgn0015772	1696.80738975091	-0.389129652721053	0.354626108624725	-1.09729555511334	0.272512213318152	0.862280468618376
FBgn0015773	246.961451089127	-0.315150753376417	0.32334171973623	-0.974667771401431	0.329725084477957	0.862280468618376
FBgn0015774	456.925533621667	-0.70292609676739	0.424273535865493	-1.65677572920843	0.0975648257277977	0.862280468618376
FBgn0015776	6659.69867754882	-0.423149381108622	0.307760283120458	-1.37493173848882	0.169152608438833	0.862280468618376
FBgn0015777	6260.05803588411	-0.0856777953146454	0.121856362460094	-0.703104816071491	0.481990431033206	0.87636988870685
FBgn0015778	6851.51880951779	-0.074296259855666	0.211005449126518	-0.352105882398886	0.724758857022097	0.939990537702736
FBgn0015781	574.137628836938	0.0478678426098127	0.143683253181566	0.333148377071644	0.739022283448135	0.944259345717444
FBgn0015789	1567.1185320426	-0.510193190050362	0.397498293047351	-1.28351039230648	0.19931332103948	0.862280468618376
FBgn0015790	3109.13678369424	-0.278238451677403	0.224933675353687	-1.23697997305161	0.216094517752009	0.862280468618376
FBgn0015791	2590.21314059793	0.0533432544142323	0.0966269113488091	0.552053808505489	0.58091148787386	0.894305198646305
FBgn0015793	817.689699972876	0.0247422754658382	0.11700817430836	0.211457666202305	0.832530162757122	0.96394780209328
FBgn0015794	971.265024197776	0.0149033500495975	0.185418298454954	0.0803769108754827	0.935937489932478	0.990529205656926
FBgn0015795	4042.55483537949	-0.22761964653386	0.248221954968495	-0.917000458572452	0.359142399823536	0.862280468618376
FBgn0015797	1014.41951537026	-0.189586288578944	0.20036773045382	-0.946191725331936	0.344050805866871	0.862280468618376
FBgn0015799	819.491179110963	-0.231443851495855	0.294628900083936	-0.785543615816098	0.432134908337106	0.865736188882361
FBgn0015801	1049.39383021368	-0.0351621080309788	0.207910387724681	-0.169121458604277	0.865701106522512	0.970151593571103
FBgn0015803	1165.41816647851	-0.182052615001478	0.264363222579412	-0.688645770108176	0.49104621059722	0.878396178577716
FBgn0015805	586.366266541984	-0.427282104429679	0.333362671878117	-1.2817335007019	0.199936148811138	0.862280468618376
FBgn0015806	1822.74347566815	-0.505069763525783	0.311962719584582	-1.61900679734536	0.105445800603766	0.862280468618376
FBgn0015808	2088.64667550253	0.0411110034862347	0.17668695590535	0.23267707157883	0.816012174830226	0.959059303973107
FBgn0015818	331.879426830052	-0.0166800035896494	0.144010759782478	-0.115824703757162	0.907791471512619	0.981603895695838
FBgn0015828	557.098166926229	0.0201791457504344	0.163531133682592	0.123396354541278	0.901793243668084	0.979013867910269
FBgn0015829	522.854144528597	0.0864983801781844	0.192527139537303	0.4492788932826	0.653230481731244	0.916559564191359
FBgn0015831	1416.31809074778	0.199742847631002	0.151098835569976	1.32193505580325	0.186189777817876	0.862280468618376
FBgn0015834	3403.28663759524	0.188392538301188	0.198656663056845	0.948332340845174	0.342960291633453	0.862280468618376
FBgn0015838	372.530949313245	-0.334603088428145	0.31562333936176	-1.06013417481979	0.289083562274729	0.862280468618376
FBgn0015872	1649.20331437865	-0.156009898396843	0.171019552336086	-0.912234281202267	0.36164540134346	0.862280468618376
FBgn0015903	600.775188960922	-0.355617215735638	0.375824280936495	-0.946232677807554	0.344029922308987	0.862280468618376
FBgn0015904	136.300677811219	-0.316380365570674	0.245714149742767	-1.28759522356318	0.197886902892747	0.862280468618376
FBgn0015905	483.662362357293	-0.0925541292085721	0.1737116276343	-0.532803304355759	0.594169746226938	0.899546000592808
FBgn0015919	291.228137014558	-0.153633261918738	0.263412979687452	-0.583241046439811	0.559731042901394	0.889641630341084
FBgn0015924	1747.12820519721	-0.374458359194435	0.317848407285899	-1.17810361987316	0.238755299114866	0.862280468618376
FBgn0015925	278.188964169331	-0.0750102739186253	0.211510256674405	-0.354641307225563	0.722858326305509	0.939268212661704
FBgn0015926	48.8349031639106	-2.06609212420862	1.02423492531754	-2.01720530430855	0.0436740927709581	0.862280468618376
FBgn0015929	309.245237501802	-0.262565021764285	0.444739786992123	-0.590378979897598	0.554936599788562	0.888034947207624
FBgn0015946	2.82541756300464	-0.0659670940804651	1.14365014143235	-0.0576811838608661	0.954002581842169	0.99673369313533
FBgn0015949	1509.50140429857	-0.138753680884823	0.17211613608276	-0.806163117780572	0.420148801839623	0.864415509334833
FBgn0016013	603.614708026022	0.0116451479551914	0.27663478079876	0.0420957477637734	0.966422369960883	0.999335904544736
FBgn0016031	1611.91119653785	-0.209896806095692	0.236509378486202	-0.887477728955842	0.374821751458967	0.862280468618376
FBgn0016032	294.291560694866	-0.028678829596365	0.182749953694875	-0.156929339879604	0.875300536455572	0.970440762224252
FBgn0016034	577.424522195752	0.00633336060163928	0.159802779845576	0.039632355630856	0.968386231632537	0.999335904544736
FBgn0016036	16.5302489361948	0.62664803949752	0.418802642828395	1.49628482586794	0.134579447648395	0.862280468618376
FBgn0016038	1434.5908623875	0.0634754805043822	0.140807601664797	0.450795835976883	0.65213670272309	0.91568598969847
FBgn0016041	1835.37893428418	-0.151505313656891	0.156365647538504	-0.968916869158135	0.332586668050262	0.862280468618376
FBgn0016047	93.6816396144311	-0.0130104008174361	0.269880069804767	-0.0482080830453612	0.961550408340706	0.99823260282176
FBgn0016053	172.659758269044	-4.26857957833934	2.05940968445752	-2.07271996949152	0.038198348202943	0.862280468618376
FBgn0016054	139.055814441055	-0.173654670045911	0.432140865961813	-0.401847369050387	0.687796358439166	0.928454029210634
FBgn0016059	1784.82025888439	-0.42694140073253	0.325664666769408	-1.3109847161738	0.189862927310258	0.862280468618376
FBgn0016061	524.004620951567	-0.317184330397427	0.354060823996563	-0.895847009610152	0.370334478778757	0.862280468618376
FBgn0016070	1832.17070789975	-0.808599442326385	0.566599477569547	-1.42710940326826	0.153548362504003	0.862280468618376
FBgn0016075	2253.65104596226	-0.51576518992286	0.467346508003951	-1.10360338868414	0.269765220584364	0.862280468618376
FBgn0016076	1648.22246496222	-0.37109519927904	0.29401279431796	-1.26217364159234	0.206886311129864	0.862280468618376
FBgn0016078	802.578164778848	-0.278155453222883	0.242504940997202	-1.14700942619595	0.251377725152013	0.862280468618376
FBgn0016080	2009.03982103646	0.087686366942886	0.218559097574393	0.401202090949518	0.688271341416601	0.928584282932839
FBgn0016081	4471.70707707594	-0.149898979586177	0.362542116593991	-0.413466388386673	0.67926494333468	0.925595319697217
FBgn0016119	6775.77406374691	0.243484713562529	0.340795115062681	0.714460691485397	0.474942354516433	0.874214035933752
FBgn0016120	7793.0555717193	0.132029830698878	0.333326477877988	0.396097638385652	0.69203300043176	0.929200127588175
FBgn0016122	4667.70372097338	-0.107511175124726	0.087851520956364	-1.22378274108797	0.22103419671656	0.862280468618376
FBgn0016123	5148.56312746986	0.229764323544631	0.340241823600008	0.675297119894187	0.499487013393967	0.880374594878312
FBgn0016126	5670.01463589253	-0.420265018971697	0.371805478523451	-1.1303357353439	0.258334782142318	0.862280468618376
FBgn0016131	155.720574689228	-0.520261399151082	0.402326640290197	-1.29313186612703	0.195965455524853	0.862280468618376
FBgn0016641	761.115011230832	-0.256628872003304	0.28066881846044	-0.914347640792437	0.360534204878872	0.862280468618376
FBgn0016650	371.343677988031	-0.143140411652825	0.156064966341319	-0.917184778932206	0.359045821478875	0.862280468618376
FBgn0016660	71.6878820536025	-0.159406384672455	0.254718252314988	-0.625814535172497	0.53143659690875	0.884323471079562
FBgn0016672	1881.40275372612	0.472119981395784	0.311527642931517	1.51549948169309	0.129645961482346	0.862280468618376
FBgn0016675	1457.19781435611	-0.148392467614106	0.233649060002474	-0.635108344165967	0.525357755352448	0.881876796477609
FBgn0016684	2294.90314825912	0.109229927871082	0.229394239682377	0.476166829743953	0.633955528789821	0.909143540896539
FBgn0016685	1753.44316349926	0.0164948917136396	0.178618918771219	0.0923468344065318	0.926422478839607	0.988144395427522
FBgn0016687	5440.10085932247	-0.0440468135203119	0.132683746736059	-0.331968418166031	0.739913106615973	0.944485337335226
FBgn0016691	8225.58697667266	0.260230146626285	0.348057877255724	0.747663430800878	0.454663194146922	0.871330352614604
FBgn0016693	5101.58304730259	0.0859845129195151	0.120593756111213	0.713009658976202	0.475839780198513	0.874543640863165
FBgn0016694	4797.68019302904	-0.804189402939538	0.4027498986374	-1.99674638196137	0.0458527408221305	0.862280468618376
FBgn0016696	3727.64822228885	0.111231394256483	0.166758953617567	0.667019022628155	0.504759982718823	0.880871907382998
FBgn0016697	3293.93002250452	0.144010492779032	0.131535641006217	1.09484008803534	0.273586700343699	0.862280468618376
FBgn0016698	523.047509144449	0.204044828552298	0.221984490086934	0.919185067715269	0.357998780148507	0.862280468618376
FBgn0016700	5087.1172716761	-0.0911125054488462	0.141121379862136	-0.645632189380913	0.518517585654066	0.881452903546027
FBgn0016701	1432.17765193109	-0.0430732186563847	0.14550679642695	-0.296022039616611	0.767213250117638	0.947820762446549
FBgn0016715	829.048542362095	0.210745945019455	0.226585920735036	0.930092851028887	0.352323011915938	0.862280468618376
FBgn0016726	8887.32005668513	0.237959123725682	0.344291523521305	0.691155917206182	0.48946756339534	0.878396178577716
FBgn0016754	1085.91527203896	-0.345318466734837	0.335859950803387	-1.02816208335893	0.303873590904829	0.862280468618376
FBgn0016756	8353.77799439427	-0.0785390766363084	0.191404374546722	-0.410330625004274	0.681563429609424	0.92620664125531
FBgn0016762	212.483991356278	0.414959775736212	0.313365620892475	1.32420325674014	0.185435549546377	0.862280468618376
FBgn0016792	427.946935814311	-0.373119397155713	0.401544475293351	-0.929210635716326	0.352779936615326	0.862280468618376
FBgn0016794	453.798016962022	-0.350838376730105	0.428679284815231	-0.81841691249747	0.413119167807353	0.863505398638206
FBgn0016797	1198.56329411547	-0.418589966795124	0.467647230002366	-0.895097714559341	0.370734855577016	0.862280468618376
FBgn0016917	3499.04713818371	-0.415939327204972	0.327638047570933	-1.26950862480317	0.204259716385848	0.862280468618376
FBgn0016919	692.359822237574	0.28573706095545	0.278853579884951	1.02468492989525	0.305511876056764	0.862280468618376
FBgn0016920	196.16609031755	-0.209244229170321	0.371399204013354	-0.56339439317376	0.573166354268859	0.89137639634554
FBgn0016926	8790.98358822073	-0.295621784943442	0.250656332145189	-1.17939085126406	0.238242576424763	0.862280468618376
FBgn0016930	1109.45932951071	-0.398583574976751	0.38823110771891	-1.02666573350772	0.304577889897765	0.862280468618376
FBgn0016970	272.723135119406	0.146997186492967	0.236592096632481	0.621310637951321	0.534395255693029	0.884594003316209
FBgn0016974	943.40555599741	0.0782379864615537	0.148055274238466	0.528437685614222	0.597195586871392	0.89992502088346
FBgn0016975	0	NA	NA	NA	NA	NA
FBgn0016976	0	NA	NA	NA	NA	NA
FBgn0016977	5695.45690765651	-0.583198270352082	0.471478657122882	-1.23695582300787	0.216103483845275	0.862280468618376
FBgn0016978	893.334320006205	0.00511032694958041	0.121387487532655	0.042099289255045	0.966419546762421	0.999335904544736
FBgn0016983	947.97844151743	-0.148594020417772	0.281093079581547	-0.52862923782748	0.597062673807212	0.89992502088346
FBgn0016984	1476.53220746468	-0.144710492110679	0.231897069370021	-0.624028981926352	0.532608551883848	0.884557653211185
FBgn0017414	218.969379930518	-0.170345335745127	0.198798273663898	-0.856875326961463	0.391513789859386	0.862280468618376
FBgn0017418	1581.85954206388	-0.493335993073336	0.290778391875108	-1.69660472324652	0.0897714162490888	0.862280468618376
FBgn0017424	19.2208962183306	0.0265227932356154	0.432942279981817	0.0612617304014043	0.951150768245302	0.996059908051765
FBgn0017429	622.875687401026	0.192280296708177	0.242310827333042	0.793527465629504	0.427470573725759	0.865018364870926
FBgn0017430	518.999111646847	0.0807631649750081	0.15458348522063	0.522456618569173	0.601352443627466	0.901194794138944
FBgn0017448	1111.59041998217	0.0419478153698307	0.21630276579262	0.193931017091331	0.846229896596662	0.966916649385427
FBgn0017456	1748.57935900038	0.356348931612812	0.286869716357514	1.24219780371905	0.214163589813515	0.862280468618376
FBgn0017457	753.638362958277	-0.0172308457665335	0.162736290622994	-0.105882011323778	0.915675966712292	0.985120660856118
FBgn0017482	297.937351637387	-0.144285916946143	0.182938457210412	-0.788712877250235	0.430279839833465	0.865116269523557
FBgn0017545	27403.0849624035	0.0472858560033729	0.138492112127319	0.341433568143591	0.732777207996255	0.942932571156463
FBgn0017550	1286.74060291682	-0.0139747254689125	0.136557344604363	-0.102335949116471	0.918490021813683	0.985743727893639
FBgn0017551	381.013020274355	-0.015970326741574	0.260747822397027	-0.0612481691879938	0.951161568247374	0.996059908051765
FBgn0017556	1405.79639455516	0.270795283905749	0.228002543545085	1.18768536392316	0.23495739216745	0.862280468618376
FBgn0017558	3793.51588452008	-0.250637558580082	0.266205524162049	-0.941518998784976	0.346438957807333	0.862280468618376
FBgn0017561	567.669691780456	-0.354817086641561	0.34137859060228	-1.03936537442366	0.298634841204437	0.862280468618376
FBgn0017566	7954.12607312825	0.0183325868856952	0.174438836976672	0.105094640639841	0.916300711904846	0.985120660856118
FBgn0017567	3924.1316690107	0.151728221627966	0.281838211538	0.538352201427836	0.590333918870028	0.897232823914159
FBgn0017572	1232.33083230299	-0.195129291590723	0.174812969237895	-1.11621747769286	0.264329054956727	0.862280468618376
FBgn0017577	129.161806196158	-1.90818629955123	1.07816721486729	-1.76984263038096	0.0767533600109971	0.862280468618376
FBgn0017578	612.607042727424	-0.305803821210033	0.195027677669184	-1.56800216699885	0.116880626623234	0.862280468618376
FBgn0017579	15418.9191347393	0.152855577996322	0.277687160978782	0.550459651996663	0.582004143780468	0.894305198646305
FBgn0017581	25257.9636454272	-0.274769021876086	0.317132811130475	-0.866416252851996	0.386261934210599	0.862280468618376
FBgn0017590	461.701403867341	-0.138996841322668	0.201877634239612	-0.688520260534111	0.491125216092105	0.878396178577716
FBgn0019624	9126.58591376725	0.0682858015667764	0.234668575494884	0.290988264716616	0.771060294748313	0.947820762446549
FBgn0019637	433.520031133374	-0.00786454024820391	0.144623749043326	-0.0543793139109389	0.956632959572564	0.997232234149335
FBgn0019643	3442.95941139417	-0.0720625616338191	0.178542124429741	-0.403616579919082	0.686494691600546	0.92828419876958
FBgn0019644	9344.93405395345	0.0955655397708439	0.307418545819184	0.310864588589438	0.755903565804078	0.947820762446549
FBgn0019650	360.869305253705	-0.217336906129139	0.243486355166547	-0.892604047485448	0.372069250895175	0.862280468618376
FBgn0019660	410.842373455008	-0.0290000224022624	0.275446583157699	-0.10528365271338	0.916150734123049	0.985120660856118
FBgn0019661	11678.5103987459	-0.376169387546857	0.217795350540759	-1.72716904476094	0.084137308465221	0.862280468618376
FBgn0019662	729.807120649386	-0.301720896388181	0.250299685672232	-1.20543857487414	0.228034037421105	0.862280468618376
FBgn0019686	385.529537663462	-0.967999058708731	0.654253787116866	-1.47954674129509	0.138994248669556	0.862280468618376
FBgn0019809	6.82018898715866	-0.220111971920969	0.725624509472479	-0.303341423901168	0.761629680681739	0.947820762446549
FBgn0019828	14990.1320332465	0.150630085110775	0.250658300880689	0.600937948520097	0.547881316404579	0.885635692926836
FBgn0019830	2533.94376353897	0.162503241783876	0.264398113544441	0.614615738385599	0.538808518227392	0.885077010625439
FBgn0019886	4895.37440984552	-0.123526449003628	0.204621123150576	-0.6036837600228	0.546053913236454	0.885297275953961
FBgn0019890	2654.78384501753	-0.156797466857328	0.28574510561559	-0.548731942475565	0.583189421779502	0.894361847427529
FBgn0019925	2430.78106207794	-0.234002788592395	0.177035294336585	-1.32178608491199	0.186239393248692	0.862280468618376
FBgn0019928	1036.02658605975	0.0177361631249775	0.277495275290528	0.0639151895700148	0.949037757481104	0.995551685579534
FBgn0019929	892.297566504523	-0.132660258050375	0.198148479704476	-0.669499247474562	0.503177060586646	0.880871907382998
FBgn0019932	1111.68043253422	-0.186581910747059	0.20080703845732	-0.929160213608326	0.352806062997115	0.862280468618376
FBgn0019936	11144.4146696423	0.369393369916218	0.385725752055328	0.957658045769348	0.338235218904408	0.862280468618376
FBgn0019938	519.683854596421	-0.303221670767234	0.219329612741736	-1.38249307504264	0.166820355305131	0.862280468618376
FBgn0019940	634.506722726766	-0.136991026685713	0.660324018801644	-0.207460311582069	0.835650385134743	0.964174743488626
FBgn0019947	1066.27850457225	0.135028777030326	0.119973502951848	1.12548832623917	0.26038216126045	0.862280468618376
FBgn0019948	3121.93673740636	-0.032049604869706	0.162036491524895	-0.197792513082043	0.843207404147983	0.966504068605401
FBgn0019949	351.135755789374	-0.0407363498895999	0.158528903420871	-0.256964812160788	0.797205936981165	0.951635368148894
FBgn0019952	628.469522202843	-0.0709105941541493	0.155296971040551	-0.456612860373389	0.647949333908424	0.914053179199169
FBgn0019957	4789.158078965	0.240511273433213	0.297600346503232	0.808168660618817	0.418993496157286	0.864415509334833
FBgn0019960	6073.4253637247	-0.0718421042447444	0.177903099343097	-0.403827164956763	0.686339819050378	0.928156084599518
FBgn0019968	3173.89284101073	-0.268163549692313	0.388951639871208	-0.689452163721715	0.490538766591492	0.878396178577716
FBgn0019972	276.960750207049	-0.468822739801932	0.340690090062797	-1.3760973784577	0.168791487074091	0.862280468618376
FBgn0019982	1554.15157616598	0.0798116365216169	0.213724233939485	0.373432787899079	0.708826360350107	0.933364259015851
FBgn0019985	324.669234892071	-0.567277945380609	0.432459294579522	-1.31174876454481	0.189604917295516	0.862280468618376
FBgn0019990	752.603714960981	-0.144567252981404	0.383578440419668	-0.376890976519	0.706254627501141	0.932387292529223
FBgn0020018	1346.38790296687	0.390353129438717	0.250571932892143	1.55784857838305	0.119269147240467	0.862280468618376
FBgn0020224	1295.67126034504	-0.182822610271672	0.224750182631382	-0.813448105497308	0.415961188029095	0.863658987555832
FBgn0020235	8810.79250926656	0.132151841512885	0.262799784172566	0.50286130153786	0.615061790576907	0.902845333861396
FBgn0020236	9781.14154864323	-0.159164177921188	0.339477641710184	-0.468850252167911	0.639176677455499	0.910376374039525
FBgn0020238	9397.67921638232	-0.20524141222953	0.187981974633505	-1.09181432224912	0.274914722513504	0.862280468618376
FBgn0020248	54.2420384882654	-0.952259749637709	0.864299069650627	-1.10177111497139	0.270561191009245	0.862280468618376
FBgn0020249	1575.71442960782	0.00489222305251578	0.153243943187035	0.0319244137860953	0.974532329174208	0.999335904544736
FBgn0020251	787.971614837277	-0.425385508760404	0.361762674262696	-1.17586898545401	0.239647234125608	0.862280468618376
FBgn0020255	5406.93287536389	-0.0639113019636276	0.192263401615719	-0.332415329316644	0.739575664925602	0.944380343857452
FBgn0020257	764.458910899913	-0.481784372355686	0.335252551429602	-1.4370789134974	0.150695572059935	0.862280468618376
FBgn0020258	39.135888013894	-0.1534848608667	0.265761620478782	-0.577528314999696	0.563582616635442	0.889825455846315
FBgn0020261	1114.88431543338	-0.0613097466642828	0.281339963809486	-0.217920503842105	0.827491051291253	0.962821484036455
FBgn0020269	452.058351116033	-0.2432408414279	0.164169021915102	-1.48164884331033	0.138433755509978	0.862280468618376
FBgn0020270	202.641636722717	-0.154937761389794	0.185700191483657	-0.834343573649089	0.404087404235426	0.863203104675502
FBgn0020272	98.5308196303542	-0.166372533952338	0.309741358111794	-0.537133739473983	0.59117523669443	0.897780840459067
FBgn0020277	187.454673641241	0.159585395000634	0.192019015562741	0.831091621488347	0.405921872553262	0.863505398638206
FBgn0020278	714.747152747266	-0.0900819957502555	0.206651064054902	-0.435913534547893	0.662899464879727	0.920182903888525
FBgn0020279	4276.03785478975	-0.128798931149067	0.365658344782509	-0.352238456982777	0.72465943820401	0.939963957323745
FBgn0020280	812.955914948475	0.0235149736851773	0.14824513973018	0.158622223487237	0.873966518664715	0.970151593571103
FBgn0020294	482.631218147491	-0.278292764822818	0.232640475645954	-1.19623536725544	0.231604722831981	0.862280468618376
FBgn0020299	492.149532044453	-0.245052276561316	0.296608044330128	-0.826182166147085	0.408700763168938	0.863505398638206
FBgn0020300	1489.08387630601	-0.119399619832195	0.153711244899093	-0.776778692480027	0.437289349975376	0.867478126229958
FBgn0020304	2713.39657310697	-0.211172015184377	0.195292210117076	-1.08131304908568	0.279557884790095	0.862280468618376
FBgn0020305	315.94121053697	-0.0723237875539483	0.223048301632243	-0.324251684611318	0.745747495282833	0.946708529231698
FBgn0020306	3549.92569809221	-0.386513603443556	0.436182120625322	-0.886128947443879	0.375548045850762	0.862280468618376
FBgn0020307	530.687814148427	-0.210842887643391	0.364812706861985	-0.577948310674267	0.563299017349738	0.889825455846315
FBgn0020309	3242.44918647453	-0.512280713334406	0.423915334086607	-1.20845053750697	0.226874010580974	0.862280468618376
FBgn0020312	359.842365724494	-0.319442340862002	0.307904672269285	-1.03747156062194	0.29951614303003	0.862280468618376
FBgn0020369	2288.1445030043	-0.00633445216324439	0.118759553057175	-0.0533384641502882	0.957462233845575	0.997476128005522
FBgn0020370	2040.7883727775	-0.155048341751731	0.183110485244056	-0.846747478961008	0.397135888393472	0.862280468618376
FBgn0020371	2734.84192289733	0.402286759123908	0.220501337678624	1.82441867863057	0.0680888002676021	0.862280468618376
FBgn0020372	1131.04144738752	0.0406971479877864	0.24918027024867	0.163324118507346	0.870263245038209	0.970151593571103
FBgn0020376	3.07828498905644	-0.228522785230492	1.07392597085651	-0.212791934855839	0.831489254737842	0.96394780209328
FBgn0020377	103.800582518809	-0.325398288808945	0.267931968088706	-1.21448101594661	0.224564094852482	0.862280468618376
FBgn0020378	314.141735749004	-0.179347424827833	0.251984772980794	-0.711739136878333	0.476626327740712	0.874613974724891
FBgn0020379	620.804113365896	-0.10860305143779	0.270143383849088	-0.402020030586644	0.687669284827605	0.928454029210634
FBgn0020381	589.330918626161	0.0578267119188175	0.156597706943662	0.369269212477176	0.711927071298968	0.935020632769269
FBgn0020385	4073.81077192798	-0.0693916092474609	0.296696431095926	-0.233880835678221	0.815077491552882	0.958969972768084
FBgn0020386	4408.98707479041	-0.260644874808503	0.240858440404177	-1.0821496409722	0.279186041068896	0.862280468618376
FBgn0020388	549.434613569259	-0.303569511306241	0.290606236989942	-1.04460769476447	0.296204321778979	0.862280468618376
FBgn0020389	363.920872551663	-0.128309813544992	0.161165673524966	-0.79613611719319	0.425952923552242	0.865018364870926
FBgn0020391	94.7812471772993	0.0474011063394216	0.217064436671716	0.218373433558396	0.827138163000166	0.962685289433794
FBgn0020392	628.751003783965	-0.0333751296033855	0.179355803617933	-0.186083354595437	0.852379395041554	0.968421948285695
FBgn0020399	1787.92065422289	0.132971086386069	0.133898831438311	0.993071298365521	0.320675209944695	0.862280468618376
FBgn0020407	130.352013868319	-0.179065984535982	0.315347153298256	-0.567837643888991	0.570145216215265	0.89137639634554
FBgn0020412	2629.28876880058	-0.0817276031039298	0.263610784608118	-0.310031333602021	0.756537128749134	0.947820762446549
FBgn0020414	4320.41218325346	0.1596347525277	0.225690057901322	0.707318496933952	0.479368573325993	0.875419982693973
FBgn0020415	2594.12217705563	-0.248354397088116	0.165147281209407	-1.50383582018042	0.132623645563924	0.862280468618376
FBgn0020416	837.087265206277	-0.177636113400571	0.161765061451226	-1.09811174184934	0.272155698724469	0.862280468618376
FBgn0020429	12.0013010714434	0.0383268480765594	0.514217065271396	0.0745343759766724	0.940585189153254	0.992272518709404
FBgn0020440	727.976275623373	-0.374942912305734	0.344175103360134	-1.08939580069917	0.275979382425988	0.862280468618376
FBgn0020443	3436.89150628473	-0.304576029541362	0.281711605371049	-1.08116252129619	0.279624826268988	0.862280468618376
FBgn0020445	226.790114178787	-0.509228694189051	0.507312631992188	-1.00377688643261	0.315486167642865	0.862280468618376
FBgn0020493	903.279701596954	-0.413280157396099	0.235724952606263	-1.75323041887046	0.0795624635936477	0.862280468618376
FBgn0020496	3046.95091483108	-0.46878960943757	0.296839129885475	-1.5792716062011	0.114273771657672	0.862280468618376
FBgn0020497	1523.88577439969	-0.508239238648101	0.397312865729482	-1.27919149488138	0.200829630157126	0.862280468618376
FBgn0020503	10540.6462184699	-0.240877300721556	0.226321259655705	-1.06431583620555	0.287185646377471	0.862280468618376
FBgn0020506	211.3544856159	1.94261484164729	1.01634368697405	1.91137591205099	0.055956289945505	0.862280468618376
FBgn0020508	666.558896942989	0.205201124588301	0.215630879288366	0.951631441960052	0.341283929836506	0.862280468618376
FBgn0020509	10915.1401887474	0.688783305541312	0.493000133263205	1.39712600275015	0.162375683671729	0.862280468618376
FBgn0020510	891.563600553928	-0.241672040606938	0.155697896246912	-1.55218565203787	0.120617808186813	0.862280468618376
FBgn0020513	4294.2598751848	-0.0485088064506795	0.254716964311656	-0.19044199345642	0.848962793733459	0.967231224150112
FBgn0020518	4.92760784118148	-1.1843244533416	0.852000056003336	-1.3900520839132	0.164513062043379	0.862280468618376
FBgn0020521	1569.97224021339	-0.139938243088302	0.102691225341242	-1.36270886459178	0.172974282959465	0.862280468618376
FBgn0020545	2302.83182857606	0.0803809587212856	0.126855216961718	0.633643303338029	0.526313633688106	0.881903851186126
FBgn0020546	2.38436037345106	-0.839868190827537	1.52284963076177	-0.551510913396888	0.581283487512545	0.894305198646305
FBgn0020556	8.27142439633789	0.513739660609224	0.585476891749668	0.877472139120537	0.380230245240028	0.862280468618376
FBgn0020616	423.904730045943	-0.384692569872535	0.383869535339935	-1.00214404753915	0.316274026714025	0.862280468618376
FBgn0020617	38.8292623844877	-0.0201052811215329	0.342488418757556	-0.0587035357121528	0.953188243105963	0.996688852387334
FBgn0020618	21662.6882503609	0.326020611185427	0.292528678425126	1.11449110883969	0.265068556693522	0.862280468618376
FBgn0020620	1137.38652021605	-0.213422765652635	0.309378688896589	-0.68984313823882	0.490292837293772	0.878396178577716
FBgn0020621	2885.84505924893	-0.312623897881114	0.282014716614818	-1.10853753177748	0.267629739482727	0.862280468618376
FBgn0020622	958.482262240293	-0.528005116148357	0.412481150393227	-1.28007089692462	0.20052020295621	0.862280468618376
FBgn0020626	2307.02920775896	-0.0713446821858916	0.23919172232931	-0.298274043479092	0.765494013439033	0.947820762446549
FBgn0020633	107.048949865247	-1.795097251969	1.18358363963156	-1.51666277892097	0.129351846315801	0.862280468618376
FBgn0020637	14.6921139458855	0.444138678292764	0.592440150517038	0.749676870997268	0.45344934081038	0.871330352614604
FBgn0020638	0.349114595030014	-1.07962329339428	3.73694399913159	-0.28890539800574	0.772653772783052	0.947820762446549
FBgn0020639	1.9712965510275	0.9772155962507	1.37129814423784	0.712620811423784	0.476080430111747	0.874598247824665
FBgn0020640	1.0956887659632	1.50311056652129	2.14284083267554	0.701456936791944	0.483017900089508	0.876667929580943
FBgn0020641	2.81639183861263	1.76075605039763	1.09669988692395	1.60550399557006	0.108382934581957	0.862280468618376
FBgn0020642	5.76738772807752	1.37246166966886	0.809969979261075	1.69445992420724	0.0901779208370005	0.862280468618376
FBgn0020643	0	NA	NA	NA	NA	NA
FBgn0020644	0	NA	NA	NA	NA	NA
FBgn0020645	0	NA	NA	NA	NA	NA
FBgn0020646	0	NA	NA	NA	NA	NA
FBgn0020647	4360.5323252674	-0.0457705673847646	0.195125277219154	-0.234570159423054	0.814542372701769	0.95880780068341
FBgn0020653	6776.8166595877	0.0491154912906481	0.18358184559452	0.267540023533319	0.7890534025228	0.949662655093802
FBgn0020655	1028.22386243273	-0.041157740981135	0.151806321757568	-0.271120072633492	0.786298683828354	0.949326006325744
FBgn0020660	959.918985826027	-0.0571224146849062	0.229272057106464	-0.249146866852515	0.80324717769191	0.953848721262073
FBgn0020762	1074.56285763501	-0.32215405760896	0.277168856014672	-1.1623025120539	0.245112606590458	0.862280468618376
FBgn0020764	6272.13905841596	-0.0163335767751506	0.174031046495509	-0.0938543846288494	0.925224829615266	0.987954864004704
FBgn0020765	130.629280707578	-3.34406656108951	1.37026235339248	-2.44045715246448	0.0146686859577128	0.862280468618376
FBgn0020766	841.694778017403	0.157045584363669	0.24564388554029	0.639322179822426	0.522613362470788	0.881876796477609
FBgn0020767	1377.28036484003	-0.339595084873339	0.29566226828955	-1.14859121807441	0.250724579944497	0.862280468618376
FBgn0020880	7.48058200126323	-1.0144383239439	0.596052715770843	-1.70192719050359	0.0887690179325573	0.862280468618376
FBgn0020887	688.216714887026	-0.180159508358559	0.305433517607584	-0.589848520128775	0.555292210149452	0.888034947207624
FBgn0020906	3160.71753100622	-0.220923907915057	0.273119789963966	-0.808890150157939	0.418578335064842	0.864415509334833
FBgn0020907	1476.439746879	-0.461919117014685	0.281128013710108	-1.64309173930636	0.100363953755801	0.862280468618376
FBgn0020908	40163.3723123499	-0.319567810572954	0.203359708102895	-1.57144113528753	0.116080217399097	0.862280468618376
FBgn0020909	164.048572392439	0.190022355943609	0.220417015361031	0.862103842719961	0.388630376978813	0.862280468618376
FBgn0020910	33694.2201551556	0.279826517976944	0.305942724762243	0.914636941258873	0.360382258696337	0.862280468618376
FBgn0020912	614.797726955469	-0.215911004007747	0.322523300094891	-0.669443119130379	0.503212853636754	0.880871907382998
FBgn0020930	1045.31737408244	0.0502397063540649	0.104494820821838	0.480786568740311	0.630668197113629	0.908805831277673
FBgn0021738	78.0801641188093	0.0151526958493407	0.277290655154439	0.0546455337303067	0.956420862258417	0.997232234149335
FBgn0021742	2.73109023152495	-0.00255252664261471	1.10450144119195	-0.00231102155906658	0.998156073219685	1
FBgn0021750	251.638724699448	0.103162778744364	0.161945065943148	0.637023290234604	0.524109673126293	0.881876796477609
[truncated: 15,559 more rows]

## Sheet: Driver ctrl vs CG18549 RNAi KD
Flybase Gene ID	baseMean	log2FoldChange	lfcSE	stat	pvalue	padj
FBgn0000003	78.5440088637727	1.13275770296974	0.928742545646711	1.21966815053247	0.222590699954351	0.362856940698278
FBgn0000008	477.693103492774	-0.369526653926738	0.225162997147584	-1.64115178163369	0.100765912078714	0.222232700076782
FBgn0000014	443.953265425064	-0.606044104843081	0.19254110901526	-3.14760888177417	0.00164611786835635	0.0406108378757941
FBgn0000015	385.135541828673	-0.776839391573808	0.260667531954255	-2.98019237666369	0.00288067410542013	0.04865384700616
FBgn0000017	1552.1051924553	-0.732075177877696	0.376326603334316	-1.94531869761901	0.0517366331247412	0.156454260266164
FBgn0000018	271.650303050588	-0.164546482242547	0.179415026747565	-0.917127652156256	0.359075752451651	0.501108470635387
FBgn0000022	0.0925714499852765	1.05472934698451	3.81693625648277	0.276328782067852	0.782295551301721	NA
FBgn0000024	1751.62902151555	-0.780575646596388	0.341317056296422	-2.28695177166442	0.0221986382739905	0.106809664215322
FBgn0000028	329.533140834814	0.186455849759542	0.21994054180788	0.847755708096841	0.396574034553902	0.537042337244901
FBgn0000032	656.987733059461	-0.427355315556294	0.28682517047859	-1.48995053273469	0.136237243180198	0.265305165063699
FBgn0000036	551.905864781056	-0.770133857113949	0.390452777314807	-1.97241229121292	0.048562559850088	0.151709725566013
FBgn0000037	464.757646261603	-0.618957611725646	0.27711641274435	-2.2335653294439	0.0255116873034829	0.113659441506961
FBgn0000038	2045.87344745171	-0.139664620061838	0.163024856464919	-0.856707517432424	0.39160654772079	0.532407085621639
FBgn0000039	218.893281448045	0.43030092762292	0.289068159145914	1.48857947168687	0.136598140622949	0.26565454747073
FBgn0000042	22124.6373580345	-0.245125708777531	0.168884539892429	-1.45143959851899	0.14665748998738	0.277354722339097
FBgn0000043	4658.81851072365	-0.156819270749932	0.105784168152507	-1.482445563346	0.13822177802482	0.267693418222581
FBgn0000044	20571.3360494901	-0.134696852871892	0.120182785452157	-1.12076660867136	0.26238722101084	0.404406885447897
FBgn0000045	19586.4733492135	0.0308069748343972	0.225426223705268	0.136661007437518	0.891298751842732	0.926753729816586
FBgn0000046	11401.3241190141	-0.161737230367116	0.0958090807904759	-1.68812005117571	0.0913881861392059	0.21147865171226
FBgn0000047	1347.34274128362	0.664623227261603	0.680283071690807	0.976980399658804	0.328578856003543	0.471741265147197
FBgn0000052	1809.44911291357	-0.326134065405063	0.335523657347545	-0.972015112088637	0.331043030527809	0.473920269801168
FBgn0000053	1303.81974309547	-0.383082434648668	0.445147153288306	-0.86057482748982	0.389472254939423	0.530271734900307
FBgn0000054	648.332624487099	-0.120561989309839	0.125684584084216	-0.959242457524113	0.337436616120038	0.479960049747936
FBgn0000055	408.336345883852	-0.890424082156266	0.263683424880397	-3.3768678579632	0.000733162630878288	0.0314710133785825
FBgn0000056	0	NA	NA	NA	NA	NA
FBgn0000057	1166.23096209425	-0.236019018609294	0.156906948384995	-1.50419736690172	0.13253055554471	0.261016733271284
FBgn0000061	17.3035010742168	-0.590932978908441	0.524159022499397	-1.12739255367701	0.259576545974003	NA
FBgn0000063	207.917268346762	-0.0911966424674881	0.203234365885986	-0.448726484174676	0.653628977085177	0.753360292573939
FBgn0000064	35690.5454381055	-0.371427687451198	0.175673501640521	-2.11430684754748	0.0344890678974034	0.130281649018833
FBgn0000071	15.4295785686771	0.145188841164118	0.538478587304355	0.269627882309933	0.787446547541258	NA
FBgn0000075	80.2661516402602	0.427843770265427	0.310621481044039	1.3773798541794	0.16839483807898	0.302444934812881
FBgn0000077	175.826887062962	0.106375940312111	0.247960597425065	0.429003403834186	0.6679207475862	0.765080247691557
FBgn0000078	9666.70162996427	-0.0142313536378953	0.424567302715609	-0.0335196647195133	0.973260184463919	0.98218832596558
FBgn0000079	23175.1011124737	0.241116831662158	0.263688871155644	0.914398968016505	0.360507243897877	0.502573802233929
FBgn0000083	4759.35647093081	-0.186636180717269	0.14562318576448	-1.28163780882476	0.19996973056922	0.337095486950596
FBgn0000084	1613.04019371466	0.187227921975775	0.148955427002626	1.25693924513723	0.208775636176725	0.34712178163958
FBgn0000092	59.506385799586	1.12718261228565	0.539463819322321	2.08944987951486	0.0366672451930875	0.133535610399976
FBgn0000094	9443.63997886063	0.847624091928433	0.458741351205133	1.84771677918655	0.0646433253362263	0.175589931542154
FBgn0000097	860.078828230872	-0.521737726255683	0.376225434226345	-1.38676888586377	0.165512247564435	0.299618307058795
FBgn0000099	831.4094173387	-0.552767724986487	0.247614148217549	-2.23237536693919	0.025590164466976	0.113739820070156
FBgn0000100	22373.0223542138	0.722469586817891	0.220194850598631	3.28104669502377	0.00103422620608212	0.034956561757724
FBgn0000108	3493.29315073493	-0.794471788763916	0.342894693092605	-2.31695562739244	0.0205061490346473	0.103149296442323
FBgn0000109	316.042163299429	0.366119935416895	0.240503340852231	1.5223070670018	0.127932158153029	0.255592698135882
FBgn0000114	9116.66319581728	-0.348141521223467	0.220028913444262	-1.58225351283962	0.11359170850393	0.237977555182743
FBgn0000115	700.988310018153	0.343309552156656	0.159271019868326	2.15550545504436	0.031122302212409	0.12465070753453
FBgn0000116	34420.2330094948	-0.181310815013615	0.144230466228591	-1.2570909583434	0.208720700823282	0.347102194696487
FBgn0000117	3585.02488756114	-0.222728173129694	0.205541614073364	-1.08361595842191	0.278535112126816	0.420660502941497
FBgn0000119	840.481356297124	-0.932381004014312	0.413869688450234	-2.25283713698793	0.0242694196866743	0.111270216936514
FBgn0000120	28369.2919559965	0.0820964771162291	0.196592664221801	0.417596849003509	0.676241900980267	0.770901273142426
FBgn0000121	37761.6834391142	0.145078999441457	0.214641694434556	0.675912477413334	0.499096215259066	0.628293697068603
FBgn0000137	1.10043962318205	-0.866978801400533	1.77944951256093	-0.487217420489105	0.626104261352567	NA
FBgn0000139	654.872221109424	0.0389921426072209	0.135252176407226	0.288292163889629	0.773123104961075	0.843837927486098
FBgn0000140	733.733236849472	-0.308203907974252	0.413446906088963	-0.745449786744648	0.455999855829292	0.591092277732034
FBgn0000146	198.284261618378	-0.120672743441327	0.40791037935467	-0.295831509931755	0.767358758009742	0.839592572908549
FBgn0000147	699.214532876297	-0.133390122757841	0.180161143639495	-0.740393405943055	0.459061318784506	0.593665830339362
FBgn0000150	10422.0616148544	0.939413934322178	0.304636068266569	3.08372524523312	0.00204426294532572	0.0432281220573372
FBgn0000152	336.896590076425	0.119916220629049	0.118511395702405	1.01185392272463	0.311607903161861	0.454861220637602
FBgn0000153	1013.39727401114	0.212736716212875	0.202252705050263	1.05183619749366	0.292874708510892	0.435267001423771
FBgn0000157	246.300793676573	-0.327604903308927	0.240996469934922	-1.3593763568296	0.174027359217195	0.30864787699614
FBgn0000158	55.3773012520994	0.168093802188995	0.62237868366205	0.270082839598456	0.787096523715904	0.853581269266388
FBgn0000163	1425.22010072026	-0.596847762571952	0.355790796615297	-1.67752445608451	0.0934399712605155	0.213860003715433
FBgn0000166	51.8768040988636	0.807889684158563	1.84069451693398	0.438904813767934	0.660730508584859	0.758685044462999
FBgn0000173	1939.53469293206	-0.253770525597063	0.244695267157692	-1.03708800151628	0.299694846476142	0.442422670044452
FBgn0000179	184.283266572207	-1.09929270304244	0.377864693260944	-2.90922312311222	0.00362328168140848	0.0524863232324402
FBgn0000180	96.4916980366964	-0.47433911818746	0.345434344684762	-1.37316721827511	0.16970036824276	0.304123686907985
FBgn0000181	11853.5730047907	0.402586389118952	0.159388841659332	2.52581287954534	0.0115430944824737	0.0812767112304159
FBgn0000182	120.100240590119	-1.67087352161882	0.612123131590703	-2.72963630254713	0.0063404232321196	0.0640839658707587
FBgn0000183	1591.29057468156	-0.353334281980802	0.363466334283227	-0.972123821804829	0.330988952373699	0.473920269801168
FBgn0000206	707.849297699716	0.0543703647411233	0.21009605972045	0.258788122030786	0.795798723012139	0.859614002702683
FBgn0000210	307.515473291586	-0.638826255056078	0.330929865915296	-1.93039770916171	0.0535575785692485	0.159170381480963
FBgn0000212	1320.00853317494	-0.481471413491098	0.362304780458599	-1.32891267093319	0.183876782959829	0.319239949751289
FBgn0000216	1.40244667144912	1.39894718823438	3.52096342221239	0.39731943234882	0.691131919315052	NA
FBgn0000221	157.423846309431	0.0765315960532537	0.237378942615424	0.322402632727378	0.747147689994308	0.825056468397738
FBgn0000227	0	NA	NA	NA	NA	NA
FBgn0000228	1007.77778542462	-0.54399247021405	0.342847315922566	-1.58669018233444	0.112582830980843	0.236814021290376
FBgn0000229	1345.49455898436	-0.327005784483471	0.168859095540739	-1.93656008541498	0.0527991410702523	0.158337328581722
FBgn0000233	25.3320484772135	-0.180372410156411	0.344895404889194	-0.522977133355431	0.600990166136288	0.712577126152413
FBgn0000239	2084.8761118621	-0.522521207328689	0.321121529053976	-1.62717588219026	0.103699748442176	0.226069913284334
FBgn0000241	153.166411726633	-0.12837332397183	0.223415030364128	-0.574595736744315	0.565564736014781	0.684496998829465
FBgn0000244	2064.69025657775	-0.678209956805804	0.233893207239441	-2.89965649199682	0.0037357181233326	0.0529393241808456
FBgn0000246	137.431266304568	-0.275194270725051	0.473313364161301	-0.581420875813823	0.560956831179306	0.681110165341583
FBgn0000247	1381.72695739282	-0.679098393471548	0.333515504679092	-2.03618237816253	0.0417320450876375	0.141868090909525
FBgn0000250	2689.57126776352	-0.0711560561453248	0.156438342045428	-0.454850487514511	0.649216805422079	0.749885741394045
FBgn0000251	1258.98247883285	-0.305047668090498	0.239181186129971	-1.27538320645645	0.202173639773018	0.339723919690019
FBgn0000253	19564.5591896243	-0.600482495519647	0.320645448362724	-1.87273045223572	0.0611056160087119	0.170484064831255
FBgn0000256	6880.61073390781	-0.353178103121298	0.19498398993987	-1.81131847404606	0.0700915676065152	0.183166993112828
FBgn0000257	435.192360048555	-0.292288856685245	0.201388600912429	-1.4513674327195	0.146677573291065	0.277354722339097
FBgn0000259	2252.38876811773	-0.278625111685774	0.219780283620541	-1.26774388992432	0.204889425622549	0.342887867524322
FBgn0000261	17232.619081856	-0.147362422813942	0.127055038224711	-1.15983139962789	0.246117457239048	0.386752661148479
FBgn0000273	3546.86408147485	-0.786527055685783	0.43013092493988	-1.82857592905164	0.0674631614052744	0.179328565958401
FBgn0000274	1875.14359046269	0.647453750986409	0.317105843781585	2.04175912769479	0.0411754303995311	0.141298546518214
FBgn0000276	1070.68794300901	0.909676711537644	0.411618284925315	2.2100007333316	0.0271051113982907	0.116554049239126
FBgn0000277	106.10187661539	1.03898951145607	0.546156214852737	1.90236691115237	0.0571232037027894	0.164705862460177
FBgn0000278	6.54666137020702	-1.0719885443619	1.0114663190503	-1.05983612520921	0.289219158879924	NA
FBgn0000279	54.016172899482	-0.767555846695484	0.824660300886626	-0.930753967264162	0.351980846443778	0.49440192675662
FBgn0000280	0.0783871076844186	0	3.81693625648277	0	1	NA
FBgn0000281	0.525892543760648	-1.10880079672354	2.81273523822827	-0.394207311677857	0.693427987936215	NA
FBgn0000283	1295.32056442426	-0.502682753469599	0.337752377091059	-1.488317440721	0.136667197601128	0.265710398641862
FBgn0000286	2010.21361217905	-0.682153536688436	0.25649547022651	-2.65951494615491	0.00782532579246695	0.0703691754197676
FBgn0000287	830.542692684859	-0.408626950375856	0.220860125712509	-1.85016172139538	0.0642902442137362	0.17495552102288
FBgn0000289	1885.77498657452	-0.381176140594339	0.222005108159972	-1.71697013529829	0.0859846288135663	0.204137952782469
FBgn0000299	3361.52958431464	-0.262093486537644	0.43924777730417	-0.59668710937187	0.550716300570932	0.672519145691644
FBgn0000303	465.543163587415	-0.705118217650549	0.291968090827573	-2.41505232867029	0.0157329492089063	0.0915161403146079
FBgn0000307	864.822148997251	-0.475341011555718	0.49986396778671	-0.950940740258646	0.341634459057094	0.48410916241868
FBgn0000308	6670.16865609458	-0.0912059666470089	0.198147431335642	-0.460293459431806	0.645305595238557	0.747363157070132
FBgn0000316	428.044690850574	-0.309089251113546	0.328970107307923	-0.939566374716936	0.347440030882776	0.489719255678582
FBgn0000317	833.464407181312	-0.719834374494359	0.381985794165343	-1.88445325844442	0.0595036916311759	0.168282664261725
FBgn0000318	2980.11320237584	0.529984121080916	0.12934720248468	4.09737598417475	4.17859902369646e-05	0.0107938948114073
FBgn0000319	5901.99532994765	-0.554246215892289	0.286748471099438	-1.93286546138232	0.0532527736286744	0.158937933797951
FBgn0000320	496.404403630724	-0.375136369273355	0.206074061577492	-1.82039586351477	0.0686987419169392	0.181116114871674
FBgn0000326	404.712035838093	0.300226521495077	0.170461596806363	1.76125606658561	0.0781950723515429	0.193927312341722
FBgn0000330	207.502068222147	-0.39023524676387	0.226288169800985	-1.72450573579288	0.0846165843947754	0.202385418085833
FBgn0000337	8.09229464154649	-0.618228535826007	0.579676409636994	-1.06650628790148	0.2861948377906	NA
FBgn0000339	1006.99060161747	0.33339939802714	0.132574052582507	2.51481637268085	0.0119094395325668	0.0822731811232488
FBgn0000346	2363.52701313403	-0.612203169926729	0.199817726123227	-3.06380811054364	0.00218539036412563	0.0449147155335274
FBgn0000351	51.2151216649629	0.586040889074374	0.678992424581606	0.86310372230661	NA	NA
FBgn0000352	390.150943581456	-0.491240713459546	0.452409054336653	-1.0858330724168	0.277552851503976	0.419561820506411
FBgn0000355	210.311424236677	1.52948944850647	0.391525983436497	3.90648261727575	9.36493769091702e-05	0.015833499859486
FBgn0000356	1.68682656657019	1.13555077996571	1.94358131423845	0.584256893008182	0.559047489494465	NA
FBgn0000357	27.3183600028083	1.0861642994115	0.630165535707016	1.7236174272731	0.0847769303431728	0.202548291683163
FBgn0000358	1.58472493174498	0.587966471850792	2.56932085498999	0.228841201638509	0.81899234209714	NA
FBgn0000359	0.359047485198135	2.29049492827086	3.74527409225679	0.611569372988313	0.540822706701893	NA
FBgn0000360	1.56454444013411	0.0888512124632892	1.63516494523398	0.0543377674052176	0.95666605994855	NA
FBgn0000370	13718.3512803672	-0.391331236373423	0.231572344807926	-1.68988761027577	0.0910494583670661	0.211065557720874
FBgn0000376	364.462530709217	-0.413219332310251	0.364378874474528	-1.13403756709594	0.256778790169405	0.398445675110923
FBgn0000377	444.381960447242	0.204241310456561	0.154796548833071	1.31941772601669	0.187029498898072	0.322756958145559
FBgn0000382	3674.60867394861	-0.809506821761698	0.327581746876437	-2.47115973182426	0.0134675648839299	0.0866740106403971
FBgn0000384	522.710748980156	-0.369014608148146	0.446961908963836	-0.825606390046993	0.409027409109484	0.548269449882244
FBgn0000392	0	NA	NA	NA	NA	NA
FBgn0000394	505.657375237763	-0.306747004450572	0.213570251768564	-1.43628151350863	0.150922252229307	0.282780257210693
FBgn0000395	475.17231861369	-0.472077050361052	0.279520825250578	-1.68887971026079	0.0912424842719841	0.211292441873438
FBgn0000404	1273.33620776131	0.380443596495655	0.557736554867429	0.682120605464141	0.495162692268706	0.625441319872977
FBgn0000405	2688.92837518608	0.561070715552581	0.535674956498214	1.04740889740372	0.294911029864743	0.437665642383477
FBgn0000406	8478.93907094571	-0.422167397657592	0.235317737420702	-1.79403134793379	0.072808165466428	0.186573579430991
FBgn0000409	7167.5058515994	0.257608672762453	0.256066890947552	1.0060210119676	0.314405462617984	0.457729435159237
FBgn0000411	296.822263788533	-0.56869105947011	0.220184061612287	-2.58279847917192	0.00980025486402655	0.0764589654356279
FBgn0000412	2523.89548718891	-0.0923259518829075	0.140867436968748	-0.655410177608259	0.512203700476892	0.640266775793015
FBgn0000413	1533.35673411256	-0.679479416258838	0.296981656370026	-2.287950793204	0.0221403868535053	0.10668245753867
FBgn0000414	1713.52842747959	-0.831065482834194	0.452683166497446	-1.83586566574678	0.0663775267326061	0.177843713072067
FBgn0000416	16634.7890263307	-0.385254690041735	0.241735743184665	-1.59370180415329	0.111002839962267	0.235104728884712
FBgn0000422	1438.50132846248	-0.135004990554046	0.166767935885233	-0.809538055606532	0.418205722312747	0.556059970301587
FBgn0000426	345.969051891718	1.21791659600882	0.287208954097286	4.24052446358019	2.2299812806637e-05	0.00864052158572459
FBgn0000427	52.8956413637024	0.16190479667423	0.425317921614331	0.380667703960619	0.703449836231666	0.791801789346887
FBgn0000439	96.2462555670372	-0.789606218052432	0.31403851404538	-2.51436108227901	0.011924827193041	0.0823363068349695
FBgn0000442	423.23890897737	-0.117972871002196	0.261948679808464	-0.450366350723575	0.652446303727728	0.75237207741401
FBgn0000447	3474.95685260795	0.475435089512854	0.241823271087057	1.96604357957633	0.0492935768048927	0.152942435428087
FBgn0000448	230.019298158114	-0.361626316957024	0.219702690111291	-1.64598037818218	0.0997677988700951	0.220897644086493
FBgn0000449	2.67128514307026	0.161040332053666	1.25961431725432	0.127848921568865	0.898268533888896	NA
FBgn0000451	186.569780229819	-0.0561131847194818	0.188885921414243	-0.297074468543479	0.766409656085001	0.839210179180789
FBgn0000454	3060.10557378505	-0.124812123536058	0.135413683437207	-0.921709832920505	0.356679950223881	0.498557205755905
FBgn0000455	1011.72694776429	0.212381297443719	0.159204862559323	1.33401263020205	0.182199717286742	0.317625919747987
FBgn0000459	187.030996101437	-0.349666657220282	0.244609602182475	-1.42948867951405	0.152863826365465	0.285083245829366
FBgn0000463	281.008983020135	-0.416716521705414	0.398185907247719	-1.04653759492841	0.295312896930398	0.438134188465662
FBgn0000464	1683.97808901679	-0.861760645989555	0.371135079343258	-2.32195956123168	0.0202351131843843	0.102332967789282
FBgn0000473	1162.17248354864	0.242039565086257	0.209878319972416	1.15323757650656	0.248812884062744	0.389641517729397
FBgn0000477	927.541567166085	0.0557593638521	0.151022780597309	0.369211609212642	0.711970003349635	0.798168029247917
FBgn0000479	2906.64018312091	-0.543081664504434	0.32982370237971	-1.64658167556197	0.0996440594771923	0.220829215304401
FBgn0000482	383.328943191574	0.0899987514089152	0.192495808183278	0.467536162258797	0.64011632586441	0.742986491785282
FBgn0000489	3686.49160326754	-0.681766834368305	0.262659788723385	-2.59562698074921	0.00944185075730814	0.0749318926968539
FBgn0000490	425.715702384017	-0.22832613671626	0.185779163998931	-1.22901907728239	0.219064653428422	0.358905328226096
FBgn0000492	314.788901836889	-0.199557974538882	0.252751458707258	-0.789542325728035	0.429795101878361	0.56723308677074
FBgn0000497	244.535303487238	-0.565460961402441	0.340421801257185	-1.66105977735322	0.0967014416852498	0.217359630227176
FBgn0000499	1149.57594109072	-0.263986612903659	0.150623229303902	-1.75262882175386	0.0796657406796366	0.195955058750105
FBgn0000500	482.073388138912	1.02789990440215	0.379485189819675	2.70866935516137	0.00675536253343941	0.0661451309688119
FBgn0000504	1821.98720012907	-0.771767121736246	0.256524872581869	-3.00854694505282	0.00262500243327059	0.0472075844540266
FBgn0000520	217.959408496319	0.383459058289973	0.205619906170857	1.8648926819923	0.0621964484109116	0.172246376154162
FBgn0000524	262.538738454047	-0.322453376330335	0.487184557620061	-0.661871094407318	0.508053838206003	0.636469672786536
FBgn0000527	313.924308543209	-0.375875211136963	0.245188684118731	-1.53300390875685	0.125274891830663	0.251926640967356
FBgn0000529	16.5474796734636	0.188385731000643	0.485212808314657	0.388253829603105	0.697828201108061	NA
FBgn0000533	186.347806890833	0.00401266315359073	0.195775310820719	0.0204962675669831	0.983647489502293	0.988298659754668
FBgn0000535	733.390579021524	-0.641433187259309	0.292981501306301	-2.18932998977541	0.0285728641308041	0.119625483535029
FBgn0000536	3274.33030160681	-0.500216776671005	0.236359778978646	-2.11633628543966	0.0343162167659744	0.130121200232172
FBgn0000541	2802.31311978762	-0.614518246992039	0.47582895015242	-1.29146880784617	0.196541164434801	0.332977533470173
FBgn0000542	243.205943165511	-0.882603967603512	0.484026614920963	-1.82346164528088	0.068233501061186	0.180467404734002
FBgn0000543	569.977347634963	0.0565571150605152	0.11429059402525	0.494853627657409	0.620703446198953	0.72912592066206
FBgn0000546	841.828893566344	-0.978782490436921	0.483849824030649	-2.02290554181316	0.0430828870878659	0.143316685112894
FBgn0000547	1239.11961819754	-0.781414506820885	0.452170721978403	-1.72814043200746	0.0839630502005078	0.202010947546042
FBgn0000551	25.1763223327659	1.45864508714025	0.667015903444096	2.18682205268064	0.0287555169379797	0.120109442023128
FBgn0000552	0.814259333295386	1.25900911004665	2.63866516419017	0.477138640829804	0.633263400636337	NA
FBgn0000556	116740.242045554	-0.0996838856218673	0.138825913058015	-0.718049558803982	0.472726729969092	0.605751699079947
FBgn0000557	5116.0525452315	-0.356911018430654	0.169796055461945	-2.10199829118319	0.0355534254939004	0.131975437434952
FBgn0000559	63780.2901239645	0.0295096739755058	0.111001747777429	0.265848732712533	0.790355709940284	0.855769386270511
FBgn0000560	90.6043639434322	-0.336963518650253	0.373834598228028	-0.901370606807011	0.367391304099361	0.509153486240794
FBgn0000562	1569.22777502247	-0.716940217408428	0.347202836107098	-2.06490311383079	0.038932168420822	0.137615343916262
FBgn0000564	2.95405503531649	-0.492763430832899	0.982108816218925	-0.501740156177415	0.615850313661125	NA
FBgn0000565	1338.26606699882	0.132509595554453	0.117762357835681	1.12522879118427	0.260492095733096	0.40240652781283
FBgn0000566	1484.12613548357	0.390643691129126	0.196141559100591	1.99164161292705	0.0464103941629569	0.148184811609984
FBgn0000567	699.756655004988	-0.808783197579561	0.382323483421586	-2.11544211289716	0.0343922837232135	0.130196325519393
FBgn0000568	2998.46572309028	-0.904836795139054	0.351368074000257	-2.57518215823556	0.0100187307156706	0.0770460680468618
FBgn0000575	1518.29564095278	-0.622583892097412	0.335080191158596	-1.8580146141875	0.0631669390076054	0.173403053654135
FBgn0000576	58.1696789328181	-0.552892473670869	0.344248851599903	-1.6060837127017	0.108255517986282	0.231474693960214
FBgn0000577	106.006655992074	-0.651034465646382	0.368779315776567	-1.7653768467883	0.0775004519784712	0.192967483342351
FBgn0000578	810.318115037488	-0.781860223503541	0.383784885081986	-2.03723558142868	0.0416264397846747	0.141868090909525
FBgn0000579	23384.7447370173	-0.0609417989164078	0.120914796840337	-0.504006130836731	0.614257068739422	0.72392014026517
FBgn0000581	2206.20398402976	-0.695874382466355	0.421507761197521	-1.65091712781123	0.0987554979378836	0.219764346255689
FBgn0000588	137.392325831047	-0.19494823707166	0.461977208487525	-0.421986698672657	0.673034726254701	0.768599123065138
FBgn0000591	0.674591929350861	1.39624654854928	2.51717693156786	0.554687487811834	0.579108435928982	NA
FBgn0000592	16153.901094727	-0.387906160085081	0.190256551868216	-2.03885835350243	0.0414641664125816	0.141729646503087
FBgn0000594	56.8582789832619	-0.636230542181376	0.361481684177943	-1.76006301295251	0.0783971231497365	0.194111886736861
FBgn0000606	6.86428571778412	-0.491921706631379	0.789497886326	-0.623081727198258	0.533230816870566	NA
FBgn0000611	1975.07654602649	-0.711642658481158	0.395202923957031	-1.80070190613907	0.0717498770176746	0.185396183086772
FBgn0000615	24765.3577930013	-0.561910010996092	0.201669753289821	-2.78628798731442	0.00533154817227732	0.0598787856961478
FBgn0000617	223.874544568095	0.350141712076693	0.190875064837838	1.83440258356514	0.0665942563997982	0.178040042630518
FBgn0000618	164.025365741432	1.0049801317994	0.310175063555151	3.24004167285585	0.00119512231749926	0.0371597150143604
FBgn0000625	135.188723716923	-0.296573229822919	0.193968320069848	-1.52897766870447	0.126269980041628	0.253193412034764
FBgn0000629	535.441359404384	0.13241278473531	0.141645395417732	0.934818843526867	0.349881666801802	0.492030431089554
FBgn0000633	472.029791577497	-0.562549357125542	0.229775858744996	-2.44825265890902	0.0143550952862598	0.0885903359857383
FBgn0000635	1856.29633700613	-0.711765249797213	0.307597547484093	-2.31394969049297	0.0206704819529767	0.103224790461935
FBgn0000636	1022.82585534315	-0.354971680408363	0.201747318760771	-1.75948648333356	0.0784949140775286	0.194305148075416
FBgn0000639	23.9150858205392	1.32019515151099	1.0606530530951	1.24470027937837	0.213241943248445	0.35208038104462
FBgn0000640	16.7681232130876	1.16538070181224	0.803452624255227	1.45046598471504	0.146928618089052	NA
FBgn0000644	14.3737644215409	0.7518793483212	0.551175209492141	1.3641385450082	0.17252396548431	NA
FBgn0000658	28.9149401228932	-0.678293349601104	0.527406066853882	-1.286093187451	0.19841054140239	0.334895640286366
FBgn0000659	1082.54581616505	-1.02570173498679	0.412128227185328	-2.48879272839893	0.0128177668822309	0.0849289808598723
FBgn0000662	989.687593139759	-0.310260837907432	0.236201543950077	-1.31354280212922	0.189000107959959	0.324838541717482
FBgn0000667	6190.65850929929	-0.563138712635973	0.256552151031175	-2.19502627583716	0.0281617129501965	0.118796800001886
FBgn0000709	578.874780272486	-0.477046994125772	0.369602801359036	-1.29070178140334	0.196807106722349	0.333128205571145
FBgn0000711	1761.36857578442	-0.68494476259505	0.336186724036866	-2.03739384580796	0.0416105900945337	0.141868090909525
FBgn0000715	416.345768591566	0.586847269764373	0.320004760227962	1.83387043788449	0.0666732287341398	0.178092683565198
FBgn0000719	695.292448699564	-0.269636048817109	0.230085571138106	-1.17189464547198	0.24123935710031	0.381439666130148
FBgn0000721	3772.42369140092	-0.623170764326618	0.34709678593808	-1.795380394095	0.0725931140149911	0.186312426267971
FBgn0000723	1960.31698444469	-0.773638022967319	0.299674597998453	-2.58159359563507	0.00983453201547726	0.0765269490678662
FBgn0000808	13.7296826714848	0.083181601637867	0.7516214188793	0.110669546594207	0.911878395897522	NA
FBgn0000810	407.009705045551	-0.305483081656455	0.282727995414968	-1.08048402213615	0.279926698067667	0.422036429428181
FBgn0000826	38.7826664047902	0.532643054967928	0.675188002351684	0.788881101430608	0.43018150229817	0.567629318036467
FBgn0000927	119.782318105344	0.671227579338397	1.15355875393552	0.58187550226498	0.560650542691314	0.680801018473165
FBgn0000928	65.1352613303937	-0.0907357313896686	0.335767647967802	-0.270233692670622	0.786980473588194	0.853581269266388
FBgn0000964	86.7292100701176	-0.533433599942511	0.530262786817489	-1.00597970139306	0.314425334560197	0.457729435159237
FBgn0000996	275.939635426126	0.305853066240715	0.58556661316753	0.522319851171588	0.601447649875272	0.71286291852963
FBgn0001075	207.085444111884	-0.782259253663465	0.533502268924339	-1.46627165286602	0.142574294891185	0.272846275551492
FBgn0001077	68.5728427066911	0.262538347888319	0.49344596912613	0.532050851186933	0.594690776473269	0.706963953441539
FBgn0001078	1029.60095178832	-0.712971412630275	0.407704505319705	-1.74874548435807	0.0803350239588814	0.196880010912215
FBgn0001079	190.007240516049	-0.305457375287205	0.332294505638392	-0.919236912149273	0.357971668002864	0.499938381667521
FBgn0001083	149.151945837295	-0.629746883648576	0.367577533677306	-1.71323551074649	0.0866692211281043	0.20498748997157
FBgn0001084	78.2427227483327	0.169863523332573	0.314986875742411	0.53927174880608	0.589699359394448	0.703437971946462
FBgn0001085	203.86734252777	-0.19686769600386	0.415508305336513	-0.47379966531456	0.635642773280516	0.739748930671158
FBgn0001086	526.209568957474	-0.0900838221191334	0.267310362256902	-0.337000860567302	0.736116251373589	0.817052447181368
FBgn0001087	801.723917111839	-0.61963266666334	0.366490761078302	-1.69071838220487	0.0908906017692318	0.210919990788772
FBgn0001089	1091.55485950677	-0.380617772954481	0.260021987739929	-1.46379072117228	0.143251138475222	0.273220480893438
FBgn0001090	2234.24549625446	-0.250939694287253	0.214559997517391	-1.16955488996458	0.242180139820557	0.382445124369354
FBgn0001091	15792.3296258835	0.268644998731846	0.21164272703415	1.26933253269081	0.204322487912231	0.342354190645707
FBgn0001092	11501.300797909	-0.173379907510741	0.178540656442349	-0.971094824929834	0.331501060611757	0.474179932248442
FBgn0001098	9017.74929878801	-0.0854926058494168	0.156137342860862	-0.547547462272376	0.584002672417648	0.699422836948191
FBgn0001099	282.692708341972	1.07143007961994	0.396472299471288	2.70240841806283	0.00688391457118543	0.066830280442739
FBgn0001104	706.733284905935	-0.127265055298701	0.280345065117507	-0.453958607209147	0.649858619594984	0.750260206714507
FBgn0001105	3289.95881635354	-0.57424951813704	0.338406661561181	-1.69692143614383	0.0897115147304505	0.208932877398618
FBgn0001108	1479.5427679601	-0.323998385914415	0.246409790672557	-1.31487626782234	0.188551489861014	0.324406076456707
FBgn0001112	1944.07997430134	-1.01060419537893	0.327447331426591	-3.08631067773869	0.00202656955406486	0.0431309003315839
FBgn0001114	2328.87763831025	-0.158733392461499	0.311693462888736	-0.509261217705299	0.610569138142368	0.721079141720086
FBgn0001120	160.99256189452	1.51671743316808	1.58937407362731	0.954286003738936	0.339938890791078	0.482558766572811
FBgn0001122	1804.76225186207	-0.655801397694956	0.357988310311963	-1.83190729642392	0.0669652333125726	0.178559610342873
FBgn0001123	1425.08362719045	-0.447258299012921	0.181717766596205	-2.46127996943069	0.0138442286349659	0.0876684148544331
FBgn0001124	8603.37615192125	-0.2069210629059	0.152054265585691	-1.36083694928827	0.173565222350689	0.308312372810637
FBgn0001125	8281.92028802493	0.148549646393466	0.181233674050672	0.819658086012932	0.412411050330187	0.551304229025863
FBgn0001128	16661.3305186605	-0.31874626050201	0.191656149955009	-1.66311522263613	0.096289373301749	0.217019185878843
FBgn0001133	379.096371004355	-0.0199555145941706	0.137044251305641	-0.145613656932352	0.884226386231254	0.922019820501072
FBgn0001134	32.3950140846379	-0.545955192646268	0.41360062783279	-1.32000571543375	0.186833109758938	0.32250254035171
FBgn0001137	491.393777640188	-0.156483377548228	0.211002531029871	-0.741618485733117	0.45831852016656	0.592996286061114
FBgn0001138	112.501403773856	-0.811797418713694	0.319173872170827	-2.54343318640821	0.0109769047876429	0.0798132864792258
FBgn0001139	1628.33393277681	-0.456187635085942	0.27485611060447	-1.65973255636443	0.0969682668456472	0.217662284447871
FBgn0001142	2459.88819827554	-0.189888412033037	0.377955751955432	-0.502409107549258	0.615379773866405	0.724636424742735
FBgn0001145	10319.3889219711	-0.295580549650925	0.12474701023648	-2.36943994962764	0.0178150478158595	0.0962572632562826
FBgn0001147	160.892822279314	-0.467174619737097	0.179507740416698	-2.60253189446108	0.00925382072652606	0.0741641216162048
FBgn0001148	32.0738954101422	0.0658852678266376	0.416982729576447	0.158004788096526	0.874453025757832	0.915742779120325
FBgn0001149	11813.4489368687	0.627538861282356	0.207085524451209	3.03033668309448	0.00244281259895162	0.0460705045286419
FBgn0001150	31.7130661705824	-0.395394063574405	0.76963565950621	-0.513741870832864	0.607432473755793	0.717973943612268
FBgn0001168	2463.66008553576	-0.47598073647846	0.254794132955218	-1.86809928061459	0.0617482338167816	0.171557264110302
FBgn0001169	688.41684369765	-0.644412935633129	0.335050403153397	-1.92333132438613	0.0544384530476204	0.160441203679944
FBgn0001170	14.7306283385184	-0.585879219582448	0.544873077104943	-1.07525815497323	0.282259165142885	NA
FBgn0001174	1.37747846194615	-0.0828892852175348	1.66945593024043	-0.0496504781684159	0.960400920444679	NA
FBgn0001179	304.087516417996	0.168864973087787	0.153772743544445	1.09814632421499	0.272140600021415	0.413897513816915
FBgn0001180	184.367416247531	-0.478124790954116	0.433288688214685	-1.1034785905078	0.269819383969696	0.411713430727807
FBgn0001185	283.111477314719	-0.483340808804916	0.263120525968314	-1.83695592362537	0.0662164024523053	0.177556459577991
FBgn0001186	5226.43298536992	-0.507369845621294	0.221082876189459	-2.29493054535124	0.0217371049654863	0.105923073524193
FBgn0001187	4537.35779331624	0.118109208137535	0.205092795721795	0.575881798879704	0.564695078909875	0.68386253843356
FBgn0001189	855.545549825607	-0.219253935476388	0.141470689802312	-1.54981880545552	0.12118501206399	0.246905559686206
FBgn0001197	1701.25258977617	0.302474866958254	0.341830034873641	0.884869192580065	0.376227185489596	0.518562140786768
FBgn0001202	812.798984042553	-0.222641992068363	0.186990662080968	-1.19065834406189	0.233787737190115	0.373640622315004
FBgn0001206	233.363069517414	-0.197440607745674	0.358686552726737	-0.550454446214194	0.582007713464862	0.697604368773187
FBgn0001208	2065.53788616429	-0.0874194798968399	0.162856778988301	-0.536787479403112	0.591414421246509	0.704837522044773
FBgn0001215	8960.29714503683	-0.288731362298192	0.143220992848954	-2.01598492340225	0.0438015523412201	0.144332578925271
FBgn0001216	5240.28638720211	0.173933738156989	0.213470098464875	0.814792045386199	0.415191354983131	0.553149447739053
FBgn0001217	8077.52134513823	0.261061001475943	0.257049533019994	1.01560581888175	0.309817132808673	0.453093014558929
FBgn0001218	15314.3004748455	-0.229535322738749	0.149335360693054	-1.53704602629607	0.124282038726006	0.250597046969277
FBgn0001220	8199.03119661157	-0.113953567932695	0.0988512317959716	-1.15277843140988	0.249001339429275	0.389774672723535
FBgn0001222	1089.99884694098	-0.329740850301966	0.275713081805595	-1.1959564926791	0.23171353770716	0.372131433104246
FBgn0001223	0	NA	NA	NA	NA	NA
FBgn0001224	2358.11515628204	-0.407436739571562	0.521065325972761	-0.781930248018193	0.434255567346221	0.571459678775258
FBgn0001225	9626.52757352806	-0.591293497715429	0.60817405365691	-0.972243873542485	0.330929238718325	0.473920269801168
FBgn0001226	4278.62891638689	-0.738999344942448	0.655752675998052	-1.12694827179728	0.259764352310177	0.401611967766022
FBgn0001227	284.495488664469	-0.0461828017052736	0.139590968442721	-0.330843766043675	0.740762500182529	0.820757374045806
FBgn0001228	297.892824640398	-0.361169902253566	0.18878798192041	-1.91309795559883	0.0557355134397056	0.162521372405869
FBgn0001229	432.161585678522	-0.45117655855767	0.644011927131146	-0.700571743395356	0.483570317658903	0.615572071198994
FBgn0001230	8931.5278293927	-0.996837602330637	0.663044572622357	-1.5034247220939	0.132729555439225	0.261215889357089
FBgn0001233	40247.5324125547	-0.522383447185066	0.335618921420762	-1.55647793924634	0.119594484538667	0.245105435487305
FBgn0001234	14202.5581490891	-0.657242680318996	0.478685832024961	-1.37301469220155	0.16974777926878	0.304123686907985
FBgn0001235	1646.73207316177	-0.9721752130655	0.491381775810545	-1.97845191035397	0.04787774856852	0.150822921961187
FBgn0001247	1804.17995706333	-0.212564872680771	0.156266880838518	-1.36026822536011	0.173745059572058	0.308426729915625
FBgn0001248	14368.6574144712	0.0359664528638516	0.189761368778768	0.189535167749463	0.849673394705337	0.899541178936081
FBgn0001250	2329.5712817986	-0.826375404878903	0.316153092900434	-2.61384570777916	0.00895294573753202	0.0734076276808633
FBgn0001253	10.0624051965761	-0.230517378559191	0.617248846110034	-0.373459391640722	0.708806563367638	NA
FBgn0001254	1.33995876651174	-1.52066580509753	2.36224805456316	-0.643736716032025	0.519746176837687	NA
FBgn0001255	33.7442581481844	0.669233745549271	0.294287849342659	2.27407875331624	0.0229612519036681	0.108225357611178
FBgn0001256	4.15582278328424	-1.58321750324798	0.941546962089938	-1.68150667677132	0.0926645406622809	NA
FBgn0001257	3442.79532006303	-0.552528862414909	0.309535392198672	-1.78502645041726	0.0742570266335918	0.188707960816153
FBgn0001258	813.965702826047	0.20330265776487	0.171910860763758	1.18260508301596	0.236965697079273	0.376663379985803
FBgn0001259	45.3880686143656	-0.211288903123655	0.39537095134182	-0.534406744872321	0.593060153480338	0.706161827725051
FBgn0001263	3114.46294108506	0.244948968259821	0.297332537943173	0.823821603764862	0.410040930401125	0.549027260606202
FBgn0001269	349.232393690728	0.0180903859871535	0.250688944158809	0.0721626797219004	0.942472444978057	0.961756437097115
FBgn0001276	112.459648686895	0.340019950873266	0.251470529908317	1.35212643404869	0.176334872347228	0.311357138225758
FBgn0001280	2015.07066257897	0.549359195594565	0.188689422867865	2.91144668972393	0.00359759292711383	0.0524487488193922
FBgn0001281	4242.44015286257	0.514518300822773	0.24305678445963	2.11686459181406	0.0342713415190449	0.130112359149816
FBgn0001285	621.976493225403	1.29890174639097	0.508656091116921	2.55359518754372	0.0106617131984031	0.0788643513058743
FBgn0001291	1631.85626909962	0.247990535304314	0.152143440777564	1.62997848633435	0.103106043965859	0.225297565633808
FBgn0001296	602.863540533583	-0.190759994699898	0.159781228435134	-1.19388238886485	0.232523977400526	0.372545550388609
FBgn0001297	6535.50739280273	-0.483646743805013	0.266277696825094	-1.81632464743264	0.0693205865381199	0.1820632789181
FBgn0001301	1101.47821602726	-0.685393428699892	0.306850987633668	-2.23363605242211	0.0255070297367334	0.113659441506961
FBgn0001308	2039.24753387502	-0.4178833805454	0.251362674142279	-1.66247189234176	0.0964181945459898	0.217019185878843
FBgn0001311	160.674149456164	-0.128902029342561	0.318560265592734	-0.404639383077852	0.685742605186278	0.778388168251251
FBgn0001313	303.934731485343	-0.781277974823655	0.370916315525774	-2.10634566914694	0.0351743370038426	0.131301728315251
FBgn0001316	2743.25011716682	-0.618784864429456	0.391127220177241	-1.58205523039039	0.113636962679672	0.237977555182743
FBgn0001319	68.7054454263183	-0.936469966265998	0.332757316997797	-2.81427310063387	0.00488876761119406	0.0583904120669723
FBgn0001320	187.869398229081	-0.494276701920029	0.289096090097297	-1.70973153512272	0.0873155285041837	0.205703643153454
FBgn0001321	87.7403344557628	-0.562611611631588	0.239911257930375	-2.34508216281732	0.0190228870762326	0.0991937643563056
FBgn0001323	224.108085220056	-1.00769245172968	0.352895246132119	-2.85550021649318	0.00429690935802432	0.0556775182143876
FBgn0001324	1255.04388074942	-0.0644128505141697	0.228469733328448	-0.281931657098622	0.777995914880735	0.847331198961541
FBgn0001325	38.6241275480041	-0.534734187905102	0.373241650180619	-1.43267555388401	0.151950578824927	0.284023400317763
FBgn0001330	188.263448909344	-0.129183546366963	0.292037059923061	-0.442353262976272	0.658233593763079	0.757011729745508
FBgn0001332	791.958177482017	-0.357689387314015	0.238553684713475	-1.49940835222743	0.133767728148744	0.262411564780261
FBgn0001341	270.003131577103	-0.225384835559912	0.255260914869318	-0.882958660848252	0.377258607348775	0.519548912106708
FBgn0001404	2064.38511637966	-0.423962175710404	0.212798058354775	-1.9923216357716	0.0463357793016054	0.148119277287536
FBgn0001491	685.197134613759	0.118885616625389	0.254275507910385	0.467546471944471	0.64010895160841	0.742986491785282
FBgn0001565	1765.84700739975	0.140666171414847	0.104030174792197	1.35216701976933	0.176321891505486	0.311357138225758
FBgn0001612	344.731286745493	-0.39409348161969	0.33738774669502	-1.16807289381475	0.242777363031877	0.383043438041932
FBgn0001624	3172.46842151626	-0.698750351075049	0.325552490826767	-2.14635234183132	0.0318448785600436	0.126021156548517
FBgn0001941	1899.02925165318	-0.41951452555558	0.25192415390786	-1.66524137939157	0.095864608520164	0.216587266788654
FBgn0001942	22997.6005682541	0.0490294559461033	0.0990758968341517	0.49486764705422	0.620693549443421	0.72912592066206
FBgn0001961	2062.86350249599	0.229883844672075	0.237618305090018	0.967450064863428	0.333319092644799	0.476056561849802
FBgn0001965	913.980430863309	-0.876362585698476	0.371322114422599	-2.36011417488885	0.0182693112739933	0.0974313538300467
FBgn0001967	5.91448041949365	1.23110915368798	0.723505689229949	1.70158876704659	0.0888324847043409	NA
FBgn0001970	199.600502109085	0.103028029195037	0.171507718405383	0.600719490370196	0.548026835240333	0.670228882979591
FBgn0001974	346.526514268499	-0.168640159615324	0.249204935887104	-0.676712758577634	0.498588219867639	0.627954226437502
FBgn0001977	973.949204452367	0.274825394937267	0.117587085071497	2.33720731124651	0.0194284072006926	0.100099797422659
FBgn0001978	1964.05216360571	-0.206863521280492	0.190978898309017	-1.08317475444734	0.278730863078282	0.420794230855187
FBgn0001981	145.350025580188	-0.640166377545988	0.270063603965018	-2.3704281811662	0.0177674954226023	0.0961268930995327
FBgn0001983	2.79111202375383	-1.2659860592843	1.29051413821148	-0.980993560472593	0.326595917118595	NA
FBgn0001986	599.176542733942	-0.372772699298979	0.236885881074382	-1.57363831735471	0.115571089485878	0.240260933073529
FBgn0001987	590.407002291785	-0.70034864213603	0.389543381711222	-1.79787072510249	0.0721974962766985	0.185796054863143
FBgn0001989	2366.92455760045	0.713005021133834	0.263998968163331	2.7007871511555	0.0069175593272533	0.0669103719362959
FBgn0001990	233.410305373613	-0.261569145424822	0.243663553329368	-1.07348490100713	0.283053609631697	0.425155494469205
FBgn0001991	2527.14609697161	-0.765384692041651	0.31665817775641	-2.41706908523432	0.0156460472446313	0.0912545216463573
FBgn0001992	4.2046991927632	0.142960570046716	0.845663796836719	0.169051306892257	0.865756285043009	NA
FBgn0001994	1230.79195684821	-0.46690740491848	0.313491740077212	-1.48937705600627	0.136388106900012	0.265559698536913
FBgn0001995	546.157916020686	0.472660333952357	0.218252738081618	2.16565591848658	0.0303374899090917	0.123173699286868
FBgn0002021	626.060246091919	0.137005194259272	0.149980049753516	0.913489457327375	0.360985175858412	0.503027153242937
FBgn0002022	1631.18699367919	-0.0357366553434117	0.121827211892052	-0.293338859097236	0.769263154074312	0.840948700670067
FBgn0002023	452.126633946403	-0.0866149552375238	0.155321045959474	-0.55765111999132	0.577082641668542	0.69349785756381
FBgn0002031	3027.94356290596	0.560966257169494	0.212976257571814	2.633937996494	0.00844008990412386	0.0725528266060356
FBgn0002036	2611.70449617821	0.0814449293904717	0.143309466321736	0.568315070043064	0.569821047935141	0.687752861703853
FBgn0002044	1721.20463535837	-0.402753951557409	0.252741184837202	-1.59354302234847	0.11103842493427	0.235111132445171
FBgn0002069	1703.17575381863	0.144323236821512	0.158106237868484	0.912824432275486	0.361334886317839	0.503354741709972
FBgn0002121	1703.69040698741	-0.824096759130565	0.460336429159409	-1.79020539529186	0.0734208980749364	0.187487286535998
FBgn0002174	3108.99736599939	0.72054579154159	0.275267253235918	2.61762263062961	0.00885446663248703	0.0733917009993718
FBgn0002183	1343.30909912402	-0.122692382607509	0.212502154860263	-0.577370063320954	0.563689492875788	0.683106004888753
FBgn0002283	544.559466222655	-0.107490017868308	0.178741300308711	-0.601372025842137	0.547592226518963	0.66997525905174
FBgn0002284	2982.48412101043	0.470450015976685	0.221611651695369	2.1228577666276	0.0337657724136093	0.129311129586305
FBgn0002306	801.359711206941	-0.42888933610088	0.227992779053233	-1.88115315705126	0.0599510877234974	0.168933802070446
FBgn0002354	334.802581021479	0.591333135085397	0.276342136620081	2.13985873568883	0.0323661847606144	0.126931439109859
FBgn0002413	1746.22584209484	-0.34009123717479	0.25451919724719	-1.33621055249711	0.181480462896766	0.316762484391786
FBgn0002431	3553.65700052416	-0.687570535138726	0.390907832897128	-1.75890702942161	0.0785933010293408	0.19447561002264
FBgn0002440	4.53494962829624	0.0536359453140871	0.93463027890136	0.0573873397052095	0.954236647834036	NA
FBgn0002441	1111.53079310258	0.0194377697341525	0.152613089740878	0.127366333825991	0.898650460907374	0.931530503737016
FBgn0002466	259.354986049497	-0.274537763134571	0.510210741704597	-0.538086991695528	0.590516992685334	0.704024512365303
FBgn0002521	1531.38019700497	-0.457558174567347	0.418132613394757	-1.09428961030449	0.273827980576118	0.415838010438761
FBgn0002522	104.968170773946	0.00822624575825766	0.191445335825591	0.0429691625694757	0.965726115844486	0.977674314157785
FBgn0002524	880.306281254613	-0.380409221628824	0.254689788855527	-1.49361787662642	0.135275524263866	0.264017741726247
FBgn0002525	1388.09615982487	-0.436331336424124	0.313943494642713	-1.38984034983969	0.164577362357934	0.298642172410939
FBgn0002526	858.824777744643	-0.575606873998071	0.437005912690535	-1.3171603799459	0.187784871309407	0.323441568560629
FBgn0002531	14.5069116393614	0.482671149679234	0.443843152347449	1.08748134814388	0.276824137218824	NA
FBgn0002533	4.49132056897639	1.48127191168302	1.26329735970403	1.17254413642569	0.240978662812011	NA
FBgn0002534	3.65409487802343	0.225495587576589	0.971321170598823	0.232153477554258	0.816418810176362	NA
FBgn0002535	1.26531676080017	0.957920734601786	1.89343539923882	0.505916776979495	0.612915074187921	NA
FBgn0002542	650.132721854688	-0.436941656005022	0.394576649230078	-1.10736825622502	0.268134744569852	0.410077446594291
FBgn0002543	186.577326933457	-0.989739059266223	0.688046401033523	-1.43847719831035	0.150298702565928	0.282257321112408
FBgn0002552	474.097233589488	-0.307711230097707	0.275851661138565	-1.11549529492642	0.264638233574587	0.406665588371819
FBgn0002561	1.06889399305935	2.3179404129902	2.93320076444082	0.790242673154388	0.429386058956235	NA
FBgn0002562	12.0622096874889	0.79723428504304	0.885697046067722	0.90012074510417	0.368055997202537	NA
FBgn0002563	1015.95504493425	-0.410555155671281	0.717402112718158	-0.572280382776868	0.567132037702957	0.685952760255118
FBgn0002564	177.853471900508	0.0296516709046149	0.269982829937321	0.109827987622394	0.912545794393963	0.940836854657213
FBgn0002565	1859.13646022296	-0.116899210547779	0.964097684933251	-0.121252454367083	0.903491077989466	0.935517681477107
FBgn0002566	1511.38041064009	-0.368620071112406	0.288993991699401	-1.2755284943634	0.202122245221065	0.339723919690019
FBgn0002567	2002.5425032616	-0.318605068140374	0.168462608111724	-1.891250953025	0.0585908525622861	0.167253714334899
FBgn0002569	1172.32477494031	-0.334622291649052	0.171983598012392	-1.9456639791019	0.0516951162334217	0.156454260266164
FBgn0002570	15463.5681155346	-0.16928654396703	0.197330760670929	-0.857882184163542	0.390957522774005	0.531689316096289
FBgn0002571	1649.09344772821	0.500948210289784	0.237380485659786	2.1103175726405	0.0348310109711728	0.130727646633001
FBgn0002573	83.7012329699988	-0.36327794278243	0.234470656696761	-1.5493535434255	0.121296754970638	0.247011435588458
FBgn0002576	47.4648443854995	0.14051412620945	0.28805423951533	0.487804402552361	0.625688392706933	0.732760146281548
FBgn0002577	8.10965975627327	-0.404667337625425	0.623105671389634	-0.649436132916182	0.516056515312847	NA
FBgn0002578	584.150810901545	0.0147858183166858	0.268975353046769	0.0549709040222538	0.956161643957826	0.971125857489815
FBgn0002579	16337.2545928217	1.08118353692299	0.218691566519226	4.94387394142123	7.65852354124714e-07	0.0012051002059974
FBgn0002590	16842.6580038715	0.734452977373965	0.301261103483408	2.43792832490376	0.0147717025862778	0.0894259130007486
FBgn0002592	13.3430565066435	0.358222975495265	0.519234536889784	0.689905909651199	0.490253359237867	NA
FBgn0002593	30414.5607831464	0.970475722993978	0.304465091700653	3.18747780763038	0.00143519471059236	0.038365744785691
FBgn0002607	24012.5414034186	0.791388708737503	0.246668130118696	3.20831356834258	0.00133515840531197	0.0375093359515227
FBgn0002609	37.1719409894387	0.0241077590356425	0.475887432238348	0.050658532674946	0.959597620327524	0.97326499732041
FBgn0002622	17583.5517525712	0.740124405495071	0.223884005560674	3.30583868035402	0.000946925884857306	0.0345642463885319
FBgn0002626	14072.2651996873	1.01273413154904	0.381243983135533	2.65639374350207	0.00789813366814101	0.070734203225078
FBgn0002629	4.18126796070328	2.07428880105669	1.23994821543357	1.67288341177327	0.0943502499868686	NA
FBgn0002631	1.13842643253369	0.151525011399036	2.08412324236625	0.0727044391228033	0.942041315991522	NA
FBgn0002632	1.4448215213585	-2.66000247927763	2.05148832927707	-1.29662081978063	0.194761685285773	NA
FBgn0002633	2.54298394431857	1.75207955868594	1.09827370056771	1.59530320882697	0.110644448401196	NA
FBgn0002638	1271.83081626933	-0.0219546599611937	0.277612106922348	-0.0790839427162834	0.936965855363616	0.958478054063935
FBgn0002641	420.004023206005	-0.166854119030721	0.252933134584889	-0.659676792858951	0.50946126240811	0.637928207486403
FBgn0002643	1493.58669472738	-0.955103985147891	0.39961733090914	-2.39004645512997	0.0168462418015034	0.0940391495845949
FBgn0002645	2786.56579885478	-0.703222467415615	0.40156771190639	-1.75119275421114	0.0799127131574237	0.196412328943265
FBgn0002673	1190.55455855953	-0.30206465985383	0.185855815923587	-1.6252634245141	0.104106441259895	0.226282504068281
FBgn0002707	105.776024922577	-0.106650093270246	0.352299227733608	-0.302725878669508	0.762098774302666	0.836448325640533
FBgn0002709	18.1526705620077	-0.0419307015166586	0.688921312998943	-0.0608642826480866	0.951467295003689	NA
FBgn0002715	957.112572889187	-0.0332873616705346	0.165228299072722	-0.201462835708813	0.840336686438114	0.893078049946411
FBgn0002716	38.3663291323131	-0.0995819170750003	0.314157496617172	-0.316980871528746	0.751258116708811	0.828276377062673
FBgn0002719	16110.220257325	-0.429180402948037	0.243160526070769	-1.76500853112618	0.0775623319393023	0.193048585106437
FBgn0002723	475.048252209469	-0.754990542166706	0.375537892976418	-2.01042439734335	0.044386290453659	0.145309998917851
FBgn0002732	21.1839505890875	-0.386865102292611	0.448729465010791	-0.86213438710406	0.388613570494122	0.529993344414426
FBgn0002733	116.806079985329	0.546463093630421	0.234910073590287	2.32626504806057	0.0200044154049748	0.101870184980726
FBgn0002734	0.939794133915609	1.30203911769273	2.50478268818015	0.519821190012587	0.603188208771112	NA
FBgn0002735	2.69674589653892	0.947492517329242	1.90364416204453	0.497725644435371	0.618677430448469	NA
FBgn0002736	498.934998634538	0.467505125850492	0.248880218216038	1.87843424922056	0.0603217838979869	0.169441189994047
FBgn0002772	11810.2678921752	-0.0350771808181635	0.207469135546832	-0.169071803021253	0.865740163543063	0.910228348702043
FBgn0002773	34631.1016418682	-0.151407968631889	0.241872029299763	-0.625983786013727	0.531325576322133	0.656076777811208
FBgn0002774	1076.14822706273	-0.35171888341726	0.194219265814909	-1.81093714849303	0.0701505813387739	0.183180218471793
FBgn0002775	361.391619156106	-0.059106725446681	0.157927273055667	-0.374265472347179	0.708206817546147	0.795253717554802
FBgn0002778	564.500622520923	-0.244694245419779	0.23667645733476	-1.03387657638325	0.301193866681597	0.444038495933679
FBgn0002780	2102.20817476032	0.0276992577924001	0.352703451403681	0.0785341274154343	0.937403184291794	0.95859086717901
FBgn0002783	905.065725577444	-0.232554162419121	0.355831358863272	-0.653551623898556	0.513400719777004	0.641154714412954
FBgn0002787	2148.35299610243	0.16520298387991	0.0968833752213617	1.70517370500821	0.0881620325809287	0.206810295089237
FBgn0002789	8106.79588643631	0.224182054047984	0.224114867280659	1.00029978719458	0.317165450160048	0.46052437346065
FBgn0002791	874.946354278063	-0.0411971233555445	0.18160747896755	-0.226847063731916	0.820542665949004	0.878490782707207
FBgn0002838	145.54597400586	0.569991861856493	0.280329204240785	2.03329461659266	0.0420227667433335	0.142105794536587
FBgn0002842	357.140834429005	0.974715395406634	0.39216983119243	2.48544206585937	0.012939064597198	0.0854432265681634
FBgn0002855	12119.4610344174	0.380071743955718	0.315270129562916	1.20554314638891	0.227993692087937	0.368177114435704
FBgn0002856	4695.1113583804	0.752910280219592	0.405999453730979	1.85446131343438	0.0636731899525095	0.174161301475613
FBgn0002862	21071.5750411674	1.54421482979529	0.455903946142017	3.38714951441604	0.000706228887382277	0.0313261257992395
FBgn0002863	38000.0738603183	1.47748440361876	0.5349466516067	2.76192850105926	0.00574610602600631	0.0619979372100988
FBgn0002865	17326.0206142795	0.795448952378077	0.375003789155525	2.1211757731018	0.0339070132461994	0.129551242541106
FBgn0002868	30183.5783568961	0.843267758761714	0.401300077137265	2.10133963785228	0.035611162587314	0.132115307216355
FBgn0002869	237.251944908659	1.18867522433761	0.450388726137465	2.63922064508962	0.00830968774734573	0.0722137605999719
FBgn0002872	316.129190387817	-0.26616949169215	0.492528556733996	-0.540414333449304	0.58891132513901	0.702716966159524
FBgn0002873	2864.45712300286	-0.724075462643117	0.355317650169959	-2.03782576603433	0.0415673606123133	0.141830719685733
FBgn0002878	243.196592226275	-0.297015175147402	0.330535835316946	-0.898586910743274	0.368872733254016	0.510695340527652
FBgn0002887	372.412287395886	-0.446933928850198	0.291778571700401	-1.53175720288709	0.125582360655145	0.252316031834648
FBgn0002891	292.484496189479	-0.384350547189253	0.289460235676453	-1.32781812427896	0.184238197970783	0.319726890452774
FBgn0002899	143.655537446635	0.0481130158509661	0.481591572142544	0.0999041898447621	0.920420389980604	0.94613125917638
FBgn0002901	253.434715493997	-0.175199161439671	0.200771255208419	-0.872630702327376	0.382864400270058	0.524363822555125
FBgn0002905	248.479176898559	-0.275138476800538	0.234117080132771	-1.17521744523938	0.239907732559542	0.380023422510305
FBgn0002906	357.807712451083	-0.127066010852055	0.479027320716091	-0.265258379547342	0.790810424659311	0.856121007022908
FBgn0002909	0	NA	NA	NA	NA	NA
FBgn0002914	1696.7528171122	-0.318597186553788	0.217702468251239	-1.4634523398518	0.143343645823964	0.273220480893438
FBgn0002917	773.402788226938	-0.862663985252537	0.329993123571432	-2.6141877622059	0.0089439869329821	0.0734076276808633
FBgn0002921	31100.7494458215	-0.686016701690811	0.271179320096322	-2.52975301157603	0.0114142844972302	0.080888533602211
FBgn0002922	100.287496196369	-0.314129783330541	0.232180268297581	-1.35295641457321	0.176069554971136	0.311153360695422
FBgn0002924	407.537870102833	0.383967013526239	0.171675102982864	2.23659113555076	0.0253130748143572	0.11342668285862
FBgn0002926	13.9994427379528	0.191612180244812	0.765006196389321	0.250471409446334	0.802222812123107	NA
FBgn0002930	2416.19985633627	0.0663003911657508	0.133457345679582	0.496790872230677	0.619336532644866	0.728039571791154
FBgn0002931	324.301609783237	-0.533692868620986	0.177801503339613	-3.00162180069758	0.00268545583364232	0.0475094643456872
FBgn0002932	469.639721637885	-0.496131168826878	0.434500863167449	-1.14184161847264	0.253519859443391	0.394914498113727
FBgn0002933	1.54490656469167	0.222309973012493	1.32807492303341	0.167392644162516	0.86706111262721	NA
FBgn0002936	885.884441563557	0.914235174114821	0.451201822740549	2.02622225362889	0.0427420141696608	0.142906865177002
FBgn0002937	599.862875142046	-0.196844334500337	0.312792895346477	-0.629312038185184	0.529144791745464	0.654181070425558
FBgn0002938	9074.51754926518	-0.286751872995879	0.171431674627409	-1.67268898013806	0.0943885397443941	0.215010997225859
FBgn0002939	770.192849933482	0.205429036813739	0.252589659644699	0.81329155398801	0.416050918328297	0.553921657206365
FBgn0002940	88664.2538161559	0.114010552150278	0.2209572947739	0.515984558314504	0.605865194208751	0.717002162100798
FBgn0002941	62.775122429357	0.0786242126164737	0.29229678564404	0.268987606015698	0.787939220258439	0.853843418785745
FBgn0002945	835.97785098905	-0.807522214871819	0.389445120088177	-2.07351992159764	0.0381239190698145	0.136405353021656
FBgn0002948	131.053036943003	0.130209016773762	0.575099948631591	0.226411108336185	0.820881689034297	0.878616289195041
FBgn0002962	134.277848826154	0.891975522779959	1.12257880317311	0.794577200512494	0.42685948510217	0.564546416698724
FBgn0002973	2213.94839956869	-0.663333170478894	0.220527037654973	-3.00794486486829	0.00263020851595988	0.0472075844540266
FBgn0002985	251.896910039245	-0.620429042295239	0.249299423256494	-2.48869024320568	0.012821461990628	0.0849289808598723
FBgn0002989	132.191037500868	-0.256551074558335	0.298537952318115	-0.859358324682821	0.390142854946752	0.53091023355733
FBgn0003002	38.2507947646762	-0.411838231327043	0.36693013998683	-1.1223886687036	0.261697220235644	0.403889313423661
FBgn0003008	350.037171638879	0.284598562881923	0.16740465581567	1.70006360632703	0.0891189619311763	0.208120967583992
FBgn0003009	576.88925743369	0.0246332975798318	0.183685481796894	0.134105849514386	0.893318874185173	0.927975307405415
FBgn0003011	69.4457882487676	-0.164809534824299	0.225433789688718	-0.731077337837732	0.464731915666921	0.598521664562002
FBgn0003015	448.542664846134	0.865391444759316	1.99242886762077	0.434339944990213	0.664041600974013	0.761431286555109
FBgn0003016	1210.81608780667	-0.850319860172795	0.442877582337439	-1.9199884891101	0.0548593534001907	0.160997353908245
FBgn0003023	171.515582239703	0.586300600623617	1.38348468438647	0.423785392957654	0.67172233187815	0.767852407690841
FBgn0003028	403.482091425396	-0.315140528696946	0.632432271420651	-0.498299253434738	0.618273133990449	0.727160006471781
FBgn0003034	14429.5050628025	1.99044535646802	0.545690370970637	3.64757280383664	0.000264729312751421	0.0238550427979237
FBgn0003041	649.989489376299	-0.37027544506578	0.429942460837726	-0.861220927898846	0.389116375867129	0.530270354530584
FBgn0003042	213.20592814532	-0.39793279795592	0.290753269920459	-1.36862707705672	0.171115875602306	0.305759774445851
FBgn0003044	660.478867505	-0.178806238355026	0.33228229681077	-0.538115452045443	0.590497345303835	0.704024512365303
FBgn0003046	12.1523521593624	1.09654189781843	0.558184921370216	1.96447782058797	0.0494747059149279	NA
FBgn0003048	1330.20568430751	-0.977118068289847	0.525435189908944	-1.85963575918693	0.062937076497686	0.173241338441395
FBgn0003053	1617.04738893744	-0.859931119705985	0.418510943196343	-2.05473986686783	0.0399041370903241	0.13929440965234
FBgn0003057	0.60591955215111	0.528416945648034	3.26882439525274	0.161653512625348	0.871578714478539	NA
FBgn0003060	17.896999288351	0.964970827364801	0.7947647952929	1.21415899783177	0.224687014382165	NA
FBgn0003062	842.449416228819	0.801829800787728	0.230067933028058	3.48518713683553	0.000491792964520133	0.028155209636907
FBgn0003065	5.34165093264227	-0.52847166283306	0.942527910728436	-0.560696035435841	0.575004770342016	NA
FBgn0003067	0	NA	NA	NA	NA	NA
FBgn0003068	442.081160971291	-0.0293801231433232	0.157745625585649	-0.186250002396239	0.8522487136496	0.901447174116405
FBgn0003071	8589.70714669403	-0.150653746492153	0.163391824814831	-0.922039683826818	0.35650787652534	0.498475351872727
FBgn0003074	13645.4057795722	-0.0196198148443666	0.167170134895843	-0.117364353726166	0.906571330415302	0.937197066277506
FBgn0003076	8012.06774874634	0.0754570677271633	0.156969397218664	0.48071196719988	0.630721224572646	0.736143097540735
FBgn0003079	435.535679285617	-0.28806403268226	0.259743508532403	-1.1090326542129	0.267416095385229	0.409501294967454
FBgn0003082	183.365374940119	0.712500553591139	0.330002316320954	2.15907743174194	0.0308441601991446	0.123949613173146
FBgn0003086	0.344280794617471	-1.30339694022855	3.7719031795846	-0.345554187945006	0.729677779958535	NA
FBgn0003087	447.85029300722	-0.0782485284434476	0.244944177962724	-0.319454534883273	0.749381862482945	0.82689979532208
FBgn0003089	160.602328733739	0.299821390708492	0.23923658631194	1.25324222072603	0.210117568870905	0.348845476030914
FBgn0003090	242.724761368625	-0.504521331788786	0.280200953325528	-1.80056964760805	0.0717707367918523	0.185396183086772
FBgn0003091	1238.23765167582	-0.45324999693543	0.201409584270153	-2.25038941705714	0.0244242362135815	0.111676153650655
FBgn0003093	1846.72853515537	-0.643163697773948	0.309124715337101	-2.08059616673671	0.0374708850661224	0.135170164255503
FBgn0003114	23.5087855107272	1.79161366086198	1.10804603929308	1.61691265283978	0.105897136798811	0.228403549474057
FBgn0003116	529.32059779396	-0.129320788664862	0.229340205144137	-0.563881891461574	0.572834514761284	0.690062353462431
FBgn0003117	29.8169060707093	-0.841662149077115	0.389137064310727	-2.16289381369503	0.0305493476983467	0.123498376385288
FBgn0003118	402.839760551457	-0.622696688334269	0.394372984582186	-1.5789537130541	0.114346674349869	0.239020175393457
FBgn0003124	2088.95636285466	-0.274831079894436	0.258018518256197	-1.06516029063288	0.286803399815652	0.42950414791081
FBgn0003129	184.635385081017	-0.576572822980777	0.18485899395814	-3.11898712978682	0.0018147388797841	0.0415780347865664
FBgn0003130	8.49975078019522	-0.383353473534581	0.703964140461513	-0.544563922365787	0.586053473443501	NA
FBgn0003132	2023.02665987648	-0.198598151534415	0.153629339091125	-1.29270979559846	0.196111448564117	0.332463289587398
FBgn0003134	3797.28707591472	-0.389514827010192	0.226579535039219	-1.71910859885368	0.0855945993549425	0.203431941530221
FBgn0003137	2366.01235745952	-0.333174775658869	0.471380503931978	-0.70680643955302	0.479686772228167	0.612463029398515
FBgn0003139	477.817864327434	-0.238731572207248	0.258387702673952	-0.923927763344422	0.355523926988982	0.497522011276062
FBgn0003140	709.737337347074	0.0554050220623997	0.164397029230441	0.337019606265126	0.736102120175616	0.817052447181368
FBgn0003141	875.214345908873	0.329221230211409	0.190771581554351	1.72573518303413	0.0843950653820422	0.202364086593915
FBgn0003145	879.943200544301	0.348689920818187	0.329636244980707	1.0578021262152	0.290145663266023	0.432787473716778
FBgn0003149	11628.9718402736	-0.444609731137522	0.27173606644981	-1.63618225930139	0.101801448221313	0.2237457922702
FBgn0003159	3226.97835965537	-0.464832856051291	0.20013785046411	-2.32256344801029	0.020202616235842	0.102286420557641
FBgn0003162	1379.95447530522	-0.493443579063085	0.266457867003749	-1.85186342820999	0.0640454367108969	0.174598817612747
FBgn0003165	2562.07877276956	-0.806071573772481	0.339655703154817	-2.37320194033388	0.0176346195281244	0.0960390564958708
FBgn0003169	938.595865046011	-0.523083084625832	0.347436721032076	-1.50554922079621	0.132182932352222	0.260646303069626
FBgn0003174	55.7807131805154	-0.851678301964487	0.415548861667776	-2.04952625437677	0.0404106832762451	0.140197907698494
FBgn0003175	1864.85969385182	-0.630740223525964	0.342703902985396	-1.84048158784128	0.0656975649810152	0.176947379897788
FBgn0003187	2980.51618062347	-0.44527984206829	0.242199691476514	-1.8384822844065	0.0659913699757242	0.177288143678339
FBgn0003189	959.126788127033	-0.354527048498357	0.297253147175495	-1.19267719069446	0.232995821972087	0.372963178452038
FBgn0003204	1322.82482214813	-0.172268693099307	0.216420303513565	-0.795991366348442	0.426037053605861	0.563968262078338
FBgn0003205	1120.91276597692	-0.167664854200792	0.33464302826019	-0.501025989014271	0.616352832533248	0.725503235864279
FBgn0003206	1007.02154395079	-0.411346418628818	0.216595933770671	-1.89914192509424	0.0575458180298583	0.165345388598768
FBgn0003209	1466.16360869726	-0.80500813688179	0.363313393894927	-2.2157403233931	0.0267092915902802	0.116071250572901
FBgn0003210	920.333893458457	-0.406951626938818	0.315733145828984	-1.28891005684669	0.197429357353847	0.33370982214262
FBgn0003218	4056.73078179858	-0.345405927349089	0.17897488721319	-1.92991280915099	0.0536176420321365	0.159170381480963
FBgn0003227	23.2375156062624	-0.656802181476798	0.375401029393645	-1.74960143965955	0.080187111150587	0.196719739720267
FBgn0003231	9357.78141803077	-0.577225926296229	0.305329276839042	-1.89050304075662	0.0586907142875277	0.167291967856374
FBgn0003248	549.054104804787	-0.481692277339611	0.234177429036953	-2.05695433296264	0.0396906188486299	0.138917165970205
FBgn0003249	3992.74294463578	0.332237296679367	0.344974294095514	0.963078415887358	0.335508172600743	0.478146329061249
FBgn0003250	3290.13033109138	0.388861059708383	0.272374671444486	1.42766967885132	0.153386957463498	0.285493045722538
FBgn0003254	505.045062198341	-0.521851708482334	0.282795193714991	-1.84533443311725	0.0649889045309452	0.176092930541068
FBgn0003255	57.201877597376	-0.655550773681886	0.324094687511017	-2.02271372825141	0.0431026706838762	0.143316685112894
FBgn0003256	1323.62521170666	-0.563786511581539	0.626771383946163	-0.89950901719847	0.368381594983648	0.510257505237575
FBgn0003257	292.109033155032	-0.203544186269798	0.304904186204823	-0.667567699884137	0.504409581506851	0.633353106823283
FBgn0003261	12066.1486816989	-0.224497380930293	0.199889959242783	-1.12310484118726	0.261392970290377	0.403561583335923
FBgn0003267	20.5803501973002	1.03585749106507	0.839219881896089	1.23430999838172	0.21708741164455	0.356756099927692
FBgn0003268	229.216785840827	-0.347525320375768	0.367751341099311	-0.945000824026688	0.344658455334711	0.486815748963169
FBgn0003270	0.187506579248633	-1.30326197429175	3.81151627214869	-0.341927432873598	0.732405504118416	NA
FBgn0003274	22384.1104421683	1.01927072583838	0.228176917608149	4.46701943615867	7.93169261353394e-06	0.00485111524111638
FBgn0003275	1494.73605504264	1.28328495569383	0.327507589661174	3.91833653999123	8.91621622011839e-05	0.015833499859486
FBgn0003277	1232.68350974517	-0.524254074290945	0.424690579977359	-1.23443772715395	0.217039838030542	0.356756099927692
FBgn0003278	189.875018979903	-0.128116479547279	0.26411389749649	-0.485080417053713	0.627619302654127	0.73423822868
FBgn0003279	22633.3120976416	0.574908452166145	0.242140034633764	2.37428087030586	0.0175831695619525	0.0958380950803319
FBgn0003285	152.333339380168	-0.648546343115342	0.283994600932129	-2.28365729836652	0.0223916794924674	0.10738139708294
FBgn0003292	81.8918952755395	0.158080110478521	0.392495985215451	0.402755993521173	0.687127737572821	0.779221900213854
FBgn0003295	65.7591007756304	-0.109538181823948	0.300236021260876	-0.36484023923555	0.715230665863231	0.800615922515269
FBgn0003300	21.897107181865	0.134231261281619	0.403236279092388	0.332884882242613	0.739221181491908	0.819463130677752
FBgn0003301	2113.01046146955	-0.93352212654531	0.386438777740749	-2.41570510082605	0.0157047749230038	0.091499309365547
FBgn0003302	1112.07966967978	0.165976419444836	0.151263736041947	1.09726510654747	0.272525519589851	0.414281968375053
FBgn0003308	983.578678555564	-0.380079399249905	0.341277654908951	-1.11369553143263	0.265409826996264	0.407376099364882
FBgn0003310	867.60020561842	-0.204246054198191	0.202013408979877	-1.01105196545907	0.311991558825306	0.455269915370468
FBgn0003312	22.1517653132788	-0.0432656037804108	0.443600791920938	-0.0975327469391035	0.922303329892179	0.947302198401638
FBgn0003313	0	NA	NA	NA	NA	NA
FBgn0003317	738.590754493881	-0.473779803117801	0.250777466225612	-1.88924391911498	0.0588591522621995	0.167547638699701
FBgn0003319	7.09047405015384	-1.31751655537073	0.809099531890249	-1.62837389399139	0.103445629652859	NA
FBgn0003321	2055.72564461233	-0.143190959421496	0.102831622228759	-1.39247982593286	0.163777146550411	0.297798124341797
FBgn0003326	119.776379934279	-0.456876132755083	0.251866756469207	-1.81395964739372	0.0696839385128623	0.182762533539408
FBgn0003328	1108.88708896407	-0.683162980067629	0.379456726543523	-1.80037124731078	0.0718020377412136	0.185401812074235
FBgn0003330	274.430788833797	0.0583970154211639	0.197165184503474	0.296183200742193	0.767090177457956	0.839506899713127
FBgn0003334	1057.20553068643	-0.618211287322195	0.362221240243458	-1.70672290478239	0.0878735678493909	0.206390868755193
FBgn0003339	221.252735515421	-0.782508141742948	0.306940132705362	-2.54938360404663	0.010791352713093	0.0792761803692058
FBgn0003345	1095.73684790919	-0.692584312762584	0.302211295879952	-2.29172212357575	0.0219216829533421	0.106134799480255
FBgn0003346	772.879317217598	0.440836317709323	0.310403996044891	1.42020181223945	0.155548936225111	0.288214020510495
FBgn0003353	343.756174095559	-0.20255194007104	0.192538514199006	-1.05200739142343	0.292796158467054	0.435213425662301
FBgn0003356	26527.3912289836	0.901211111772891	0.50664326834289	1.77878828770496	0.0752744781019367	0.190010725141773
FBgn0003357	18721.5832376889	0.767559994050534	0.433383437382834	1.77108751244802	0.0765461502579855	0.191689584036685
FBgn0003358	5416.91369260758	0.35971506230287	0.160187784606907	2.24558360168094	0.0247306918110302	0.111997983471472
FBgn0003360	37752.9892817629	0.0933993289363296	0.214128653961551	0.436183234744008	0.66270379078264	0.760426769425181
FBgn0003366	2096.25811967903	-0.642705020884271	0.408158914294387	-1.57464408683897	0.115338620544394	0.240004894495633
FBgn0003371	4147.42075795004	-0.732068379639185	0.360780344666331	-2.02912489680179	0.0424455706483622	0.1423569113344
FBgn0003372	7.20249429738739	0.991111575012709	0.62803274293562	1.57812086417652	0.114537845846046	NA
FBgn0003373	0.659931444074088	-1.38134513914654	2.6594798050022	-0.519404259640693	0.603478861500329	NA
FBgn0003374	2.03027802671386	0.429180907715059	1.28595917423897	0.333743804867716	0.738572891420925	NA
FBgn0003375	2.4950396033047	-0.666902921324638	1.18385446437771	-0.563331846431981	0.573208936360912	NA
FBgn0003377	1.63981908398829	1.51255662377042	1.51836416475242	0.99617513300378	0.319165059467541	NA
FBgn0003378	0.255377253318887	2.10673771703253	3.76044922712376	0.560235649995439	0.575318713427613	NA
FBgn0003380	2381.77987427899	-0.817704590729422	0.35328900692855	-2.31454864061139	0.0206376463812299	0.103224790461935
FBgn0003382	19.3981540296682	-0.463501055263782	0.427051501236622	-1.08535165880839	0.277765934139415	NA
FBgn0003386	815.59498631459	-0.712334863263807	0.271837887778769	-2.62043995811037	0.00878163924126864	0.0732674574822502
FBgn0003388	162.771301110524	-0.727385275902984	0.30700080938734	-2.36932689967358	0.017820494731635	0.0962572632562826
FBgn0003390	484.792328826771	-0.0288841451982433	0.278361442045945	-0.103764892816857	0.917355927502346	0.94357018964053
FBgn0003391	1030.14866374703	-0.738388089576894	0.485780475520204	-1.52000363700534	0.128510061554488	0.256087059585362
FBgn0003392	4867.50002995185	-0.624240879844392	0.254421399587183	-2.45357065426598	0.0141445749470109	0.0881292197034055
FBgn0003396	1812.30117742118	-0.757967049619711	0.470265889702619	-1.61178402732766	0.107008945131117	0.230102693251591
FBgn0003401	53.4502464240616	0.88169207473617	0.611848771150238	1.44102941169375	0.149576373789638	0.281300348706935
FBgn0003410	2088.06521564783	0.425895767279505	0.184572274055205	2.30747423717671	0.0210283968474903	0.104106764400164
FBgn0003411	31.5937023001274	-2.08187509585862	1.1569789327651	-1.79940622676947	0.0719544453226307	0.185504474105741
FBgn0003415	2271.77996046537	-0.733415683860053	0.418156898929383	-1.75392462909935	0.079443422773491	0.195624252965624
FBgn0003416	406.256742709152	-0.547541840523676	0.505498963380742	-1.08317104522184	0.278732509163667	0.420794230855187
FBgn0003423	4671.5261078364	-0.476546617884406	0.19269043424629	-2.47312026540612	0.0133939061052464	0.0864272075320988
FBgn0003429	3068.37894262834	-0.694888053937033	0.321628782783143	-2.16052819627638	0.0307318032518802	0.123772783870459
FBgn0003430	64.7243353719916	0.217346552337169	0.382968737136868	0.56753079627879	0.570353609523354	0.688113260780019
FBgn0003435	15697.6122128926	-0.558507335031916	0.201640627655259	-2.76981549564894	0.00560880547100445	0.0614111407822203
FBgn0003444	265.736863487369	-0.362772021855258	0.439467830365704	-0.82548026678853	0.409098981359137	0.548269449882244
FBgn0003447	472.073962384072	-0.391226489360376	0.414948115538814	-0.94283230772687	0.345766683602784	0.487962537737877
FBgn0003448	2.01675087982522	0.253201072076837	1.53826218159014	0.164602026304187	0.869257236213727	NA
FBgn0003449	613.952486586649	0.70778623143459	0.210859361379844	3.35667445259676	0.000788859369605037	0.0323792499264536
FBgn0003450	14.1499218185422	0.711232936862311	0.543384587911988	1.30889420253029	0.190570190713601	NA
FBgn0003459	382.996696922174	-0.483909348039956	0.273983999664525	-1.76619564876953	0.0773630308084784	0.192771055016246
FBgn0003460	388.869532298233	-0.069462490642685	0.181314963816294	-0.383104015138339	0.701642642686925	0.790816506625668
FBgn0003462	11116.2805151924	0.272658029362774	0.127800345815384	2.13346863518388	0.0328863019429061	0.127876074910226
FBgn0003463	1128.33131489075	-0.932962728616051	0.381044287830092	-2.44843646372166	0.0143477732570603	0.0885903359857383
FBgn0003464	1184.11325111191	-0.254916128682688	0.231621643015273	-1.10057128239039	0.27108328987394	0.412968715501211
FBgn0003475	4507.02858566991	0.0145117521943871	0.12793494433246	0.113430714884871	0.909689089890888	0.939056893137639
FBgn0003479	200.021823037711	0.236673844455857	0.171150181819916	1.38284307933068	0.166712986621623	0.30118991850703
FBgn0003480	51.8357419020471	0.254317288685159	0.330787705706939	0.768823279395006	0.441998227167129	0.578392233239245
FBgn0003482	14.9487504941191	0.617939801376639	0.800790074259402	0.771662663211867	0.440314249833238	NA
FBgn0003483	248.028652222006	-0.0183912546975394	0.544839180461308	-0.0337553820596525	0.97307221560981	0.982134445754983
FBgn0003486	2.20873507350387	-0.999918057725501	1.58240446087844	-0.631897901229636	0.527453594877465	NA
FBgn0003495	480.587337991024	-0.425091605314998	0.346518630298527	-1.22674964098981	0.21991670368099	0.359898466371846
FBgn0003499	287.85702621655	-0.628000257191897	0.302592830107199	-2.07539701773309	0.0379497543679349	0.136151978225265
FBgn0003502	829.870263402306	-0.50058250101602	0.424059222152487	-1.18045422635807	0.237819605582124	0.377565134241853
FBgn0003507	1113.13717708764	-0.647313183166777	0.330779105498051	-1.95693492245263	0.0503551200526942	0.154395859543067
FBgn0003510	0	NA	NA	NA	NA	NA
FBgn0003511	0	NA	NA	NA	NA	NA
FBgn0003512	364.757863236439	0.160765019281658	0.14992867638459	1.07227665286173	0.283595790066491	0.425728815030982
FBgn0003513	130.18810822486	-0.501423036336475	0.29230724754043	-1.71539720809393	0.086272426937032	0.204541448874506
FBgn0003514	2049.13477101495	-0.101470193243298	0.127106129672922	-0.798310777807547	0.42469016509994	0.562784659169979
FBgn0003515	620.928202529785	-0.30205309399199	0.309714963693283	-0.975261544970489	0.32943054040244	0.472513347605565
FBgn0003517	24884.7898490148	1.10193457691496	0.365535670155713	3.0145746828088	0.00257339846106747	0.0470715371246597
FBgn0003520	2020.49347398399	-0.520403908456036	0.38103790653544	-1.36575364164624	0.172016301442401	0.30652027792056
FBgn0003525	181.286563171794	0.616463069019852	1.39710592502645	0.441242899322886	0.65903715925493	0.757671309540488
FBgn0003527	407.004736323279	0.045107477598713	0.181826881939921	0.248079256034415	0.804073085311206	0.866066456208799
FBgn0003545	851.872279631702	-0.129477517802492	0.15400541723894	-0.840733528234313	0.400497233038581	0.54089356341026
FBgn0003557	1991.05389536641	-0.582108443797196	0.297976858366085	-1.95353574431621	0.0507561460910515	0.154926197544836
FBgn0003559	581.296972597783	0.0354104148447889	0.123193402511883	0.287437590997401	0.773777281549888	0.844326469628887
FBgn0003567	558.538449277796	-0.362862283614037	0.411896901688203	-0.880954146843075	0.378342638566199	0.520606425785576
FBgn0003575	1080.15798494325	-0.60095356828398	0.271279784147322	-2.21525378373799	0.0267426501198227	0.116071250572901
FBgn0003598	607.016764664589	-0.179558249074071	0.372252896402884	-0.482355545945134	0.629553394710695	0.735586378884141
FBgn0003607	1367.40475925864	0.229930550356111	0.147717898133178	1.55655173314755	0.119576951000408	0.245105435487305
FBgn0003612	1721.30514830137	-0.143011935859885	0.242854580647612	-0.588878889904073	0.555942519790669	0.676720577554015
FBgn0003638	5445.26435853718	0.616283602536208	0.299102457973889	2.06044312277102	0.0393561979888933	0.138529741235275
FBgn0003651	1132.08188954669	-0.824113053395992	0.290453676535359	-2.83733042468707	0.00454925051102251	0.0568233631379801
FBgn0003654	653.937657179575	-0.297233396516055	0.204914870191792	-1.45052136156765	0.146913186689231	0.27764084370161
FBgn0003655	164.078672277327	0.736993532589003	1.27306901735568	0.57891090156277	0.562649293966303	0.682096420236687
FBgn0003656	4852.57958534171	-0.574372935529924	0.278664060194147	-2.06116617668512	0.03928718914938	0.138400124150408
FBgn0003660	2959.96999723296	0.286870333067548	0.151427283958399	1.89444283466353	0.058166255368892	0.166583097441257
FBgn0003676	1381.52031200754	0.331626831382731	0.148968133306726	2.22615954178543	0.0260034968660228	0.114513783098851
FBgn0003683	1.47760956886223	1.48377008121871	1.52867226315222	0.970626678447795	0.331734215873254	NA
FBgn0003687	179.431941504264	0.176593340954063	0.192781985409674	0.916026155549704	0.359653176614725	0.501754839428401
FBgn0003701	275.706007148497	-0.181864971444375	0.450603540684485	-0.403603067938868	0.686504629293708	0.778906635933599
FBgn0003710	378.363819769436	-0.593614417654784	0.207675628858913	-2.85837303547092	0.00425819476085705	0.0556489804704018
FBgn0003714	289.950274414748	0.325985431246697	0.267848907613745	1.21704969473607	0.223585308845704	0.363913128086645
FBgn0003716	1481.06230592312	-0.744173785786706	0.365662447092452	-2.03513866874755	0.0418369220942764	0.141868090909525
FBgn0003719	50.412679664908	0.344157006151505	0.330598408801408	1.04101228859284	0.297869845002205	0.440716232935652
FBgn0003720	0.241053378169029	0	3.81693625647235	0	1	NA
FBgn0003721	13248.4944126987	-0.115797558879738	0.194539240752654	-0.595240109048068	0.551682983190096	0.673225411320157
FBgn0003731	2091.38809733493	-0.766969704648802	0.386352830531104	-1.98515357994007	0.0471273871125383	0.149316064891914
FBgn0003732	1432.8044586379	-0.324256822527713	0.445505283509674	-0.727840576823759	0.466711182323495	0.600634771013006
FBgn0003733	160.501545060567	-0.183178041742229	0.574119937408285	-0.319058840856736	0.74968189398544	0.826953803178782
FBgn0003741	257.159468418226	0.358800855575252	0.163528986935718	2.19411165138749	0.0282273838469687	0.11889216495891
FBgn0003742	834.220320853566	-0.475113226483572	0.177166848305898	-2.68172759761034	0.00732430730001899	0.06916876298957
FBgn0003744	992.105620327876	-0.546994634356569	0.275809265118538	-1.9832351684106	0.0473411672805336	0.149705361918807
FBgn0003747	10.0231162002437	-0.329048569998146	0.616580952406038	-0.53366645322747	0.593572322818875	NA
FBgn0003748	7176.17573578731	-0.433569332890429	0.202614281704687	-2.13987547789134	0.0323648313528817	0.126931439109859
FBgn0003751	9.35047515690202	1.11763182713003	0.781545326567353	1.43002816233169	0.152708936390732	NA
FBgn0003861	10208.0819830412	0.188598320789103	0.235884705051122	0.799536030741072	0.423979663002359	0.562259327472731
FBgn0003862	2074.18988258278	-0.663881325944879	0.420369199476172	-1.57928156195114	0.114271489088449	0.238954380516068
FBgn0003863	34421.8993873262	0.157362279253933	0.220999730053091	0.712047382212322	0.476435435584057	0.6094339672186
FBgn0003865	0	NA	NA	NA	NA	NA
FBgn0003866	421.018794035802	0.142501169470515	0.165061849331416	0.86331984070042	0.387961638431597	0.529417427690296
FBgn0003867	455.017428966976	-0.34998118312545	0.255675932196241	-1.36884680587309	0.171047166452534	0.305749711105248
FBgn0003870	1743.26288663712	-0.507748384815239	0.31005949147838	-1.63758375011927	0.101508555144112	0.223325602115653
FBgn0003882	502.531113684769	-0.343152874894893	0.292243922119233	-1.17420021058604	0.240314841716703	0.380472025570947
FBgn0003884	38084.7395697835	0.483268984338492	0.260539540484013	1.85487770278825	0.0636136927114841	0.174121501720568
FBgn0003885	6811.36535808381	0.631856960811491	0.324675535019959	1.9461181784844	0.0516405454358758	0.156454260266164
FBgn0003886	376.044624758262	0.891453837319155	0.443451350855622	2.01026298735844	0.0444033620387075	0.145309998917851
FBgn0003887	9377.39225800697	0.536889455865402	0.188660119014508	2.8458025928846	0.00442996481369405	0.0563868178315028
FBgn0003888	1801.32896260428	-0.566586176194218	0.260702511487489	-2.17330540070922	0.0297573392890568	0.122499771837174
FBgn0003889	26015.3524316587	0.113788446667412	0.204091167575246	0.557537339902082	0.577160354511129	0.69349785756381
FBgn0003890	1988.70781747382	0.257057223948479	0.151916005142327	1.69210099823022	0.0906267181737583	0.210432941641344
FBgn0003891	5613.24669362861	-0.728486790771463	0.410346090062513	-1.77529848197282	0.0758486159357392	0.190874816874389
FBgn0003892	343.786561787645	-0.906523200031327	0.401826367903428	-2.25600725199098	0.0240701769654612	0.110835550976227
FBgn0003896	165.517585900264	-0.641321620396411	0.285183790217057	-2.24880109738457	0.0245251535358516	0.111676153650655
FBgn0003900	301.069583648467	0.304227255785159	0.321486189865379	0.946315161819401	0.343987862359873	0.486308076557577
FBgn0003916	0.171188473919673	-0.6283873424534	3.81693625648277	-0.164631343105647	0.869234159591016	NA
FBgn0003920	2.80666722251143	2.54280249691695	1.66401686471077	1.52811101308094	0.126484977559078	NA
FBgn0003922	2.8973540408864	1.17203487672916	1.49441347543417	0.784277508196755	0.432877294047184	NA
FBgn0003923	0.325611606667221	2.43090643366047	3.73486339840024	0.650868900506964	0.515131118454573	NA
FBgn0003926	0.0935074254611484	1.05472934698451	3.81693625648277	0.276328782067852	0.782295551301721	NA
FBgn0003930	74.5775912897106	2.41358118133237	0.860485119907012	2.80490751727722	0.00503310187619183	0.058780054451745
FBgn0003931	7.69309960303861	2.90890088315055	1.11903505280381	2.59947253293106	0.00933671501479699	NA
FBgn0003933	1.86983302890729	-1.732611606974	2.16015497662798	-0.802077455423416	0.422508155108341	NA
FBgn0003934	22.9753053613582	-0.59086001623763	0.368416943830066	-1.60378078731951	0.108762380976616	0.232150940859679
FBgn0003935	2.62266973992022	1.17591111363612	1.6432186880887	0.715614496207968	0.474229420084893	NA
FBgn0003936	1.06099006397931	0.205443346254809	2.20368566249546	0.0932271556471282	0.92572310124489	NA
FBgn0003938	66.1810133760798	1.50929422558235	0.749538948493207	2.01363015039642	0.0440483784961075	0.144788475270522
FBgn0003941	14378.7211262287	0.793944420336488	0.292135669444134	2.71772502771462	0.00657324404230084	0.0652939472399558
FBgn0003942	21842.9458679755	0.722735690888103	0.238983368073488	3.02420916030382	0.00249284028552024	0.0464747601300967
FBgn0003943	11883.1871753132	0.161235397064287	0.251809528638058	0.640306973037707	0.521973048290378	0.647929231902142
FBgn0003944	454.237540662643	-0.835287275029219	0.334327628033136	-2.49840935953529	0.0124752040956724	0.0840510514506865
FBgn0003950	152.302492964114	-0.592562547210501	0.302161851670703	-1.96107663470463	0.0498700839027736	0.15377715135175
FBgn0003961	1902.90068863851	0.234417681082497	0.415173241600235	0.564626179131782	0.572328054969018	0.68951529914603
FBgn0003963	275.406599607133	-0.473620545680573	0.282123406097226	-1.67877083377248	0.0931967149216939	0.213538553784904
FBgn0003964	807.341318659517	-0.605933661774289	0.287696861745019	-2.10615318533199	0.0351910481745398	0.131301728315251
FBgn0003965	650.653177443489	-0.200775924061748	0.189844358854353	-1.05758172259299	0.290246178877748	0.432888391320667
FBgn0003969	614.734285228916	-0.361470284515025	0.210324032183227	-1.7186351971425	0.0856808185364751	0.203600126875816
FBgn0003975	112.761358227158	-0.462586420612773	0.284562521540685	-1.62560557204873	0.104033589110754	0.226265907575194
FBgn0003977	482.944081848769	-0.539510515503932	0.343267695781222	-1.5716903225516	0.116022387616701	0.240857064995653
FBgn0003978	165.451279534061	0.144497513137026	0.189410636863662	0.76287961188281	0.445535196322017	0.581424534556339
FBgn0003979	8.30893043568809	0.283722231309279	1.32881810632538	0.213514724068492	0.830925505753127	NA
FBgn0003980	10.1240872474654	1.78136555272328	0.687800804194427	2.58994398066992	0.00959915513326148	NA
FBgn0003983	4.91006226200532	0.510387577114631	1.56615578746027	0.325885573581599	0.744510931010897	NA
FBgn0003984	279.029065172165	-0.217580373152835	0.18838151114452	-1.15499855495859	0.248091018220446	0.388950502681919
FBgn0003996	247.461225653257	0.469042823705717	0.575236717235229	0.815390968017631	0.414848552651962	0.553093756940616
FBgn0003997	304.515202379583	-0.707862255690357	0.404033817465096	-1.75198764334005	0.079775932687126	0.196185950573119
FBgn0004003	923.057747507034	0.701334365730911	0.319440454384419	2.19550891599633	0.0281271120347571	0.118796800001886
FBgn0004009	50.2186423477422	-0.700167990655088	0.329362084797726	-2.12583057665878	0.0335173690765873	0.128891333827041
FBgn0004028	13283.8192715211	-0.185095806596988	0.181332563773952	-1.02075326540757	0.307371351392886	0.450670168821337
FBgn0004034	104.127724591763	-0.883323900221182	2.07105835538972	-0.42650845540997	0.669737388102337	0.766361534861478
FBgn0004045	4116.6971924314	0.9716692758674	2.2398353374921	0.433812816327543	0.664424373982468	0.761803890587036
FBgn0004047	2788.88216481711	0.907413199752149	1.58754890846927	0.571581256433282	0.567605696714269	0.686273627800457
FBgn0004049	916.199906216887	-0.524511721742595	0.279142410278882	-1.87901122304767	0.0602429608037507	0.169364226553267
FBgn0004050	692.39972995115	0.0262043596343166	0.13281661854935	0.197297295477975	0.843594895647988	0.895529343695938
FBgn0004052	8.4991294511894	-0.541182647172505	0.749016548362566	-0.722524286486848	0.469972199175295	NA
FBgn0004053	1.84427658598551	0.729193389390354	1.39934912914511	0.521094681951051	0.602300815433903	NA
FBgn0004054	1.07931402189718	1.29176483440872	3.06588558665932	0.421334977413904	0.673510492501233	NA
FBgn0004055	1059.62844477313	-0.812778758174794	0.340478532841355	-2.38716594374397	0.0169788254304369	0.0942997665348125
FBgn0004057	2297.36954731092	-0.269408805192178	0.180483950145897	-1.49270228723605	0.135515134401391	0.264289619630485
FBgn0004066	1991.59760360363	0.328909556662784	0.174642462656003	1.88333095892402	0.0596555303724837	0.168431623902079
FBgn0004087	189.821170819128	0.664840317874036	0.205532081954893	3.23472769579566	0.00121758793017332	0.0372236855225123
FBgn0004101	296.173857369733	-0.454662721131282	0.288190852064871	-1.57764452921961	0.114647296418793	0.239284455484977
FBgn0004102	282.587167443774	-0.419476747695578	0.209871019353499	-1.99873593308768	0.0456369329346682	0.147033737950922
FBgn0004103	3392.07002686799	-0.441431322271271	0.230109450722365	-1.91835372639203	0.0550661742630887	0.161388605059384
FBgn0004106	309.475271393728	0.505240943650543	0.358611848694818	1.40887967168231	0.158870751450829	0.292272487028799
FBgn0004107	140.657727403741	0.675052692804764	0.588167593600464	1.1477216700642	0.251083482384079	0.392148642196545
FBgn0004108	319.653304121688	-0.52786453000485	0.323724235173917	-1.63059935788021	0.10297488475973	0.225178179924601
FBgn0004110	4.05250511517569	-0.75974969812572	0.945237554854854	-0.803765883214811	0.421532196598025	NA
FBgn0004117	12167.6439054536	-0.260565471467591	0.157417261163173	-1.65525349343677	0.0978730883393674	0.218743088651928
FBgn0004118	369.195078712187	-0.0085717423632678	0.225279262547618	-0.0380494070618504	0.969648289386455	0.980063416017888
FBgn0004132	374.838648714946	0.811168077329808	0.222429266582342	3.64685857123715	0.000265465939805018	0.0238550427979237
FBgn0004133	706.823938793469	0.048243134661858	0.258475530538706	0.186644881089175	0.851939075013336	0.901264384021978
FBgn0004143	0	NA	NA	NA	NA	NA
FBgn0004167	8186.83389712271	-0.8471117912668	0.499020246128164	-1.6975499447957	0.0895927369949638	0.208827798508785
FBgn0004168	220.532782858426	-0.662251147287833	0.242687161919121	-2.72882645316252	0.00635601440872605	0.0641149569835812
FBgn0004169	24234.356918425	-0.0888446360359419	0.15385435239635	-0.577459361091494	0.563629183878955	0.683095756064522
FBgn0004170	0.539439547939159	1.33292960026048	2.39958142279502	0.555484213870888	0.578563504819123	NA
FBgn0004171	8476.95922602203	0.862362301123076	0.355203773435587	2.4277960022276	0.0151908850890634	0.0901610474908304
FBgn0004172	17957.7007719011	1.629530859857	0.469078765606357	3.47389602629012	0.000512959763264584	0.0285136367985132
FBgn0004173	14687.9249629686	1.49445857313867	0.432337112250065	3.45669740300774	0.000546838523383722	0.0295578144156243
FBgn0004174	10507.3332438524	1.29436357135781	0.475309280853399	2.72320281445763	0.00646523541606288	0.0645929369181029
FBgn0004175	6932.72157325238	1.23997874227623	0.417835459440065	2.96762449012324	0.00300110724471246	0.0494207335523025
FBgn0004177	4363.47490137814	-0.291164212398479	0.255203879737487	-1.14090825224907	0.253908104967357	0.395388342179665
FBgn0004179	2979.58112199524	-0.627185133691913	0.306733853919276	-2.04472093861857	0.0408823781116372	0.140806391958878
FBgn0004181	67440.0867094408	-0.052428171377085	0.167522644704342	-0.312961698220647	0.754309761809979	0.830320588409481
FBgn0004183	3.13207861817146	0.360739700186528	1.05263586020174	0.342701321345249	0.731823168568017	NA
FBgn0004185	3.20817154675008	4.11582253936014	1.51947764326704	2.70870884977991	0.00675455850871298	NA
FBgn0004186	3.03143963156613	3.33339866502255	1.31022212117512	2.54414775262143	0.0109544736638134	NA
FBgn0004187	69.0919423431332	2.15046583525377	1.24054168718869	1.73348937602181	0.0830087241830487	0.200800024309123
FBgn0004188	1.90199546076607	0.328397869958809	1.52059947988403	0.215966054377353	0.82901420783121	NA
FBgn0004189	1.95383675861596	-0.0353204073852703	1.22756938373426	-0.0287726362788762	0.977045924927535	NA
FBgn0004190	1.36789617674193	0.36496479649632	1.47598334380764	0.247268912638817	0.804700116008638	NA
FBgn0004191	34.4111551966583	4.36552684374476	1.18409852633238	3.68679357896553	0.000227097419950269	0.0235573339403531
FBgn0004192	1.8393088208471	0.101742963613394	1.43590723954604	0.0708562230284178	0.943512184720558	NA
FBgn0004197	131.967695990227	-1.17610799644037	0.691437086532294	-1.7009616917409	0.0889501808908328	0.207808065801708
FBgn0004198	1671.90774171749	-1.02476683723463	0.469672772617369	-2.18187405568319	0.0291188290982453	0.120898662004501
FBgn0004227	1865.73677151346	-0.39983221938567	0.205220382809785	-1.94830656639145	0.0513782919265058	0.156173885057634
FBgn0004228	879.420164244479	-0.148656212352316	0.389440583494668	-0.381717311067946	0.702671058302264	0.791221933865423
FBgn0004237	3760.10365973136	-0.0689686026237924	0.153157629084392	-0.450311244931781	0.65248603191552	0.75237207741401
FBgn0004240	744.418210993627	0.125966985421871	0.706223185407291	0.178367105505356	NA	NA
FBgn0004242	4562.09609309146	-0.73911925419437	0.351021566813428	-2.10562348320672	0.0352370711468584	0.131356303137723
FBgn0004244	1645.36485772373	-0.866989928023015	0.356972472661539	-2.42873048882132	0.0151517908580542	0.0900359462174136
FBgn0004359	446.992243264679	-0.464626651138221	0.279938079429604	-1.6597479417053	0.0969651703997628	0.217662284447871
FBgn0004360	110.532375407186	-0.0763666631256756	0.213548298051603	-0.357608390338104	0.720636398441311	0.804684176391408
FBgn0004362	1541.44457684384	0.396923166633102	0.536844391255738	0.739363534570334	0.459686278845041	0.594182401638989
FBgn0004363	16929.9431899047	0.233460884755735	0.11347570375186	2.05736450215149	0.0396511770565946	0.138879895811338
FBgn0004364	732.463206291363	-0.712025980653299	0.471654839890657	-1.50963357191112	0.131136950001077	0.259360183052723
FBgn0004367	140.32220051561	-0.506070795612576	0.406823589791137	-1.24395636907976	0.213515621357672	0.352488069644859
FBgn0004368	992.041354517476	-0.702276792462121	0.343945988831845	-2.04182288866716	0.0411691029662306	0.141298546518214
FBgn0004369	1430.81606381187	-0.555139908037545	0.297952779072388	-1.86318083612395	0.0624368281580085	0.172617440466585
FBgn0004370	1611.05918249398	-0.73566983554538	0.349940585444926	-2.10227068863711	0.0355295706766403	0.131961252916284
FBgn0004372	197.35116465528	0.160037520648083	0.249985275486066	0.640187788408377	0.522050520872174	0.647964345390053
FBgn0004373	3184.54300482837	-0.618405710466307	0.331755580299596	-1.86404011624416	0.0623160709856532	0.17240044374956
FBgn0004374	1018.74341811951	-0.114062290889053	0.243037489216222	-0.469319738518103	0.638841108488901	0.742487230986571
FBgn0004378	180.004539698727	-0.0822921473078567	0.39253516579619	-0.209642738991146	0.833946519903026	0.888580673989199
FBgn0004379	768.006933372627	-0.28186448942908	0.23248337529639	-1.21240707671994	0.22535659333514	0.365555488629267
FBgn0004380	641.239817206716	-0.340078023551106	0.203735805196	-1.66921088428192	0.095075593796717	0.21581361837414
FBgn0004381	431.368467552351	-0.557495781575179	0.251727610306922	-2.21467871917365	0.0267821245558784	0.116071250572901
FBgn0004387	1490.53861026926	-0.413853314744769	0.252685421462439	-1.63782030775482	0.101459183978394	0.2232542658646
FBgn0004389	0.466386820930313	-0.0856436138519455	2.75558768230248	-0.0310799813781953	0.97520575450244	NA
FBgn0004390	647.495356652958	-0.451672604289147	0.415377547989906	-1.08737847405301	0.276869580390144	0.418913500868239
FBgn0004391	526.59480909316	-0.53868582520346	0.316930522335089	-1.69969689645073	0.0891879534258251	0.208215860080067
FBgn0004394	70.0515177776866	-0.391468404228832	0.240375839380337	-1.62856801764269	0.10340449934954	0.225799912884277
FBgn0004395	693.395498997843	-0.67641765646892	0.463517758546897	-1.45931335746327	0.144478880622561	0.2746954500392
FBgn0004396	1019.56416596836	-0.732576715295503	0.307783700461678	-2.38016735193134	0.0173047770931363	0.0951399647182637
FBgn0004397	1415.92842577161	-0.166758546397442	0.202207643662458	-0.824689627835281	0.409547821806739	0.548701617459776
FBgn0004400	37.6517955845959	0.588397242958938	0.74297226876267	0.791950477423393	0.428389552640701	0.565888295045483
FBgn0004401	4149.26348216754	-0.148175811065852	0.190118211350553	-0.779387782018606	0.435751318865948	0.57285579031434
FBgn0004403	9313.07508354447	0.90176924940786	0.249031317654144	3.62110781046519	0.000293344233586127	0.0238550427979237
FBgn0004404	3147.91333039727	0.82483193649541	0.344884683754468	2.39161660505234	0.016774354630901	0.0939563554028443
FBgn0004406	247.412037166446	-0.0598467764305881	0.250439467121879	-0.238967033105301	0.811131145995474	0.871246776791225
FBgn0004407	0	NA	NA	NA	NA	NA
FBgn0004414	8373.96229827493	1.38006741199502	0.540078664916976	2.55530814609603	0.0106093829291392	0.0786539171122565
FBgn0004419	3660.84354385839	0.494662504787273	0.56115915272432	0.881501268197767	0.378046567906468	0.520253367345639
FBgn0004425	437.849460291336	1.25220093841026	0.510713662725792	2.45186496818391	0.0142117982277832	0.0882901315921992
FBgn0004426	3660.25531868547	0.422964661315345	0.41443015986404	1.02059334063453	0.30744714585174	0.450685289802028
FBgn0004427	10344.1351309792	1.21063191375627	0.423593650027211	2.85800297921958	0.00426316388884874	0.0556489804704018
FBgn0004428	1300.65961132476	1.25931383725247	0.550442299408372	2.28782170012371	0.0221479065863262	0.10668245753867
FBgn0004429	533.910692093346	0.0699293208237538	0.2349811811499	0.297595409477257	0.766011978627465	0.839106118509454
FBgn0004430	7.6976432988899	0.451592091644657	0.845583478941026	0.534059738501765	0.593300203953059	NA
FBgn0004431	146.033381253323	0.934969158514811	0.532527657286084	1.75571943677008	0.0791363263163831	0.195305725532415
FBgn0004432	12861.9566988203	0.33488391311011	0.148612488442311	2.25340357745309	0.0242337141768979	0.111242845297926
FBgn0004435	1611.52023936505	0.189574463997979	0.191871415333845	0.988028694467755	0.323138595325072	0.466114951802529
FBgn0004436	2591.31665524088	-0.237506792459626	0.157439636288635	-1.50855780703281	0.131411823506406	0.259536037091463
FBgn0004449	2716.9347527636	-0.796646471069398	0.446770227064811	-1.78312345543525	0.0745662090627505	0.189075030443058
FBgn0004456	1023.73218780199	-0.917180276746586	0.389360805278148	-2.35560504373669	0.0184925677676342	0.0979342279976149
FBgn0004462	597.130717610973	-0.466822215719509	0.314807015951095	-1.48288377344179	0.138105293333009	0.267637413116955
FBgn0004463	306.828188777348	0.0328269726752951	0.171436653326891	0.191481646650564	0.848148258353324	0.89855288745852
FBgn0004465	846.726159467585	0.238190999380724	0.128984236897809	1.84666750844474	0.0647953435012072	0.17589405631257
FBgn0004507	11945.8201049464	-0.20777931072556	0.188795289614591	-1.10055346799024	0.271091046884354	0.412968715501211
FBgn0004509	1884.35507202203	-0.755025415977067	0.384786324081841	-1.9621939989127	0.049739902349148	0.153666008001713
FBgn0004510	248.540865203131	-0.306232862595177	0.293366235255801	-1.0438585828671	0.296550822740443	0.439653447983637
FBgn0004511	1.86363652077333	0.132686757687245	1.375243584865	0.0964823680310207	0.923137476863642	NA
FBgn0004512	1879.38613017962	-0.302828626850541	0.236508938987953	-1.28041091447274	0.200400657403794	0.33751959353587
FBgn0004513	568.701634295622	-0.500583451821124	0.206264474392146	-2.42690096438723	0.0152284122318228	0.0902470097804917
FBgn0004514	117.660705262441	-0.431018226485891	0.237287268760648	-1.81644059007928	0.0693028135215678	0.182052894383477
FBgn0004516	3180.98531220096	-0.946110316436769	0.270679271211115	-3.49531869287048	0.000473496022211736	0.0273372195412908
FBgn0004552	265.827508889975	0.661562165647001	0.321785140724037	2.05591272536216	0.039790929304124	0.139157340762551
FBgn0004554	15.6123262703249	-0.410063881276688	0.452983903118296	-0.905250448092854	0.365332721217773	NA
FBgn0004556	211.082442414901	0.171926379929329	0.293985654067889	0.584812141512275	0.558674039502002	0.679152145095448
FBgn0004567	34.75048108205	-0.581870163664591	0.422575044123627	-1.37696291287462	0.168523714452495	0.30259389589712
FBgn0004569	286.862056959536	-0.413842508565257	0.236127848664533	-1.75262050158769	0.0796671697787735	0.195955058750105
FBgn0004573	144.600843863912	-0.737901175866122	0.255418627339702	-2.88898732074355	0.00386484657495418	0.053595251345733
FBgn0004574	2410.69011188751	-0.45292313991115	0.210641228948377	-2.15021124863523	0.0315385087917755	0.125411504625068
FBgn0004575	2330.646578313	-0.85557373874161	0.307474871608384	-2.78258100984366	0.00539284002348803	0.0600551770662986
FBgn0004577	11.130607178405	0.466113444539252	0.990945201232681	0.470372573538307	0.638088855468929	NA
FBgn0004580	2132.83680093264	-0.64130636137248	0.225064327873574	-2.84943583655213	0.00437968387454307	0.0559042916934675
FBgn0004581	651.749530347529	-0.2619691686767	0.17540387500009	-1.49351984770328	0.135301162818118	0.264028665229727
FBgn0004583	701.740289679112	-0.854507173694827	0.464086181452341	-1.8412682985317	0.0655822509627219	0.176827788412382
FBgn0004584	329.947573811447	-0.0933767215243874	0.283438855226917	-0.329442205267275	0.741821471344502	0.821310725818752
FBgn0004587	4103.38335518384	0.066388802293172	0.150706334607522	0.440517662817992	0.65956222250617	0.757878126410492
FBgn0004588	0.171894533145567	1.05472334163559	3.81693625648277	0.276327208725118	0.78229675962364	NA
FBgn0004589	49.0339338097454	0.900393813496988	0.520749432719542	1.72903465068566	0.0838028936750259	0.201868590468969
FBgn0004590	1.38786530064418	1.23083491866811	1.4488939738677	0.849499646535558	0.395603326799174	NA
FBgn0004591	0	NA	NA	NA	NA	NA
FBgn0004592	0.171894533145567	1.05472334163559	3.81693625648277	0.276327208725118	0.78229675962364	NA
FBgn0004593	0.566406699644149	0.904153443032088	2.27821124955212	0.396869887816522	0.691463410585396	NA
FBgn0004594	2.39137775895093	-0.0185274242980274	1.34676667979023	-0.0137569666491253	0.989023874921111	NA
FBgn0004595	4173.87726794262	-1.13591689787504	0.456550925987988	-2.48803985101309	0.0128449338912893	0.0849920437387468
FBgn0004597	228.156850737185	0.13052778311405	0.157494794984937	0.828775218422512	0.407231613565257	0.54698911879167
FBgn0004598	1471.29218694696	-0.325583568676908	0.372600009131049	-0.873815246103217	0.382218876242821	0.523969976651709
FBgn0004606	644.870049168942	-0.798371261762367	0.417699751807488	-1.91135201375539	0.055959358969796	0.162811085483236
FBgn0004607	572.404740862454	-0.766672483810262	0.414646375254207	-1.848979105003	0.0644608299421562	0.175166454962452
FBgn0004611	2340.86790484553	-0.585041565801017	0.300859923153225	-1.94456463216958	0.0518273994945609	0.156464781888496
FBgn0004618	193.993129873712	-0.332524222016049	0.202534114738078	-1.64181832994445	0.100627659166393	0.222092273723917
FBgn0004619	188.505387988317	-0.221678184074773	0.159713107836933	-1.38797739945745	0.16514392722997	0.299293246503822
FBgn0004620	266.629891533933	-0.359739218993575	0.172000141184858	-2.09150537037609	0.0364827855227264	0.133284585822628
FBgn0004622	130.840003186884	-0.412014508071109	0.183360714275123	-2.24701626899698	0.0246389873950052	0.111697873345423
FBgn0004623	4161.85164266358	0.033218871380002	0.152756158128992	0.217463386006022	0.827847237963008	0.883369295968702
FBgn0004629	7407.4767787001	1.03760575432784	0.339286763246697	3.05819697885884	0.00222673154184552	0.0451802710139282
FBgn0004635	205.100545929288	-0.638659319048766	0.380240932241193	-1.67961748695602	0.0930317631177601	0.213296283904172
FBgn0004636	1931.01088489224	-0.510860126792557	0.38288851680371	-1.33422681635149	0.18212953356326	0.317576943526933
FBgn0004638	1406.84201956855	-0.355047565693103	0.26378662810271	-1.34596498786458	0.178313808293392	0.313799907889012
FBgn0004643	418.511179871019	0.066654908545825	0.242539324375197	0.274821036619665	0.783453735287503	0.851300999131107
FBgn0004644	102.440561190155	-0.645449526583652	0.291422364066532	-2.21482496256291	0.0267720811320393	0.116071250572901
FBgn0004646	1661.72228406109	-0.53935394951606	0.223628337833617	-2.41183185789874	0.0158725996140736	0.0917597122035472
FBgn0004647	569.889200184771	-0.742329702327551	0.471913168169457	-1.5730218023096	0.115713769956442	0.240443723250183
FBgn0004648	2826.67209430178	-0.686481488065861	0.336352862461027	-2.04095628335972	0.0412551725996241	0.141372529876577
FBgn0004649	463.581281470559	0.630209869951756	1.43297915222187	0.439789978084888	0.660089226871684	0.758219153789133
FBgn0004650	477.488680202662	-0.561584245687029	0.453888412192594	-1.23727381136299	0.215985446993708	0.355540707071736
FBgn0004652	1330.93063981129	-0.551966478490442	0.223449469259724	-2.47020715833015	0.0135034828551254	0.0867830468466476
FBgn0004654	3497.85989705808	-0.242388661196337	0.198278891191917	-1.22246326746766	0.221532486551248	0.361633466094639
FBgn0004655	1133.75663952223	-0.537494089448095	0.394611137944942	-1.36208545011491	0.17317091953751	0.307791917699292
FBgn0004656	4317.24295206206	-0.722282885814008	0.356275953440761	-2.02731303877937	0.0426304088972081	0.142758771431576
FBgn0004657	2346.1707759749	-0.556366394358044	0.284310819973694	-1.95689490259119	0.0503598259973359	0.154395859543067
FBgn0004666	80.4592054317819	-0.523749904563002	0.403712895286915	-1.29733261106455	0.194516768356353	0.330912309958415
FBgn0004687	2871.86424456961	-0.45920223563843	0.305938596147877	-1.50096209311385	0.133365366342552	0.262036590036805
FBgn0004698	1186.90859140247	-0.447510454517117	0.302468904776237	-1.47952548989517	0.138999923937974	0.268467108178243
FBgn0004777	56.9740841586948	0.923692202904041	0.755333503344777	1.22289319726152	0.221370038291995	0.361510793490234
FBgn0004778	3.95082637209249	1.8357157226192	1.08455118076516	1.69260405149721	0.0905308593813811	NA
FBgn0004779	0.749166873187587	0.336832654039956	2.64365027691259	0.127411956483642	0.898614353460756	NA
FBgn0004780	14.3257455625714	-0.813585882935887	0.560582996501868	-1.4513210140386	0.146690492439737	NA
FBgn0004781	3.1136196170751	-0.0450255912638698	1.02274522769704	-0.0440242496806911	0.96488507415362	NA
FBgn0004782	6.60501937378987	3.77401234760499	1.31837480252977	2.86262475614916	0.0042014782062639	NA
FBgn0004783	1.90279793717435	4.67717452449872	2.21782005393498	2.10890622807753	0.0349526765189368	NA
FBgn0004784	3141.89585101804	-0.0773053780386308	0.127347248653869	-0.607043959377146	0.543821739340505	0.66688146644995
FBgn0004795	1119.03103752357	-0.47189837541098	0.306002339415388	-1.54213976374342	0.123039633969531	0.2490281361061
FBgn0004797	848.93680032632	-0.455852102969254	0.342549101464785	-1.3307642642178	0.183266589920781	0.318684537436162
FBgn0004811	744.350008255828	0.477284217564075	0.174971045870121	2.7277897048084	0.00637602418485555	0.0642675918984598
FBgn0004828	6276.90149634669	-0.344638839429429	0.276415268586717	-1.24681549319447	0.212465158272313	0.351329500463723
FBgn0004832	416.135343061196	0.581622040696587	0.162279098502016	3.58408474082915	0.000338262259429862	0.0244688842324728
FBgn0004837	314.181439169785	-0.236151894457988	0.268157571615536	-0.880646006134649	0.378509449457488	0.520781565237906
FBgn0004838	10273.6400211779	-0.680707368762669	0.465420140868364	-1.46256534470689	0.143586351805232	0.273630348427908
FBgn0004839	157.634929119319	-0.974071717689178	0.400371978715411	-2.43291681104776	0.0149777416088436	0.0896079781811561
FBgn0004841	68.0544187968919	-0.157018902173892	0.27940284417861	-0.561980328566434	0.57412942185666	0.690801078047277
FBgn0004842	38.5615596131505	-0.673365198017885	0.316230837275725	-2.12934704223918	0.0332255584476018	0.128388654146675
FBgn0004852	1392.34411557163	-0.693713609545351	0.295642660884188	-2.34645976825753	0.0189527121988641	0.0989999937120563
FBgn0004854	86.5631563325505	-0.477982386303788	0.2991052794407	-1.598040620338	0.110033937238095	0.233842085687154
FBgn0004855	365.974119880043	0.599277465299434	0.235982958416862	2.53949467080083	0.0111012736575888	0.0801699059279202
FBgn0004856	743.11601428822	0.0438380628558986	0.148734749929023	0.294739883428845	0.768192593265845	0.84012694867045
FBgn0004858	596.544232126386	-0.435633935255107	0.229976388471344	-1.89425505005436	0.0581911642722357	0.166618213023785
FBgn0004859	561.013329003174	-0.834567380599459	0.426029367582925	-1.95894331260394	0.0501194258791102	0.154089455433232
FBgn0004860	303.07799582743	-0.537130975058394	0.251630947437575	-2.13459823017853	0.0327938421456242	0.127667280267865
FBgn0004861	450.950622726411	-0.567754614382784	0.24727068840435	-2.2960853874211	0.0216709996373849	0.105849441277669
FBgn0004862	45.296839257076	0.2898475641192	0.397574022632274	0.729040499678941	0.465976889158168	0.599900277315519
FBgn0004863	36.0502329009369	-0.185518255046994	0.348016812278239	-0.533072680691851	0.593983269468054	0.706703439953203
FBgn0004864	681.154434553606	-0.629261303399008	0.346677131280244	-1.81512204475446	0.0695051561212254	0.182390090005415
FBgn0004865	274.25069087009	-0.712364065637439	0.281090098629408	-2.5342908523314	0.0112675166113069	0.0805914701376815
FBgn0004867	21746.9578666042	1.16805156629848	0.381490609061129	3.06180948771746	0.00220003427790792	0.0449579755267579
FBgn0004868	4518.2976312843	-0.00391270699141736	0.106997305194378	-0.0365682760356374	0.970829238659876	0.980880772306558
FBgn0004870	138.786893195435	-0.749005374851834	0.353290364781202	-2.12008435417055	0.0339989321573609	0.129713041944294
FBgn0004872	142.168209130768	0.434536054619239	1.03840665238605	0.418464243868971	0.675607723936351	0.770602264514068
FBgn0004875	3122.23687140757	-0.654330846818098	0.322055090926057	-2.03173576587967	0.0421804130675115	0.142224170196634
FBgn0004876	3722.08416088845	-0.5502171444047	0.245254621857494	-2.24345270330687	0.0248676365507184	0.112347820274062
FBgn0004878	1.81281039642369	2.22741098186479	1.53342872524748	1.45256896860681	0.146343467123432	NA
FBgn0004880	908.874047654034	-0.877050331156989	0.389054909980445	-2.25430988957592	0.0241766796138951	0.111168482276133
FBgn0004882	6982.91716105481	-0.223711976399968	0.179402229098386	-1.24698548911163	0.212402818311195	0.351329500463723
FBgn0004885	1244.41789349884	-0.434486761022763	0.26602035813909	-1.63328387369356	0.102409306832408	0.224445218467833
FBgn0004888	6435.49945825212	0.28240048119668	0.139666124206626	2.02196833914348	0.0431796228081005	0.143325422347388
FBgn0004889	2411.61654376901	-0.53210814627117	0.326582380196594	-1.62932288616078	0.103244683752858	0.225525694538244
FBgn0004892	100.899898831679	-0.430991493646442	0.219022487310208	-1.96779563112173	0.0490915570802691	0.152603155492087
FBgn0004893	959.113936763119	-0.485138363206626	0.198873433245047	-2.43943273513487	0.0147103410019154	0.0894259130007486
FBgn0004895	6.47963201976983	0.296271236600292	0.73146228644649	0.405039661087114	0.685448357921272	NA
FBgn0004896	34.5073253279369	-0.0427185167901007	0.334256788614727	-0.127801493477935	0.898306068133069	0.931246784827278
FBgn0004897	5.96578005403526	-1.30636739972558	0.92093815845124	-1.41851804894535	0.156039572998098	NA
FBgn0004898	11.2798261270639	-0.524931712914007	0.487138944040436	-1.07758108715372	0.281220746166654	NA
FBgn0004901	231.323082435306	-0.0396895934505829	0.377215342902371	-0.105217335925955	0.916203354996939	0.942973671775756
FBgn0004903	1853.9188134829	-0.554511690710692	0.252726641617913	-2.1941164855466	0.0282270364031946	0.11889216495891
FBgn0004907	14702.6246612193	-0.434561883987369	0.282030835471184	-1.54083110544049	0.123357896868688	0.249451346439222
FBgn0004908	550.298257013171	0.692849576149934	0.255055537735203	2.71646552865378	0.00659830660092013	0.0652939472399558
FBgn0004910	1499.92275292729	-0.592461205662625	0.319968196038475	-1.85162529588217	0.0640796480307903	0.174598817612747
FBgn0004911	16.6279957180557	0.200402551436945	0.71467329817969	0.280411415883846	0.779161879633642	NA
FBgn0004913	1307.55430158348	-0.265194184449096	0.23768866498826	-1.11572078736777	0.264541669706393	0.406564623974804
FBgn0004914	1817.23623890334	-0.814207110688128	0.370796077652588	-2.19583528456573	0.0281037351430143	0.118796800001886
FBgn0004915	963.537967470054	-0.0997965610507802	0.190535560223845	-0.523768691437635	0.600439431943096	0.711988215699221
FBgn0004919	704.899938151908	-0.406000953263508	0.176588748375626	-2.29913262876689	0.0214974092012352	0.10555604503059
FBgn0004921	8172.36641275318	-0.108950377499683	0.12816263524574	-0.850094704207512	0.395272435687957	0.535997623187818
FBgn0004924	2313.35206792958	-0.470138294579035	0.366189438189817	-1.28386634224916	0.199188725743939	0.336079952990607
FBgn0004926	2791.5646209681	0.556900130364045	0.173997455321451	3.20062226964872	0.00137131173673729	0.037715367055902
FBgn0004956	190.913304560497	0.47352992773728	0.284012938150579	1.66728294429398	0.095458156430414	0.216169592316688
FBgn0004957	179.67973272304	-0.0385715552822057	0.23290382966492	-0.165611511574107	0.868462687474674	0.912297858607077
FBgn0004959	15.1927540967688	0.0104519593181277	0.615033897399335	0.0169941191246917	0.986441307354369	NA
FBgn0005198	860.887060670871	-0.497958498695969	0.291356895859713	-1.70910146892742	0.0874321555471292	0.205773023206299
FBgn0005278	5286.04023058944	-0.605159716526282	0.372440529916153	-1.62484925220819	0.104194683582208	0.226324940067931
FBgn0005322	1097.46272604059	0.240341921387837	0.145483621666634	1.65202047237018	0.0985303775109008	0.219627829831326
FBgn0005355	370.444923069448	0.0932402515617198	0.189092679755218	0.493092866854603	0.621946970784312	0.730000836877453
FBgn0005386	1372.39784481949	-0.761309845754092	0.438427593673481	-1.73645513361798	0.0824833909381661	0.200043481630965
FBgn0005390	58.9560962256207	0.73136754651944	1.73477950875315	0.421591068391799	0.673323526671955	0.768795643991709
FBgn0005391	1995.38783460624	0.932729947495599	1.95832181436879	0.476290434315689	0.633867479275025	0.738713538411828
FBgn0005411	1418.88778963201	0.181553952241525	0.129419387760408	1.40283426914083	0.160666265386848	0.294076515148365
FBgn0005427	859.879782108805	-0.594646557760198	0.376345139434654	-1.58005643078977	0.114093943858996	0.238620990061662
FBgn0005533	16033.3094308749	1.27075795207075	0.37632186367268	3.37678480774116	0.00073338402210603	0.0314710133785825
FBgn0005536	4305.01641859512	-0.627729048972619	0.281452006724395	-2.23032358617115	0.0257259684390892	0.114074713936057
FBgn0005558	180.083017269894	0.0414625703657021	0.195038114776955	0.212587013636379	0.831649101536703	0.886419519712341
FBgn0005561	204.474624430537	-0.722761771250024	0.486168579197178	-1.48664846346825	0.137107680805462	0.266181160584362
FBgn0005564	540.871690109308	-0.230437795878324	0.159989400201784	-1.4403316443945	0.149773592662598	0.281431651652697
FBgn0005585	16701.697699257	0.641468022266185	0.274989712078846	2.33269825775249	0.019663987707093	0.100798978230834
FBgn0005586	1448.1034099617	-0.745544457370197	0.273579484714844	-2.72514753124596	0.00642727605626816	0.0644881452896243
FBgn0005590	1.12280830973806	-0.195519588979645	2.6464214774071	-0.0738807444879151	0.941105277642358	NA
FBgn0005592	87.7550594835447	-0.578739866543083	0.379522994685314	-1.52491383828522	0.127280589808666	0.254827912078809
FBgn0005593	19688.5512892767	0.966129496815618	0.302737713816805	3.19130868974009	0.00141629871586992	0.038365744785691
FBgn0005596	489.298653364484	-0.215792719710406	0.353249585254287	-0.610878904656229	0.54127975143505	0.665026487644494
FBgn0005612	757.1535388746	-0.484517348808932	0.253943801502969	-1.90797076337879	0.0563949951529457	0.163676185032504
FBgn0005613	103.616510951407	-0.466770532980213	0.249820454526816	-1.86842400020576	0.0617029943487085	0.171492668259469
FBgn0005614	8567.04670690293	0.0610180717717218	0.274986208309844	0.221895025742415	0.824395602896769	0.880897694262474
FBgn0005616	556.093073942404	-0.509881918895696	0.240488621408623	-2.12019144984551	0.033989903182088	0.129713041944294
FBgn0005617	555.374127085621	-0.458825376495621	0.485344056021436	-0.945361070776885	0.344474569638379	0.486764773186314
FBgn0005619	472.751244256797	-0.353508120010694	0.171112742624762	-2.065936847181	0.0388344430618618	0.137615343916262
FBgn0005624	154.448672912756	-0.556259077801674	0.40837070704682	-1.3621424558689	0.173152931919247	0.307791917699292
FBgn0005626	1202.7247340579	-0.939347010920835	0.336097332718212	-2.79486600897364	0.005192123000344	0.0593833346099993
FBgn0005630	5339.8140665501	-0.490609563396491	0.378961343949225	-1.29461638035099	0.195452598828572	0.331730551013606
FBgn0005631	717.370292374617	-0.794380297718665	0.335396307620588	-2.36848253743239	0.0178612235373728	0.096382381842973
FBgn0005632	3896.76404824051	-0.640436597211957	0.39484452941253	-1.6219968861284	0.104804014868159	0.227198961966946
FBgn0005633	541.013221673975	0.977975001427776	1.08792703406003	0.898934368583599	0.368687620219196	0.51057402594005
FBgn0005636	462.825401322086	-0.129119095660696	0.223151243264524	-0.578616967451252	0.562847653345266	0.682274106106968
FBgn0005638	83.3799895954531	-0.414741434239052	0.263734554537835	-1.57257146287046	0.115818079790484	0.240553241832103
FBgn0005640	1137.88674985381	-0.595123107894013	0.316424910478575	-1.88077198787517	0.060002942231369	0.168941816831813
FBgn0005642	541.162928936796	-0.234136400323738	0.211632256873338	-1.10633607457992	0.268581083118862	0.410521776193049
FBgn0005648	952.82953812606	-0.318829465907692	0.267752954699416	-1.19075984153234	0.233747878181128	0.373622245469325
FBgn0005649	2243.3295415322	-0.263437265416644	0.268093001563785	-0.982633876602579	0.325787665177028	0.468653275938214
FBgn0005654	0	NA	NA	NA	NA	NA
FBgn0005655	265.168364595212	0.770436956377376	0.528741015029279	1.45711593100965	0.145084381529265	0.27555437245466
FBgn0005658	148.041286443158	-0.788704755880405	0.243377201532152	-3.24066819289239	0.00119249900059057	0.0371597150143604
FBgn0005659	533.932030733425	-0.579882889998486	0.279082735187689	-2.07781713766172	0.0377262047590029	0.135793721719974
FBgn0005660	193.34736449832	0.133240663897024	0.276962455925829	0.481078431557185	0.630460756625066	0.735993797765053
FBgn0005664	274.28556195298	-0.0991366253905575	0.231422247887602	-0.428379839429726	0.668374600168051	0.765369135400493
FBgn0005666	26801.1529818155	-0.685604810211689	0.41072560022161	-1.66925268315821	0.0950673132356346	0.21581361837414
FBgn0005670	128.926551881333	0.445242115961336	0.367368641954153	1.21197637771408	0.22552142318734	0.365710815838815
FBgn0005671	13380.1849095647	-0.399164845202105	0.16254298639588	-2.45574942390884	0.0140591150435959	0.0880544595073104
FBgn0005672	1166.80812913489	-0.150189653717464	0.152567487195959	-0.984414546492197	0.324911728658692	0.467853001787038
FBgn0005674	1516.66602971579	-0.307959754720413	0.269976167063274	-1.14069237322062	0.253997961486684	0.395463984961196
FBgn0005677	355.798664967151	-0.625352115668571	0.280071102817436	-2.23283341043651	0.0255599321437985	0.113738088102606
FBgn0005683	165.602617809272	-0.0648994351093023	0.317789249228529	-0.204221619412404	0.838180317512607	0.891433559611777
FBgn0005694	909.065926740983	-0.384322261475364	0.34035004069511	-1.12919704869272	0.258814718462548	0.400425731183277
FBgn0005695	395.626632949607	0.0258489329371501	0.427010458799191	0.0605346599936701	0.951729811771842	0.967949063503315
FBgn0005696	62.7728009662822	0.502005246154185	0.809509573009891	0.620135033471742	0.535168888953462	0.659709454764939
FBgn0005771	836.243963714937	-0.832141423874581	0.312174013482382	-2.6656332299791	0.00768434767641522	0.0702861734374646
FBgn0005775	409.599659028285	-0.542475383443076	0.196532574970735	-2.76023139433173	0.0057760434207288	0.0622188029637622
FBgn0005777	1532.72092405952	-0.272613295983591	0.239892370125729	-1.13639835998416	0.255789881863666	0.397332378690242
FBgn0005778	662.895719247231	0.0342523183780127	0.215646380887505	0.158835581830983	0.873798414413421	0.915345656072364
FBgn0005779	469.859434183453	0.282448394136462	0.203079476235169	1.39082687907557	0.164277930202309	0.29825272703422
FBgn0008635	2146.53564373413	0.0924763425319213	0.185916579708936	0.49740772273618	0.618901560722966	0.727788017581394
FBgn0008636	38.8623376255329	0.0148507374424017	0.423246653314367	0.0350876665559155	0.972009836020259	0.981511934511365
FBgn0008646	52.2611565930856	0.128963166410583	0.328028363090544	0.393146388914505	0.69421136349071	0.785159727217257
FBgn0008651	108.420628163693	-0.354983183434162	0.212458703027049	-1.67083380617723	0.0947545090908255	0.215520701443808
FBgn0010014	500.29032493427	-0.0247640039492547	0.200393023221136	-0.123577176246936	0.901650064660374	0.933905020193079
FBgn0010015	428.694544563985	-0.0494968455740187	0.149881632823643	-0.330239567327498	0.741218951878795	0.821055954935781
FBgn0010019	349738.380495629	-0.711331816329777	0.354886794608153	-2.00439077231711	0.0450282170180348	0.146190278956733
FBgn0010038	103.585756961425	1.19172008746416	0.46421571648073	2.56716876476893	0.0102532696574461	0.0780338385136886
FBgn0010039	726.622541232757	0.0762087454522663	0.138628707096728	0.549732786579996	0.582502665443883	0.697943621151224
FBgn0010040	9.07786566374647	2.47184973055891	0.728579117331727	3.3926991204628	0.000692076109899639	NA
FBgn0010041	343.47714004146	-0.28404279113956	0.288415240698193	-0.984839741658422	0.324702796078133	0.467705514490852
FBgn0010042	15.4333901657937	0.241946101885042	0.536212279406867	0.451213280965276	0.651835838566168	NA
FBgn0010043	63.759541696776	1.43376050936598	0.395148051474354	3.62841346178074	0.000285168305087624	0.0238550427979237
FBgn0010044	113.229812545212	0.612192981781189	0.479995014106592	1.27541529347061	0.20216228840316	0.339723919690019
FBgn0010051	1952.73146087918	-0.787548829969028	0.432294497529059	-1.82178777308191	0.0684871936887703	0.180784609280186
FBgn0010052	139.855020597069	-0.162215376116956	0.304499928199938	-0.53272714077766	0.59422247559804	0.706779242824898
FBgn0010053	2252.53605014899	-0.0390528847649345	0.156531276929803	-0.249489338686274	0.802982286723407	0.865174502763897
FBgn0010078	20832.2830059342	1.10256510250067	0.210521596750568	5.23730163327149	1.62941277246108e-07	0.00035776473107337
FBgn0010097	31.6728300903634	0.977300713612176	1.56410893330612	0.624829059409831	0.532083256149517	0.656827662716805
FBgn0010100	19582.4714205272	-0.321206438302062	0.188707109628232	-1.7021427488072	0.0887286119217826	0.207511225538357
FBgn0010105	263.603234265884	-0.222754161419739	0.139529499559043	-1.59646642554952	0.110384695956229	0.234374031044729
FBgn0010109	2.77423520725497	0.631223576938909	1.30128787164824	0.485076047115836	0.62762240235928	NA
FBgn0010113	1489.12863275257	-0.727631741134542	0.390823230601263	-1.8617924528568	0.0626323507293547	0.172804426902941
FBgn0010114	1880.5778335236	-0.442286115371901	0.228629506129512	-1.9345102163732	0.0530504271766341	0.158681300770414
FBgn0010173	1241.46955581763	0.0531488595627632	0.269631015344471	0.197117010054879	0.843735972472175	0.895601521506222
FBgn0010194	188.721382302152	-0.670800826017548	0.372230059771972	-1.80211352739346	0.0715275458311501	0.185132078529393
FBgn0010197	44.3449500605273	-0.774263224707174	0.406694726454068	-1.90379460156246	0.0569369398918612	0.164456752057746
FBgn0010198	15312.4345297999	0.654316311857213	0.150915398440968	4.33564976547541	1.45330184857141e-05	0.00660199950106197
FBgn0010213	3160.30480874892	0.678582369053679	0.281411724547309	2.41135073581343	0.0158935560008044	0.0917597122035472
FBgn0010215	1760.9847818584	-0.629599428047279	0.353831632738334	-1.77937575330604	0.0751781789075023	0.189934504716851
FBgn0010217	34385.2470730708	-0.171969591906755	0.204307526398206	-0.841719318609819	0.399945082116277	0.540453022033012
FBgn0010220	357.03714193114	-0.0874113474732611	0.134824570271145	-0.648333959436832	0.51676897413434	0.643774417517332
FBgn0010222	463.477821873207	0.697057303852617	0.239097697280137	2.91536602728514	0.00355271603257147	0.0523528870392579
FBgn0010223	291.556393746409	-0.376178574083172	0.286751018018277	-1.31186482504203	0.189565747665687	0.325259072642324
FBgn0010225	6408.64785416215	-0.273652371637667	0.235771224908742	-1.16066908395453	0.245776499111484	0.386517798650434
FBgn0010226	9227.47647192483	-0.131469595366916	0.110974316280932	-1.18468488721391	0.23614205997382	0.376034751371341
FBgn0010228	2408.35470071603	-0.127883281232355	0.223512307513016	-0.572153196641791	0.56721819238109	0.685974791370396
FBgn0010235	1497.73866468137	-0.110677728428225	0.197236561040218	-0.561142051172026	0.574700703427894	0.691248743439409
FBgn0010238	1102.97893997258	-0.405741916131664	0.220625612324579	-1.83905173953578	0.0659075763777994	0.177138440279764
FBgn0010240	208.401546690711	-0.0233877023551546	0.20558715948313	-0.11376052090974	0.909427635111995	0.938970164077338
FBgn0010241	902.366497393294	-0.767808770581651	0.363499288302006	-2.11227035455358	0.0346632670809353	0.13043527007262
FBgn0010246	3465.28421556007	-0.651980534032017	0.327491983896359	-1.99082898541525	0.0464996915797426	0.148199733565908
FBgn0010247	1105.15109572203	-0.590261374423072	0.452523333187831	-1.3043777660368	0.192104812177491	0.328247574011189
FBgn0010258	578.784912543408	0.206837918189407	0.233555679203041	0.885604318829657	0.375830783493393	0.518069974023434
FBgn0010263	7223.83704783774	-0.354084807291239	0.198970854075429	-1.77958128056789	0.0751445119979944	0.189934504716851
FBgn0010265	18340.9009301863	0.842585889286093	0.291109577957912	2.89439425248974	0.00379890844493939	0.0531847182291515
FBgn0010269	490.740651507614	0.0635689011206773	0.128714905917935	0.493873655637111	0.621395410891904	0.72954807333831
FBgn0010278	666.959768723781	0.171669652371587	0.174951385135543	0.981242030399396	0.326473402004552	0.469434686532195
FBgn0010280	2169.08773228464	-0.536029223789182	0.269160803474475	-1.99148322069864	0.0464277881162777	0.148199733565908
FBgn0010282	1017.56953562895	0.175851648608575	0.13464297597838	1.30605883694083	0.191532549773101	0.327652228374346
FBgn0010287	261.355692474001	-0.165306229105218	0.156102001449955	-1.05896290611119	0.289616673407223	0.432292097832173
FBgn0010288	4292.64456033049	0.403903711119574	0.200784330271915	2.01162964546377	0.0442589919533164	0.145119933522041
FBgn0010292	381.694096935402	0.235231938792699	0.174912678137033	1.34485356520817	0.178672528162308	0.314017144264869
FBgn0010294	0	NA	NA	NA	NA	NA
FBgn0010295	0	NA	NA	NA	NA	NA
FBgn0010296	0	NA	NA	NA	NA	NA
FBgn0010300	820.279561067444	-0.713105909931133	0.494722476007228	-1.44142614195825	0.149464329244425	0.281171365624169
FBgn0010303	1015.15401134219	-0.518706546471498	0.322959456868781	-1.60610421970783	0.108251012903244	0.231474693960214
FBgn0010309	534.408359675985	-0.534248849959806	0.213275566134691	-2.50496978928383	0.0122461852938551	0.0833843507702927
FBgn0010313	1528.06859054706	-0.603720134788481	0.312118883594944	-1.93426340577318	0.0530807500925597	0.158681300770414
FBgn0010314	179.180059431394	0.277123876676233	0.266039047273208	1.04166617463353	0.297566476563002	0.440561441900763
FBgn0010315	324.837653081842	-0.349863621505461	0.467975825828151	-0.74761045805374	0.454695154805383	0.589930467737454
FBgn0010316	421.224362646703	-0.117153155034796	0.240025073005163	-0.488087155095985	0.625488108936267	0.732720998321749
FBgn0010317	49.5540508983485	-0.13997360679835	0.613000244057683	-0.228341845138284	0.819380495979572	0.877603142604462
FBgn0010323	13.9108671144984	1.61885046707297	0.627041524964064	2.58172768887316	0.0098307119858425	NA
FBgn0010328	1572.9444003362	-0.260055807747492	0.309043794780581	-0.841485291533291	0.400076121543235	0.540532757188926
FBgn0010329	264.834809732562	-0.771019381083117	0.219114175221509	-3.51880192280426	0.000433500236748548	0.0261969363253458
FBgn0010333	1336.03275835242	-0.192661782990763	0.259675172607274	-0.741933782334055	0.458127456536342	0.592974697300236
FBgn0010339	1071.6776826524	0.50633458738273	0.173053387320306	2.92588660195106	0.00343476112056265	0.05165713369644
FBgn0010340	309.318008891924	0.127695873242955	0.174569888142841	0.731488543651175	0.464480799631164	0.598383537486891
FBgn0010341	1622.69040167057	-0.628662325339577	0.361896680078676	-1.73713205990977	0.082363863604454	0.199937633890746
FBgn0010342	260.467742403221	0.155187937314493	0.50839390473762	0.305251372741349	0.760174708448332	0.835101868670641
FBgn0010348	5959.93272492986	-0.507346204654265	0.411727977493916	-1.23223640944284	0.217860786227685	0.357421917529704
FBgn0010350	4131.20338366675	-0.510431187876451	0.182372917996364	-2.7988321593156	0.00512877888981488	0.0591834975100997
FBgn0010352	17180.6543982061	-0.464109953738237	0.218333649427103	-2.12569136711652	0.0335289662232633	0.128891333827041
FBgn0010355	1487.92037735234	-0.508059210172879	0.320970659594301	-1.58288365302627	0.113447985289842	0.237977555182743
FBgn0010356	267.199510500166	-0.168229451541019	0.309066173551256	-0.544315314769054	0.586224509968996	0.700873191245263
FBgn0010357	30938.7461377332	0.223908740708817	0.221913458947326	1.00899126069665	0.312978825452969	0.456313508346664
FBgn0010358	45.103429962392	1.49800791969565	0.602048981417229	2.48818279896317	0.0128397718079417	0.0849920437387468
FBgn0010359	0	NA	NA	NA	NA	NA
FBgn0010379	1737.0785107974	-0.595711110537613	0.330929048739037	-1.80011731459506	0.0718421161698778	0.185439840154648
FBgn0010380	1391.17917204798	-0.399895624508908	0.221513619912075	-1.80528684722699	0.0710298067556558	0.184383581122957
FBgn0010381	2139.34759821032	2.01581834176031	0.982518230527315	2.05168543353992	NA	NA
FBgn0010382	452.965183234422	0.111918453765506	0.461889695970779	0.242305586684027	0.80854338519506	0.869388716663379
FBgn0010383	291.602886093233	-0.291038843338873	0.217130250303207	-1.34038828275866	0.180119143115702	0.315266057642709
FBgn0010385	260.990935456767	0.796179504995347	0.394037733172031	2.02056665636067	0.0433246435141737	0.143551019531118
FBgn0010387	8329.41148837416	0.490967591061697	0.232596551593866	2.11081199483546	0.0347884747222936	0.130682453946819
FBgn0010388	564.124311216378	2.16022825472274	1.02877360747475	2.09980916989626	NA	NA
FBgn0010389	479.762229241184	-0.519458737498245	0.211649182591724	-2.45433850080249	0.0141144048240927	0.0881292197034055
FBgn0010391	1816.6251505937	0.565059627392879	0.252846229940308	2.23479554164711	0.0254307746883995	0.11355585777211
FBgn0010395	407.77025975795	-0.847582011950388	0.370307487573608	-2.28886004305249	0.0220874854943379	0.106508248134117
FBgn0010397	1418.81609095095	-0.204821340883312	0.143982545329013	-1.42254285347766	0.15486872028346	0.28735781986117
FBgn0010398	167.652019955226	-0.237342263018435	0.328183302125981	-0.723200301419741	0.469556833675038	0.602977066657077
FBgn0010399	332.835740568782	-0.680245133172526	0.305296802142533	-2.22814365692223	0.0258709368501951	0.114408768735975
FBgn0010401	1316.18567193876	0.608289318346531	0.32945594805658	1.84634492694624	0.0648421382908654	0.17593942762259
FBgn0010403	1266.90869039628	0.717411852164099	0.210474048771525	3.40855253344259	0.000653085090331041	0.0305191541913187
FBgn0010406	935.543035074919	-0.526942747650222	0.258824114660195	-2.03591055780113	0.0417593374653685	0.141868090909525
FBgn0010407	60.7191206262388	-0.195064598311647	0.279046511601866	-0.699039730659519	0.484527201710724	0.616611413769038
FBgn0010408	16116.5672018221	1.15155459249857	0.352277218132512	3.2688874932168	0.00107971224017871	0.0356494462459006
FBgn0010409	17854.0721457497	1.13740669147227	0.337977437265553	3.36533320293388	0.000764512747067681	0.0320184046826372
FBgn0010411	19785.0459319826	1.07026455016405	0.205570293997316	5.20631911037705	1.92623283808458e-07	0.000362517020127518
FBgn0010412	11878.0829657883	0.898853392931668	0.314946332958754	2.85398907327295	0.00431740162464015	0.0557660057141181
FBgn0010414	213.268631022934	-0.206990962677481	0.280676585922471	-0.737471428181959	0.46083571220539	0.595084265104274
FBgn0010415	3677.14064028286	-0.49111731452316	0.277520854556479	-1.76965913177242	0.076783941859426	0.192018809586783
FBgn0010416	421.077448314256	-0.433986431654183	0.343602043265944	-1.2630496242954	0.206571346311799	0.344564562713553
FBgn0010417	499.965502541015	0.279397266057066	0.132496589993076	2.10871288137806	0.0349693722778745	0.130951003119713
FBgn0010421	376.235953456508	-0.129841022918556	0.230852483777076	-0.562441524536238	0.573815233983803	0.690549181739529
FBgn0010422	863.778197175757	0.199392214143429	0.139213265286995	1.4322788401836	0.15206403629539	0.284074250447456
FBgn0010423	743.620551141947	0.87173227219373	0.327465394471124	2.6620592188119	0.00776642135462075	0.070315991642305
FBgn0010424	1056.99030735782	0.31487323558848	0.250515554962736	1.25690093629243	0.208789509466527	0.34712178163958
FBgn0010425	3320.44770648124	0.140954425136264	0.264814568647083	0.532275946358952	0.594534889221033	0.706963953441539
FBgn0010431	218.545174143647	0.872186837196023	1.21092285806801	0.720266226196743	0.471361095128917	0.604763446360377
FBgn0010433	1.71578017318759	-0.318294013635378	2.20303104440676	-0.144480040099067	0.885121416769355	NA
FBgn0010434	3649.28677985253	-0.836967272811885	0.389233065577708	-2.15029848908042	0.0315316118458628	0.125411504625068
FBgn0010435	8325.758408227	-0.39195450783736	0.134800717786509	-2.90765890770788	0.00364145281876805	0.0524863232324402
FBgn0010438	207.320268295774	0.655966818737838	0.409726927421068	1.6009853754711	0.109380158324836	0.232983602477182
FBgn0010441	256.279043156047	-0.188287813184236	0.289160442800995	-0.651153426659464	0.514947451139352	0.642170863103435
FBgn0010452	230.346752947967	-0.511861431385993	0.231538630271068	-2.21069560093167	0.0270569233736155	0.11650532258881
FBgn0010453	96.48612183501	-0.424498967442176	0.240772919337605	-1.76306774287583	0.0778890648951728	0.193459755077113
FBgn0010470	2980.69505438476	-0.0579169677653596	0.122744973017236	-0.471847981564399	0.637035299889953	0.740976782690291
FBgn0010473	2006.53212034307	-0.874553070172951	0.410419301150792	-2.13087705115416	0.0330992724486404	0.128189190057788
FBgn0010482	5567.308417721	-0.516307691917296	0.257204397971153	-2.00738282855958	0.0447089157778938	0.145863114526492
FBgn0010488	8810.53234678874	-0.618313407390706	0.366775773277496	-1.68580765808351	0.0918328522879709	0.212074405107759
FBgn0010497	1174.23252557256	-0.706403069934755	0.317831662480158	-2.22256984852431	0.0262448192309998	0.115096287799331
FBgn0010501	154.119075218377	0.000197639216702999	0.306072390621183	0.000645727033078302	0.999484784405618	0.99978834850111
FBgn0010504	3980.70080628592	0.332700689880733	0.202605964657976	1.64210708427254	0.100567813792246	0.22203458671008
FBgn0010516	4459.49073044185	0.261025632402053	0.164184056908405	1.58983544028074	0.111871903037091	0.23592131432858
FBgn0010520	176.684527640285	0.555099008440692	0.220348641132728	2.51918507682707	0.011762681047633	0.0818603064561634
FBgn0010531	447.388192989986	0.356416669507277	0.149905488235582	2.37760921032561	0.0174252821272947	0.0953280306656661
FBgn0010548	4845.65163567277	-0.30456486385678	0.177452847532345	-1.71631432288663	0.0861045282307433	0.204238576685598
FBgn0010549	57.930028552073	-0.389817657117493	0.362726352969886	-1.07468799530498	0.282514440178427	0.424625957207509
FBgn0010551	4910.71943018546	0.540361632536224	0.207794627453626	2.60046007520968	0.00930988514531189	0.0743774571888046
FBgn0010575	2385.81961732158	-0.737171842810903	0.4048095628556	-1.82103366731447	0.0686017392696111	0.180972275754911
FBgn0010583	1618.160018166	-0.29807699613351	0.181827905752607	-1.63933580436806	0.101143343191573	0.222745303110294
FBgn0010590	3144.02342430985	0.482122735120848	0.267599734271931	1.80165625512513	0.0715995045836489	0.185205551420575
FBgn0010591	1117.3277415328	-0.124280356436877	0.158240079231298	-0.785391141363225	0.43222427307784	0.569355321820565
FBgn0010602	1418.19698081595	0.322757460963869	0.165970210750188	1.94467103165682	0.0518145841896815	0.156464781888496
FBgn0010607	292.885416352361	0.260419300506234	0.291683347601272	0.892815111482554	0.371956192456479	0.513965898827529
FBgn0010611	2990.1728525795	-0.323179329479891	0.180050180022012	-1.79494032963689	0.0726632074764197	0.1863869596968
FBgn0010612	8028.30970967258	0.637778791390585	0.30135277796871	2.11638597025578	0.0343119943147772	0.130121200232172
FBgn0010620	1482.55877276619	-0.236181488603957	0.160773445470851	-1.4690329482724	0.141823852734522	0.271884085553638
FBgn0010621	1539.02635240503	0.0487163378475734	0.160313732130294	0.303881253341289	0.761218360496011	0.835830195130393
FBgn0010622	334.996979988283	0.0349322297174536	0.144573604752538	0.241622457828634	0.809072718784882	0.869603002143431
FBgn0010638	2614.75704379345	0.729330933959935	0.250815878290883	2.90783398136419	0.00363941491698139	0.0524863232324402
FBgn0010651	1909.15742795298	-0.625559022318038	0.323745925312141	-1.93225295952344	0.0533282914080137	0.158947264934202
FBgn0010660	800.038888702581	-0.243603568642417	0.247451196489874	-0.984450962848287	0.32489383094926	0.467853001787038
FBgn0010741	880.82076281757	0.481893375785639	0.183484178998423	2.62634837737036	0.00863064339480317	0.072837985959729
FBgn0010747	2566.08112119772	-0.261820560376269	0.122603572744068	-2.13550514488524	0.0327197703879333	0.127591512531859
FBgn0010750	633.965633513727	0.15993140399866	0.12276267671495	1.30276895452528	0.192653652728352	0.328801557331689
FBgn0010762	906.937643943265	-0.481315446640768	0.30675794606422	-1.56903986617515	0.116638650070006	0.241290135464612
FBgn0010768	90.613134135439	-0.245095588478638	0.328817663135334	-0.745384497114931	0.456039313106755	0.591092277732034
FBgn0010770	181.478588940047	0.328748583927254	0.331183464323569	0.992647940919127	0.320881553058506	0.464078777032908
FBgn0010772	2250.24854766044	0.0543056492080828	0.15956486409081	0.340335884829739	0.733603596134501	0.815087608625784
FBgn0010774	1609.49669879142	0.461806392716791	0.215733026971721	2.14063835843423	0.032303212963622	0.126898916435467
FBgn0010786	2414.65509357609	-0.0828839426125907	0.130029447132808	-0.637424402242791	0.523848437642128	0.649645045420069
FBgn0010803	1261.75826157402	-0.0382755087269477	0.10545408399936	-0.362958998602463	0.716635513036661	0.80185847682089
FBgn0010808	2143.41025134204	0.661804195751191	0.263580235299576	2.51082633338956	0.0120448936483028	0.0828180735504913
FBgn0010812	731.63559676854	-0.192230790549758	0.159569508481216	-1.20468372923757	0.228325419601869	0.368577267226446
FBgn0010825	2953.01019323169	-0.998145990580096	0.48082612710161	-2.07589798956404	0.0379033867059579	0.136094381486738
FBgn0010830	399.107124045269	0.00964670996093274	0.134045984185495	0.0719656767007913	0.942629223024323	0.961830794215973
FBgn0010877	1267.47742863793	-0.366764532357831	0.228496265973819	-1.60512265176296	0.108466815199851	0.231728949951333
FBgn0010894	420.849638931862	-0.523082015033325	0.251565839697844	-2.07930462920402	0.0375893599186325	0.135442367133195
FBgn0010905	2644.40324931296	-0.83769494554432	0.429386190291655	-1.95091263874911	0.0510674389171061	0.155552009316522
FBgn0010909	2657.56150127343	-0.607336176635231	0.376794797837534	-1.61184862455851	0.106994884141669	0.230102693251591
FBgn0010926	328.871752167748	-0.0041624946325397	0.304054934788609	-0.01368994269221	0.989077347265982	0.992240707651694
FBgn0011016	2419.06273223849	0.372391224630622	0.175698893243787	2.11948531806583	0.0340494732486936	0.129768509395807
FBgn0011020	153.347598971418	0.124935408609167	0.34079953305946	0.366595011112791	0.713921130081234	0.799589353090704
FBgn0011202	1555.88339844314	-0.637999613295168	0.334974600963391	-1.90462086217962	0.0568293727293638	0.164398365466983
FBgn0011204	2451.91361181314	-0.597412870277937	0.290365070505051	-2.05745432547661	0.0396425441039213	0.138879895811338
FBgn0011205	4452.30343138403	-0.431635489768725	0.197742204970984	-2.1828192410015	0.0290491241469171	0.120685323718539
FBgn0011206	10905.4890865862	-0.24738469675989	0.127752904256494	-1.93643109876553	0.052814923700226	0.158348612841779
FBgn0011207	916.125328848387	-0.315132773540584	0.278550843793862	-1.13132945227692	0.257916452444797	0.399552133643903
FBgn0011211	31120.7682952258	0.0763612196884834	0.128663678261322	0.593494766513592	0.552850084393966	0.673875556236687
FBgn0011217	8977.97095275597	-0.559765706182299	0.312713387247458	-1.79002795853873	0.0734494168891352	0.187523763197184
FBgn0011224	4278.25909475642	-0.49978736439122	0.22110860217621	-2.26037051237346	0.0237982650329202	0.11017788219703
FBgn0011225	7948.68133272106	-0.379824412918228	0.214461610005843	-1.77106015807622	0.0765506984679672	0.191689584036685
FBgn0011227	4175.94043273364	0.859573530165214	0.34479195773185	2.49302082281663	0.0126661417984262	0.0844499799403159
FBgn0011230	10811.5490560071	-0.671159806726618	0.368430142934001	-1.82167452799009	0.0685043851166456	0.180784609280186
FBgn0011232	594.957523205043	-0.155054825205715	0.167373512087547	-0.926400021555454	0.354238132913377	0.496302580346785
FBgn0011236	660.65737899671	-0.0119573181965207	0.143999206225312	-0.083037389649297	0.93382180961909	0.956250953744415
FBgn0011239	1236.10093071541	0.563904636829983	0.326369610261675	1.72780987904437	0.084022315649304	0.202010947546042
FBgn0011241	495.827562872007	-0.0672180980571154	0.139129272370354	-0.483134116292831	0.629000511552339	0.735087521907539
FBgn0011244	13069.707732403	0.0552237131727955	0.205336311331278	0.268942754521877	0.787973735272108	0.853843418785745
FBgn0011259	787.231237269009	-0.893337469526769	0.418180983814676	-2.13624603724847	0.0326593647880158	0.127445044939964
FBgn0011260	463.983997056641	-0.484444495349849	0.500868477886233	-0.967208991458803	0.33343956820468	0.476177005043734
FBgn0011270	6617.23391241387	0.844392937339587	0.32433001589786	2.603499201275	0.00922774826532912	0.0741550026020508
FBgn0011272	14244.3124454877	0.815992457681685	0.254012084364813	3.21241589636244	0.00131623680360155	0.0375093359515227
FBgn0011273	0	NA	NA	NA	NA	NA
FBgn0011274	1712.26238735944	-0.717623704587938	0.286692668784972	-2.50311145949176	0.0123106767713654	0.0834002059778584
FBgn0011276	6.2286873406362	2.20022642726033	0.853700963401668	2.57728000972763	0.00995812462567745	NA
FBgn0011277	5.53578773161408	-1.13999743147664	0.80797026739701	-1.41093982969114	0.15826235663968	NA
FBgn0011278	65.3047409462978	-0.167512271788967	0.419270670596115	-0.39953253002601	0.689500859425595	0.781106227712855
FBgn0011279	324.61162086366	0.702492375629067	0.347804503299594	2.01979091404676	0.043405080006498	0.143616564775675
FBgn0011280	9356.74094080322	0.668089092369664	0.307585622638849	2.17204265478331	0.0298524457222711	0.122597743608793
FBgn0011281	1415.35833829153	0.844786142492776	0.277764124279194	3.04137960467365	0.00235496724027353	0.0455710755833716
FBgn0011282	227.277226358182	0.899577773131105	0.352870600653472	2.54931346353366	0.0107935235662137	0.0792761803692058
FBgn0011283	490.157007551989	1.04750940945606	0.369673763391746	2.83360495980346	0.00460261903457491	0.0570950123931166
FBgn0011284	22115.4028256415	0.950908670109541	0.352341579298024	2.69882615615237	0.00695845151145771	0.066993495806488
FBgn0011286	6322.03540530364	-0.717872777080047	0.365873486513451	-1.9620792529159	0.0497532579994864	0.153666008001713
FBgn0011288	1920.3047876193	-0.576174475887688	0.228678806278544	-2.51957969023975	0.011749504066307	0.0818534789408355
FBgn0011289	1398.17679805801	0.0184555833270122	0.102346903319448	0.180323807838212	0.856898366068892	0.904620637518819
FBgn0011290	528.432160186298	0.501787634080143	0.215919739114879	2.32395442925749	0.0201279365834368	0.102270043340668
FBgn0011291	201.024806779868	0.476441318217652	0.170524578250972	2.79397447045108	0.005206458877426	0.0593833346099993
FBgn0011293	1617.46048656591	1.28756488424877	0.375219500770422	3.43149778091243	0.000600258041224188	0.0300676784604086
FBgn0011294	308.501151127073	1.27571435292387	0.47255847411627	2.69959046932675	0.00694248771141077	0.066993495806488
FBgn0011296	4403.47310156806	0.678670324763089	0.306555754402775	2.21385609311186	0.0268386799407917	0.116071250572901
FBgn0011297	358.01463507515	0.532560719059041	0.214659325991737	2.48095775293519	0.013102990194458	0.0857520083565769
FBgn0011300	1380.50001083908	-0.455643279067641	0.274431733819194	-1.66031556455434	0.096850986173919	0.217584394927559
FBgn0011305	803.734857252965	0.0131328636578181	0.16409578149956	0.0800316957438261	0.936212047256546	0.957953981402543
FBgn0011327	3139.95921375976	0.145284323946608	0.129963165557566	1.11788846726926	0.263614631191391	0.405707844779834
FBgn0011335	267.785675066649	0.0828892754689703	0.220044592084341	0.376693081542308	0.706401704904052	0.794061442847625
FBgn0011336	3732.40618205512	0.129745612470292	0.218073613357624	0.594962455441682	0.551868567669654	0.673225411320157
FBgn0011361	3757.39456865541	0.548642178578995	0.239417480311515	2.29157109942489	0.0219304047592752	0.106134799480255
FBgn0011455	4324.97348812904	0.567802950099967	0.241274603652527	2.35334735402857	0.0186052450520935	0.0981993182356891
FBgn0011474	738.896756310195	-0.0513957705281429	0.262549488923373	-0.195756505712121	0.844800754750271	0.896159525169504
FBgn0011476	343.635292728732	0.72735131949221	0.228385295889643	3.18475546623488	0.00144876373336398	0.0384798657728569
FBgn0011481	1403.76080721727	-0.650815459666439	0.448753410497258	-1.45027412481452	0.146982091654183	0.277691391861782
FBgn0011509	617.978039283642	0.44305273313815	0.19706886205945	2.24821277449958	0.0245626254953545	0.111676153650655
FBgn0011554	219.698526000751	0.23813861731778	0.152811871076853	1.55837773361216	0.119143731745091	0.244676464849544
FBgn0011555	2305.94142627542	0.120375100389356	0.15141926224739	0.79497878012829	0.426625845812816	0.564407400355296
FBgn0011556	903.486614170761	0.613526707801797	0.23293290880311	2.63392026036299	0.00844053078576801	0.0725528266060356
FBgn0011559	44761.6666318084	-0.0791663086234592	0.185077684505143	-0.427746374908096	0.668835782563412	0.765629211366164
FBgn0011566	204.696732029675	0.0626365219385124	0.174443960060404	0.359063861636846	0.719547315563393	0.803808728502683
FBgn0011569	395.782217489737	-0.584576567047604	0.185992725426799	-3.14300769401691	0.00167221444483459	0.0407079989125104
FBgn0011570	820.114418605672	-0.0622444327128025	0.237100346751285	-0.262523583645772	0.792917805651903	0.857424612039161
FBgn0011571	1554.88133912823	-0.247635790864504	0.144677805378646	-1.71163635096897	0.0869637049524808	0.205352186600463
FBgn0011573	1838.54263586838	0.221983858204943	0.110887205261812	2.00188883542356	0.0452966886794963	0.146589071708366
FBgn0011576	837.438330720589	0.439388908073934	0.2287552359237	1.92078186232419	0.0547592140364798	0.160882668536259
FBgn0011581	1197.21301924321	0.519394974260674	0.309714476256721	1.67701226154553	0.0935400841661325	0.213942424952722
FBgn0011582	244.962604734989	-0.567668306408352	0.286331806690093	-1.98255413176211	0.0474172551787714	0.149874021047297
FBgn0011584	4258.03379691729	-0.190611404737003	0.162694000100433	-1.17159455554192	0.241359874982394	0.381484702221723
FBgn0011586	993.937313943814	0.130290290369999	0.151908919599945	0.85768690023681	0.391065375432301	0.531781095782941
FBgn0011589	202.7484666875	-0.598942897238071	0.288739726483422	-2.07433491931516	0.038048216918521	0.136214639449527
FBgn0011591	323.821892248291	-0.317118014021784	0.128224350479051	-2.4731497007941	0.013392802913078	0.0864272075320988
FBgn0011592	731.987137397589	-0.170851913346678	0.154180461460293	-1.10812947197384	0.267805904440199	0.409825705151915
FBgn0011596	1990.04666165446	-0.504760614373343	0.149594067717145	-3.37420207950862	0.000740300005148692	0.0315276747852277
FBgn0011603	1279.0717534951	-0.186235976189979	0.166366073432347	-1.11943482434663	0.262954681303615	0.404943768790105
FBgn0011604	1762.71919172539	-0.485808951368254	0.275384592965211	-1.76411086087748	0.0777133162686776	0.193205364884612
FBgn0011606	2427.38474653772	-0.0915275871905022	0.207738102762534	-0.440591234700586	0.659508949622169	0.757878126410492
FBgn0011638	1194.26862516283	0.192723005584145	0.23122748156639	0.833477942494525	0.404575232760446	0.544642766849184
FBgn0011640	1632.4927582323	0.285030080660956	0.145337756713459	1.96115646137919	0.049860774012486	0.15377715135175
FBgn0011642	1705.19082956921	-0.329917753802303	0.297545492615344	-1.10879768637198	0.267517468800307	0.40951372693182
FBgn0011648	1053.67144629062	-0.284112365624623	0.285192599861753	-0.996212264141306	0.319147021774814	0.462636758897601
FBgn0011653	41.0768711116655	0.311125071437831	0.759604481933598	0.409588251303957	0.68210801677508	0.775284819609929
FBgn0011655	600.608209980723	-0.343392829226741	0.226341415034428	-1.5171453672078	0.129229986228836	0.256977485068482
FBgn0011656	2072.31794223244	-0.519058523098538	0.24153285131551	-2.1490183230624	0.0316329474998129	0.125521822398354
FBgn0011659	109.524082983387	-0.00559250318529399	0.260911026131265	-0.0214345222132559	0.982899035142181	0.987848023265418
FBgn0011660	397.512398638667	-0.490146723029513	0.347895848471166	-1.40888925574557	0.158867917044316	0.292272487028799
FBgn0011661	5385.13804035246	-0.656413601808409	0.377945321903706	-1.73679514936727	0.082423335557114	0.199971459047775
FBgn0011666	1552.59394387332	-0.780587180748898	0.333658500820479	-2.33947937435853	0.0193106378128914	0.0999987098242737
FBgn0011668	48466.9674875987	1.97438233131771	0.60802622898554	3.24719927726121	0.00116546755602615	0.0371597150143604
FBgn0011669	70621.0947046712	1.89901747169444	0.632913803751088	3.00043617383527	0.00269593247908715	0.0475094643456872
FBgn0011670	10247.7391016335	1.37430263128984	0.492904782757795	2.78817061502352	0.00530066196073766	0.0596624211629662
FBgn0011672	1372.1319059561	-0.396913105005848	0.298152767541172	-1.33124072024935	0.18310981670391	0.318453957129677
FBgn0011674	247.120498275113	-0.62190143032976	0.346435662949465	-1.7951426392856	0.0726309767213276	0.186373293207396
FBgn0011676	255.886767652221	-0.564920312908792	0.232281126766128	-2.43205429891676	0.0150134564037433	0.0896587827121098
FBgn0011692	164.055864062951	0.0669355820792403	0.570541194457881	0.117319455158433	0.906606908504671	0.937197066277506
FBgn0011693	5823.16229861636	0.34949478545383	0.195500476891521	1.78769275150032	0.0738255918271772	0.188119602849368
FBgn0011694	41872.188585944	0.248643001032749	0.280329570302568	0.886966725502348	0.375096815336679	0.517292520658631
FBgn0011695	27034.8252744056	0.553018124468952	0.272414730453819	2.03005954761577	0.0423504867668588	0.142307696762033
FBgn0011701	287.92785601802	-0.691201070522336	0.243339435809363	-2.8404811091279	0.00450455408330625	0.0566759955710948
FBgn0011703	222.740036493057	0.525628270060378	0.776624742403922	0.676811130731396	0.498525795041187	0.627935636664366
FBgn0011704	424.271787000129	0.0791826937182168	0.481040906280148	0.164606985984893	0.869253332209737	0.912653397392285
FBgn0011705	508.286231462373	-0.397297257969236	0.359497782861092	-1.10514522456109	0.269096667047883	0.411023709181311
FBgn0011706	32.9866525395759	0.129057807157191	0.363433764035443	0.355106817055679	0.722509569776793	0.806359461889333
FBgn0011708	1851.18335390734	-0.106124800927772	0.0851036778141031	-1.24700604784187	0.212395280023169	0.351329500463723
FBgn0011710	732.418879045953	-0.0338702462168798	0.252802228247758	-0.133979223409713	0.893419003613502	0.928006146306416
FBgn0011715	485.832309033064	0.685608541181119	0.225043835317757	3.04655553089492	0.00231479717074438	0.0453122406053291
FBgn0011722	1584.68872560902	-0.297850878438002	0.243404378802787	-1.2236874287267	0.2210701638075	0.361202820042169
FBgn0011723	208.080239549113	0.0824954290102563	0.247469274466125	0.333356248723106	0.738865384662073	0.819251788514214
FBgn0011725	9009.60937589331	-0.120778103623832	0.154505550509237	-0.781707215214976	0.434386660378637	0.571575096267296
FBgn0011726	5058.07321100539	0.292087772947214	0.165221190465109	1.76785902658713	0.0770844740805004	0.192368035903867
FBgn0011737	1694.12719097827	-0.191381521654446	0.145988290983926	-1.31093747563301	0.189878888363605	0.32554196711376
FBgn0011739	1645.5666371423	-0.638459917181091	0.284035478099282	-2.24781749608731	0.0245878297548364	0.111676153650655
FBgn0011740	880.115938252098	-0.147609322040904	0.182274629988636	-0.80981825090034	0.418044641508594	0.55590189837834
FBgn0011741	329.439111811823	0.453444315134661	0.204765094709174	2.21446099384606	0.0267970831072377	0.116071250572901
FBgn0011742	1581.91489521043	-0.380679214826949	0.209876519510603	-1.81382469899267	0.0697047186738339	0.182780645662637
FBgn0011743	2470.64959520464	0.114146675803692	0.18099246384566	0.63067087644616	0.528255745390817	0.653511239532221
FBgn0011745	1598.2622619176	0.217971867481204	0.143316408839615	1.52091354539267	0.128281534306598	0.255854657969968
FBgn0011746	660.237580415549	-0.614190706945223	0.208201680578338	-2.94997958344591	0.00317794929106671	0.0502125304396309
FBgn0011747	4580.37022133154	-0.7565813509215	0.42767414052664	-1.76906031772191	0.0768838092166893	0.192049166215522
FBgn0011754	3765.77027942551	-0.27545861774638	0.120963433193371	-2.27720568501089	0.0227739458165198	0.107922288556415
FBgn0011758	55.9757787869546	-0.385480632231125	0.260388663939466	-1.48040481639685	0.138765245428226	0.268403074918728
FBgn0011760	5596.76573813774	-0.110152566027227	0.19000037865547	-0.579749192115916	0.56208376487438	0.681850047739879
FBgn0011761	1575.21958747622	1.23241606118725	1.71634764641751	0.718045708140563	0.472729104162816	0.605751699079947
FBgn0011762	61.6956239099589	0.19817129007349	0.409300780126968	0.484170320936149	0.628264998111521	0.734602208673221
FBgn0011763	1101.84643072535	-0.317822758973138	0.29599840242121	-1.07373133224169	0.282943114170944	0.425076130241534
FBgn0011764	1136.53656575996	-0.559672191649541	0.35712676612889	-1.56715274443347	0.117078993044945	0.241679513377327
FBgn0011766	1888.28385547727	-0.662360532902977	0.379242883657253	-1.74653384795375	0.0807182307774192	0.19739115266905
FBgn0011768	2885.74874738584	0.373944591262661	0.12621634332683	2.96272718259911	0.00304926698518938	0.0496923816869962
FBgn0011769	263.678186003773	0.859553715118853	0.286165165662018	3.00369792783951	0.00266719996782823	0.0475094643456872
FBgn0011770	2041.11759028739	0.184632838322491	0.237910180479809	0.776061108230552	0.437712905692803	0.57481049569876
FBgn0011771	562.015550829263	-0.227638114924598	0.245005679420575	-0.929113624888003	0.352830204184422	0.495161833444449
FBgn0011774	180.363781778935	-0.0245339540213964	0.332929723647552	-0.0736910893764736	0.941256189159345	0.961275263462506
FBgn0011785	1105.18694709141	-0.543087941830709	0.38019323476703	-1.42845240832203	0.153161683644748	0.285250633925247
FBgn0011787	714.695426513456	1.02660389145027	0.293788607670133	3.49436249278579	0.000475195329812934	0.0273372195412908
FBgn0011802	1165.12863187137	-0.224657722451593	0.187290863492068	-1.19951244958144	0.230328746822379	0.370766240302789
FBgn0011812	0.189410426026757	-1.31168459427647	3.81114529006474	-0.344170713642404	0.730717905551142	NA
FBgn0011817	2131.83309568704	-0.667674667168285	0.28855570321661	-2.31385018464557	0.0206759414605567	0.103224790461935
FBgn0011818	968.045509248258	-0.0720690704624554	0.114337065872324	-0.630321146625645	0.528484490185634	0.653548734976583
FBgn0011822	184.981776049197	-0.158007907514616	0.276994449544028	-0.570437089171712	0.568381279898226	0.686770153295353
FBgn0011824	592.337951429457	0.500645746247968	0.321087194545794	1.55922053184393	0.118944192904819	0.244434214313168
FBgn0011826	1134.56706738346	-0.662710569534384	0.369670987804304	-1.79270375928232	0.0730203051092935	0.186935386612871
FBgn0011828	999.658584320375	-0.157370477142069	0.179919597733952	-0.874671126014704	0.38175287507417	0.523613443974986
FBgn0011829	49.9198985555458	-0.87857665585578	0.491582857670277	-1.78724022236974	0.0738986709393818	0.188178426808181
FBgn0011832	0	NA	NA	NA	NA	NA
FBgn0011834	193.213699983486	0.419378399617911	0.201700516498131	2.07921331536004	0.0375977483380974	0.135442367133195
FBgn0011836	427.459430293081	-0.113117104824653	0.192714015040194	-0.586968751603565	0.557224693677498	0.677986482126811
FBgn0011837	1523.45259416434	-0.798638776317922	0.414046334188824	-1.92886329469036	0.0537478356307297	0.15932410525378
FBgn0011840	0	NA	NA	NA	NA	NA
FBgn0011844	2.60948211841602	-4.12652985135141	1.67805636422544	-2.45911278031244	0.0139280856213064	NA
FBgn0011845	1.08129616970979	0.991096117200967	1.58409657358339	0.625653848211415	0.531542010875435	NA
FBgn0011848	0	NA	NA	NA	NA	NA
FBgn0011849	0	NA	NA	NA	NA	NA
FBgn0011850	0	NA	NA	NA	NA	NA
FBgn0011851	0	NA	NA	NA	NA	NA
FBgn0011852	0	NA	NA	NA	NA	NA
FBgn0011853	0	NA	NA	NA	NA	NA
FBgn0011854	0	NA	NA	NA	NA	NA
FBgn0011855	0	NA	NA	NA	NA	NA
FBgn0011858	0	NA	NA	NA	NA	NA
FBgn0011859	0	NA	NA	NA	NA	NA
FBgn0011860	0	NA	NA	NA	NA	NA
FBgn0011861	0.162805803333611	1.05472934698451	3.81693625648277	0.276328782067852	0.782295551301721	NA
FBgn0011862	0	NA	NA	NA	NA	NA
FBgn0011863	0	NA	NA	NA	NA	NA
FBgn0011864	0	NA	NA	NA	NA	NA
FBgn0011865	0.0813331352423052	0	3.81693625648277	0	1	NA
FBgn0011866	0	NA	NA	NA	NA	NA
FBgn0011867	0	NA	NA	NA	NA	NA
FBgn0011868	0	NA	NA	NA	NA	NA
FBgn0011869	0	NA	NA	NA	NA	NA
FBgn0011870	0	NA	NA	NA	NA	NA
FBgn0011871	0	NA	NA	NA	NA	NA
FBgn0011872	0.119183042899089	-0.628381337104476	3.81693625648277	-0.164629769762914	0.869235398039685	NA
FBgn0011877	0.241192911018029	1.05472334163559	3.81693625648277	0.276327208725119	0.782296759623639	NA
FBgn0011878	0.256313228794759	2.11180388964277	3.76000568058799	0.561649122113168	0.574355105149705	NA
FBgn0011879	0.389910015954386	-1.47033261426196	3.80448492510671	-0.386473502512491	0.699146023058723	NA
FBgn0011880	0	NA	NA	NA	NA	NA
FBgn0011881	0.289552188366302	-0.628393355831768	3.81693625647674	-0.164632918552277	0.869232919486598	NA
FBgn0011882	0	NA	NA	NA	NA	NA
FBgn0011883	0	NA	NA	NA	NA	NA
FBgn0011884	0	NA	NA	NA	NA	NA
FBgn0011885	0	NA	NA	NA	NA	NA
FBgn0011887	0.0925714499852765	1.05472934698451	3.81693625648277	0.276328782067852	0.782295551301721	NA
FBgn0011888	0.745622725326067	1.03927353458599	2.6579433158625	0.391006658563274	0.695792314076455	NA
FBgn0011889	2.44397772091245	-1.41512336678992	1.3945102721411	-1.01478160115463	0.310209946032219	NA
FBgn0011890	0.186078875446425	1.79805399123024	3.77875477657514	0.4758324097601	0.63419377829473	NA
FBgn0011891	3.19267837862007	-3.43345950816915	1.57533816483966	-2.1795063338154	0.0292940746593145	NA
FBgn0011892	1.14985504113049	-1.77539924170399	2.02021248178005	-0.878818073700669	0.379499925000688	NA
FBgn0011893	1.46041106231309	-2.69236074740542	1.86910666369472	-1.44045323881268	0.149739210616221	NA
FBgn0011894	1.04901961280697	-0.0722041292133102	1.80258354441786	-0.0400559127685969	0.96804855008467	NA
FBgn0011895	1.2892219105327	0.434479983037968	1.66126327945884	0.261535897657053	0.793679270217633	NA
FBgn0011896	0	NA	NA	NA	NA	NA
FBgn0011897	0.40399871435164	2.43090042830958	3.73486339839684	0.650867292590414	0.515132156493495	NA
FBgn0011902	0	NA	NA	NA	NA	NA
FBgn0011904	0.0813331352423052	0	3.81693625648277	0	1	NA
FBgn0011905	0	NA	NA	NA	NA	NA
FBgn0011906	0	NA	NA	NA	NA	NA
FBgn0011909	1.23720333864243	1.73447806183288	2.19128313479425	0.791535349445264	0.428631656566135	NA
FBgn0011910	0.0864921440367641	0	3.81693625648277	0	1	NA
FBgn0011915	0	NA	NA	NA	NA	NA
FBgn0011916	1.11605847593537	2.96515290658424	2.07027925005464	1.43224780256383	0.152072915567166	NA
FBgn0011919	0	NA	NA	NA	NA	NA
FBgn0011921	0.0864921440367641	0	3.81693625648277	0	1	NA
FBgn0011927	0	NA	NA	NA	NA	NA
FBgn0011928	0	NA	NA	NA	NA	NA
FBgn0011931	0.0947052130133785	-0.628381337104476	3.81693625648277	-0.164629769762914	0.869235398039685	NA
FBgn0011932	0	NA	NA	NA	NA	NA
FBgn0011933	0	NA	NA	NA	NA	NA
FBgn0011934	0	NA	NA	NA	NA	NA
FBgn0011935	0	NA	NA	NA	NA	NA
FBgn0011936	0.16266627048461	0	3.81693625647758	0	1	NA
FBgn0011937	0.325611606667221	2.43090643366047	3.73486339840024	0.650868900506964	0.515131118454573	NA
FBgn0011938	0	NA	NA	NA	NA	NA
FBgn0011944	0	NA	NA	NA	NA	NA
FBgn0011945	0	NA	NA	NA	NA	NA
FBgn0011948	0	NA	NA	NA	NA	NA
FBgn0011949	0	NA	NA	NA	NA	NA
FBgn0011950	0	NA	NA	NA	NA	NA
FBgn0011951	0	NA	NA	NA	NA	NA
FBgn0011952	0	NA	NA	NA	NA	NA
FBgn0011953	0	NA	NA	NA	NA	NA
FBgn0011954	0	NA	NA	NA	NA	NA
FBgn0011955	0	NA	NA	NA	NA	NA
FBgn0011956	0.0935074254611484	1.05472934698451	3.81693625648277	0.276328782067852	0.782295551301721	NA
FBgn0011957	0.116567900292774	-0.628381337104476	3.81693625648277	-0.164629769762914	0.869235398039685	NA
FBgn0011958	0.238366085798179	-1.47031323335683	3.80448570173753	-0.386468329394779	0.699149853593067	NA
FBgn0011959	0.661343562525875	1.03942870755802	2.65203924858501	0.391935642774746	0.695105766497419	NA
FBgn0011960	0	NA	NA	NA	NA	NA
FBgn0011961	0	NA	NA	NA	NA	NA
FBgn0011962	0	NA	NA	NA	NA	NA
FBgn0011963	0	NA	NA	NA	NA	NA
FBgn0011965	0.162805803333611	1.05472934698451	3.81693625648277	0.276328782067852	0.782295551301721	NA
FBgn0011966	0	NA	NA	NA	NA	NA
FBgn0011970	0	NA	NA	NA	NA	NA
FBgn0011971	0.156774215368837	0	3.8169362564781	0	1	NA
FBgn0011974	0	NA	NA	NA	NA	NA
FBgn0011975	0.162805803333611	1.05472934698451	3.81693625648277	0.276328782067852	0.782295551301721	NA
FBgn0011976	0	NA	NA	NA	NA	NA
FBgn0011977	0	NA	NA	NA	NA	NA
FBgn0011980	0.0783871076844186	0	3.81693625648277	0	1	NA
FBgn0011981	0.634957025482322	1.83470178728994	2.28211140081147	0.803949266734989	0.421426275459085	NA
FBgn0011982	1.03271568421269	1.9207558500673	1.85109740882631	1.0376308890655	0.299441931455442	NA
FBgn0011983	0.116567900292774	-0.628381337104476	3.81693625648277	-0.164629769762914	0.869235398039685	NA
FBgn0011984	0	NA	NA	NA	NA	NA
FBgn0011985	0	NA	NA	NA	NA	NA
FBgn0011986	0	NA	NA	NA	NA	NA
FBgn0011987	28.441636326728	2.41882843313474	1.11526959974715	2.16882844621886	0.0300957107363403	0.122916340414057
FBgn0011993	0	NA	NA	NA	NA	NA
FBgn0011994	0.119183042899089	-0.628381337104476	3.81693625648277	-0.164629769762914	0.869235398039685	NA
FBgn0011998	0	NA	NA	NA	NA	NA
FBgn0011999	0.162805803333611	1.05472934698451	3.81693625648277	0.276328782067852	0.782295551301721	NA
FBgn0012000	0	NA	NA	NA	NA	NA
FBgn0012001	0	NA	NA	NA	NA	NA
FBgn0012002	0	NA	NA	NA	NA	NA
FBgn0012003	0	NA	NA	NA	NA	NA
FBgn0012004	0	NA	NA	NA	NA	NA
FBgn0012009	0	NA	NA	NA	NA	NA
FBgn0012010	0	NA	NA	NA	NA	NA
FBgn0012011	0	NA	NA	NA	NA	NA
FBgn0012016	0	NA	NA	NA	NA	NA
FBgn0012017	0.488417410000832	3.03429742296326	3.69973848921142	0.820138350808143	0.412137241624424	NA
FBgn0012018	0	NA	NA	NA	NA	NA
FBgn0012024	0	NA	NA	NA	NA	NA
FBgn0012025	0.162805803333611	1.05472934698451	3.81693625648277	0.276328782067852	0.782295551301721	NA
FBgn0012026	0.675694072999487	2.56635517929085	3.1077732117144	0.825785861599315	0.408925575692305	NA
FBgn0012027	0.561417148623598	-0.384970456187623	2.90083634764971	-0.132710160123142	0.894422607328058	NA
FBgn0012028	0	NA	NA	NA	NA	NA
FBgn0012034	10743.3157996835	-0.545416612486464	0.295704809090819	-1.84446311226191	0.065115676920144	0.176218966258418
FBgn0012036	17887.5738673059	0.152483400987092	0.121299776582534	1.25707899291422	0.208725033124759	0.347102194696487
FBgn0012037	4223.93646737916	-0.149027523112223	0.109798072904926	-1.35728723801251	0.174689960749564	0.309572981290658
FBgn0012042	326.458198390826	1.03672358947284	0.41122058243176	2.52108876297524	0.011699233612401	0.0818534789408355
FBgn0012051	1194.34859168471	-0.521925938728884	0.258411786331196	-2.01974509808137	0.0434098345936495	0.143616564775675
FBgn0012058	1708.57984826792	-0.386350707514919	0.23289582037522	-1.65889927475927	0.0971360908254237	0.217816316686661
FBgn0012344	389.058626466934	-0.149644108212403	0.170845298425013	-0.875904163544099	0.381082135904784	0.523119314203358
FBgn0013263	452.660688105941	-0.466757740557962	0.269035656257827	-1.73492892001888	0.082753395974512	0.200467547101561
FBgn0013269	1071.11821486777	0.549822386089989	0.383464386744069	1.43382907278154	0.15162104629664	0.283729497714764
FBgn0013272	11969.341212669	-0.562710009847144	0.317243219873701	-1.77374952275156	0.0761045909038621	0.191226755782468
FBgn0013275	128.809897544619	-0.71138681796272	0.767546336012081	-0.926832406834032	0.354013556306699	0.496093457162477
FBgn0013276	439.050009676438	-1.30043904972277	0.941276525269522	-1.38156961829087	0.167103887966978	0.301400139660046
FBgn0013277	320.099619472197	-1.46101069387782	1.74971787462961	-0.834997867405965	0.403718909120006	0.543949917767993
FBgn0013278	1448.81776525051	-0.951902228497974	1.4022935167616	-0.678818105567699	0.497253120326816	0.627052034764571
FBgn0013279	673.510736459948	-0.825123361878353	0.654886906039259	-1.25994786927209	0.207688168620299	0.345814450632434
FBgn0013300	3336.87280929085	0.602598217394949	0.317650082449712	1.89705040448194	0.0578212859673482	0.165972396609876
FBgn0013301	6708.89170604639	0.768506563783902	0.349289463059962	2.20019967694237	0.0277927312218604	0.11807205453621
FBgn0013303	1126.67652273255	0.0776189599608236	0.209099801991724	0.371205325024152	0.710484607221786	0.797132023125516
FBgn0013305	3717.49556479362	-0.33350936766381	0.152408007991688	-2.18826669319107	0.0286501815350675	0.119745397063128
FBgn0013307	592.839768165283	0.0887856958911265	0.312330679233943	0.284268250909236	0.77620481501993	0.84607994647299
FBgn0013308	115.927050410623	0.399300791973037	0.417993082637912	0.955280861236005	0.339435683371479	0.482181291929037
FBgn0013323	113.570031684516	0.538138382006237	0.347354281516455	1.54924931299787	0.121321799246396	0.247011435588458
FBgn0013325	15399.0894541054	0.859326225389298	0.21887950766735	3.92602411503633	8.63615011503186e-05	0.015833499859486
FBgn0013334	5961.01076564646	-0.778001529624071	0.303635056669303	-2.56229151586871	0.0103983997339182	0.0782557809804687
FBgn0013342	5003.68472967215	-0.563783304459528	0.182253591754038	-3.09340023992716	0.00197877068229851	0.0428051313113309
FBgn0013343	380.467767977744	-0.617041780954959	0.669967737005729	-0.921002231708483	0.357049261867484	0.498861700693842
FBgn0013347	971.706374876653	0.630164607652999	0.26481514247146	2.37963963001441	0.0173295762055013	0.0951399647182637
FBgn0013348	3713.9154733715	-0.163461785770165	0.244966902808928	-0.667281105715999	0.504592592851856	0.633397124176308
FBgn0013432	534.03045329618	0.223321293639856	0.140220872797072	1.59263944935678	0.111241098321064	0.235337489587744
FBgn0013433	116.203220325274	-0.796134017663629	0.282693272525055	-2.81624677712508	0.00485883289656278	0.0583502867632799
FBgn0013435	189.755548471267	0.551285432362979	0.280453001669723	1.96569631660496	0.0493337005646231	0.153030885622403
FBgn0013467	1659.43249567405	-0.555451513112636	0.260510075535889	-2.13216902252257	0.0329929540674005	0.128063988474936
FBgn0013469	262.817703128077	-0.812650447382936	0.370222121708648	-2.1950348175641	0.0281611002672532	0.118796800001886
FBgn0013531	187.28761348275	0.266964981985009	0.202810737305903	1.31632568142751	0.188064754731853	0.323864716187899
FBgn0013548	145.681836834682	0.268487883935792	0.490637079669756	0.547222978166487	0.58422555161511	0.699562571984862
FBgn0013563	316.981949063361	-0.554571816014174	0.337925867449236	-1.64110495654046	0.100775630048481	0.222232700076782
FBgn0013576	9167.48022260065	-0.828988314764709	0.343389914086937	-2.41413122738029	0.0157727804716235	0.0915161403146079
FBgn0013672	130514.301314004	-0.779328717157226	0.561939863988585	-1.38685430078877	0.165486195258047	0.299618307058795
FBgn0013673	281.22675487931	-5.28344819244166	0.986213688034247	-5.35730567983983	8.44721391893634e-08	0.000278208990420168
FBgn0013674	303000.865493559	-0.793344838102126	0.34031966449294	-2.33117542380095	0.0197441114864762	0.101170332447623
FBgn0013675	132522.178174268	-0.118618029760795	0.329706012300187	-0.359769083169756	0.719019825243893	0.803491999131652
FBgn0013676	185087.749688289	-0.562955212115585	0.321927007204752	-1.74870451846724	0.0803421085975457	0.196880010912215
FBgn0013678	148514.283107608	-0.99478234425982	0.429643101689256	-2.31536905945556	0.0205927432950746	0.103224790461935
FBgn0013679	48071.7854770061	-1.18018856467629	0.427864644093074	-2.75832224272208	0.00580988937964226	0.0623793664934044
FBgn0013680	6172.22573298754	-2.0949335554493	0.549402703806595	-3.81311111309488	0.000137228379726049	0.018569386853914
FBgn0013681	5999.26930297516	-0.256704389195168	0.456192474392142	-0.562710705688902	0.573631893079378	0.690517777725487
FBgn0013683	536.896669659683	-4.01013157756291	0.740396755176364	-5.41619280409689	6.08814503381917e-08	0.000267350742251779
FBgn0013684	55096.0107499419	-1.33951656589788	0.595322902186006	-2.25006725086372	0.0244446765950598	0.111676153650655
FBgn0013685	2027.53688760576	-2.95456702170214	1.07428577836343	-2.7502616912635	0.00595476877058884	0.0629759533640146
FBgn0013686	3239419.59045141	0.886850141557841	0.481400231178867	1.84223040231222	0.0654414551464187	0.176586289277568
FBgn0013688	19696.636876633	-1.32960314403554	0.950216042788357	-1.3992640453995	0.161733817256415	0.295230886592214
FBgn0013689	5.1823575394734	-1.69993345057619	1.03244519323824	-1.646512048978	0.0996583814771102	NA
FBgn0013690	3.37827749381051	0.482356132297917	1.0330134001486	0.466940827900711	0.640542213661407	NA
FBgn0013691	0.502742791515894	0	3.81693625646672	0	1	NA
FBgn0013692	0.235750943191864	-1.47031323335682	3.80448570173753	-0.386468329394778	0.699149853593067	NA
FBgn0013693	0	NA	NA	NA	NA	NA
[truncated: 16,068 more rows]

## Sheet: RNAi ctrl vs CG18549 RNAi KD
Flybase Gene ID	baseMean	log2FoldChange	lfcSE	stat	pvalue	padj
[truncated: 17,558 more rows]

[truncated: 1 more sheets: Analysis with ANOVA]
